# Supplementary material for: Compassion fatigue, burnout, compassion satisfaction and depression among emergency department physicians and nurses: a cross-sectional study
Source: PubMed Central journal article supplement — BMJ Open. 2022 Apr 27;12(4):e055941. doi: 10.1136/bmjopen-2021-055941 (PMC9052053; doi:10.1136/bmjopen-2021-055941), 2022-04-27
Supplement: bmjopen-2021-055941.draft_revisions.pdf [file bmjopen-2021-055941.draft_revisions.pdf]

# BMJ Open

BMJ Open is committed to open peer review. As part of this commitment we make the peer review history of every article we publish publicly available.

When an article is published we post the peer reviewers' comments and the authors' responses online. We also post the versions of the paper that were used during peer review. These are the versions that the peer review comments apply to.

The versions of the paper that follow are the versions that were submitted during the peer review process. They are not the versions of record or the final published versions. They should not be cited or distributed as the published version of this manuscript.

BMJ Open is an open access journal and the full, final, typeset and author-corrected version of record of the manuscript is available on our site with no access controls, subscription charges or pay-per-view fees (<http://bmjopen.bmj.com>).

If you have any questions on BMJ Open's open peer review process please email [info.bmjopen@bmj.com](mailto:info.bmjopen@bmj.com)

# BMJ Open

## Association between compassion fatigue and depression among emergency medical staff in China: a cross-sectional study

|                               |                                                                                                                                                                                                                                                                                                                                         |
|-------------------------------|-----------------------------------------------------------------------------------------------------------------------------------------------------------------------------------------------------------------------------------------------------------------------------------------------------------------------------------------|
| Journal:                      | <i>BMJ Open</i>                                                                                                                                                                                                                                                                                                                         |
| Manuscript ID                 | bmjopen-2021-055941                                                                                                                                                                                                                                                                                                                     |
| Article Type:                 | Original research                                                                                                                                                                                                                                                                                                                       |
| Date Submitted by the Author: | 31-Jul-2021                                                                                                                                                                                                                                                                                                                             |
| Complete List of Authors:     | We, Bo; The people's hospital of Neijiang Dongxing District, Emergency Department<br>Huang, Shuang; The people's hospital of Neijiang Dongxing District, Emergency Department<br>Ma, Huan; Sichuan Vocational College of Health and Rehabilitation, nursing department<br>Zhong, Ying; Central South University, Xiangya Nursing School |
| Keywords:                     | Adult psychiatry < PSYCHIATRY, PUBLIC HEALTH, MENTAL HEALTH, Depression & mood disorders < PSYCHIATRY                                                                                                                                                                                                                                   |
|                               |                                                                                                                                                                                                                                                                                                                                         |

SCHOLARONE™  
Manuscripts

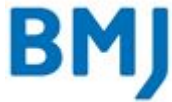

I, the Submitting Author has the right to grant and does grant on behalf of all authors of the Work (as defined in the below author licence), an exclusive licence and/or a non-exclusive licence for contributions from authors who are: i) UK Crown employees; ii) where BMJ has agreed a CC-BY licence shall apply, and/or iii) in accordance with the terms applicable for US Federal Government officers or employees acting as part of their official duties; on a worldwide, perpetual, irrevocable, royalty-free basis to BMJ Publishing Group Ltd ("BMJ") its licensees and where the relevant Journal is co-owned by BMJ to the co-owners of the Journal, to publish the Work in this journal and any other BMJ products and to exploit all rights, as set out in our [licence](#).

The Submitting Author accepts and understands that any supply made under these terms is made by BMJ to the Submitting Author unless you are acting as an employee on behalf of your employer or a postgraduate student of an affiliated institution which is paying any applicable article publishing charge ("APC") for Open Access articles. Where the Submitting Author wishes to make the Work available on an Open Access basis (and intends to pay the relevant APC), the terms of reuse of such Open Access shall be governed by a Creative Commons licence – details of these licences and which [Creative Commons](#) licence will apply to this Work are set out in our licence referred to above.

Other than as permitted in any relevant BMJ Author's Self Archiving Policies, I confirm this Work has not been accepted for publication elsewhere, is not being considered for publication elsewhere and does not duplicate material already published. I confirm all authors consent to publication of this Work and authorise the granting of this licence.

# Association between compassion fatigue and depression among emergency medical staff in China: a cross-sectional study

Bo We<sup>1</sup>, Shuang-quan Huang<sup>1</sup>, Huan Ma<sup>2</sup>, Ying Zhong<sup>3</sup>

<sup>1</sup>Emergency Department, The people's hospital of Neijiang Dongxing District, Neijiang, Sichuan, China

<sup>2</sup>Sichuan Vocational College of Health and Rehabilitation, Zigong, Sichuan, China

<sup>3</sup>Xiangya Nursing School, Central South University, Changsha, Hunan, China

## Corresponding author

Correspondence should be addressed to: Huan Ma, Nursing Department, Sichuan Vocational College of Health and Rehabilitation, Zigong, Sichuan, China. email: ab18782981370@163.com

## Abstract

**Objectives:** Medical staff in emergency departments are at high risk of compassion fatigue and depression. The purpose of this study was to examine the relationship between compassion fatigue and depression among emergency department staff members.

**Design:** A cross-sectional study.

**Setting:** This study was conducted in five tertiary hospitals in five different cities across Sichuan province, China, in 2021.

**Participants:** A total of 342 emergency medical staff participated in the study.

**Main outcome measures:** Compassion fatigue and depression scores.

**Results:** Among the 342 emergency medical staff, 100% were found to have depressive symptoms, 27.8% had low compassion satisfaction, 2.3% had high burnout and 3.8% had secondary traumatic stress. In the final multiple linear regression model, marital status ( $p=0.008$ ; 95% confidence interval [CI],  $-5.205$  to  $-0.789$ ), history of

1  
2  
3  
4 chronic disease ( $p=0.003$ ; 95% CI,  $-6.461$  to  $-1.386$ ), compassion satisfaction  
5  
6 ( $p<0.001$ ; 95% CI,  $0.593$  to  $1.274$ ), burnout ( $p=0.019$ ; 95% CI,  $0.084$  to  $0.930$ ) and  
7  
8 secondary traumatic stress ( $p<0.001$ ; 95% CI,  $-1.527$  to  $-1.053$ ) among the  
9  
10 emergency medical staff were considered to be significant predictors of depression.  
11  
12

13  
14 **Conclusions:** The prevalence of depression among emergency medical staff is high in  
15  
16 China. Compassion fatigue was significantly and meaningfully associated with  
17  
18 depression among emergency medical staff. Hospital administrations should consider  
19  
20 these findings to prevent depression among Chinese medical staff in emergency  
21  
22 departments.  
23  
24  
25

26  
27 **Keywords:** compassion fatigue, depression, emergency department  
28  
29

### 30 **Strengths and limitations of this study**

- 31  
32  
33 •This is a novel study conducted in China, which describes the prevalence of  
34  
35 compassion fatigue and depression and the influencing factors associated with  
36  
37 depression among medical staff in emergency departments.  
38  
39  
40 •The causal association between compassion fatigue and depression could not be  
41  
42 established since this was a cross-sectional study.  
43  
44  
45 •Data on compassion fatigue and depression were collected based on the participants'  
46  
47 self-reports, which may have led to information bias.  
48  
49

### 50 **Introduction**

51  
52  
53 Emergency departments are fast-paced, high-pressure environments in which the  
54  
55 medical staff encounter heavy workloads, violence, interpersonal conflict, high  
56  
57 patient load, mass casualty incidents; moreover, limited resources and poor skill mix  
58  
59  
60

1  
2  
3  
4 compound the problem.<sup>1 2</sup> Emergency clinical staff who are at the frontline of a  
5  
6 demanding health care system take significant responsibility for the care of  
7  
8 emergencies, regardless of overstretched and overburdened resources.<sup>3</sup> Emergency  
9  
10 medical staff who witness alarming morbidity and mortality on a daily basis, can  
11  
12 experience adverse physical and mental health problems, such as compassion fatigue,  
13  
14 depression and burnout.<sup>4</sup> It has been reported that compassion fatigue and depression  
15  
16 afflicting emergency medical staff can not only harm individual mental health, but  
17  
18 can also cause a series of fateful consequences, including medical errors, poor-quality  
19  
20 patient care and increased patient mortality during hospital stay.<sup>5 6</sup>  
21  
22  
23  
24  
25  
26

27  
28 Compassion fatigue, which is considered as an occupational hazard in healthcare,  
29  
30 is conceptualized as “the natural, consequent behaviors and emotions resulting from  
31  
32 knowing about a traumatizing event experienced by a significant other – the stress  
33  
34 resulting from helping or wanting to help a traumatized or suffering person”.<sup>7 8</sup>  
35  
36 According to Stamm,<sup>22</sup> compassion fatigue is described as the combination of low  
37  
38 compassion, high burnout and secondary traumatic stress. Compassion fatigue can  
39  
40 result in a series of physical, mental and work-related symptoms that seriously affect  
41  
42 quality of patient care and staff-patient relationships.<sup>9</sup> Chu reported that compassion  
43  
44 fatigue has a significant negative effect on job performance and organisational  
45  
46 citizenship behavior.<sup>10</sup> A study conducted on Chinese dialysis nurses indicated that  
47  
48 compassion fatigue had a significant effect on turnover intention.<sup>11</sup> Barnett et al. noted  
49  
50 that compassion fatigue was positively associated with emotional display.<sup>12</sup>  
51  
52  
53  
54  
55  
56  
57

58  
59 Depression, a common and serious mental illness, is listed by the World Health  
60

1  
2  
3  
4 Organization (WHO) as one of the most important factors contributing to global  
5  
6 disability and the main contributor to suicide deaths at all ages.<sup>13</sup> The most common  
7  
8 symptoms associated with depression are persistent sadness, a loss of interest and  
9  
10 energy, insomnia, headache, unexplained pain, gastrointestinal symptoms,  
11  
12 hopelessness and thoughts of self-harm or suicide.<sup>14</sup> Serious depression can lead to  
13  
14 many negative psychosocial outcomes. For example, a recent study on psychiatry  
15  
16 residents in Saudi Arabia showed that there was a significant relationship between  
17  
18 depressive symptoms and burnout.<sup>15</sup> Fisher et al. found that higher levels of  
19  
20 depressive symptoms was significantly associated with higher levels of fatigue and  
21  
22 pain interference.<sup>16</sup> Emergency medical staff are exposed to all kinds of stress every  
23  
24 day.<sup>17</sup> Hence, special attention should be paid to the psychological status of  
25  
26 emergency clinical staff.  
27  
28  
29  
30  
31  
32  
33

34  
35 Although extensive studies on depression have been conducted, most of the  
36  
37 studies have focused on university students and patients rather than emergency  
38  
39 medical staff.<sup>18-21</sup> Considering that emergency medical staff have emotionally  
40  
41 demanding tasks and work in high-pressure situations, the aim of this study was to  
42  
43 determine the prevalence of compassion fatigue and depression and explore their  
44  
45 relationship among this highly vulnerable population.  
46  
47  
48  
49

## 50 **Methods**

### 51 **Study design and participants**

52  
53 A cross-sectional survey was carried out across five different cities of Sichuan  
54  
55 province, China. A convenience sample was used to recruit doctors and registered  
56  
57  
58  
59  
60

nurses working in the emergency department. The eligibility criteria were as follows: (1) being licensed doctors and registered nurses; (2) with more than one years' work experience; (3) working in emergency department ; (4) consented to participate. The data were collected by five trained research assistants from January to February 2021. A set of questionnaires was distributed to all emergency medical staff by the five tertiary hospitals' administration. All the participants were informed that their participation was voluntary and that their data would be anonymised. A total of 350 emergency medical staff filled in the questionnaires, out of which 342 questionnaires were returned (an effective response rate of 97.7%).

### **Measurements**

The questionnaire comprised three instruments: a demographic survey, the Professional Quality of Life (ProQOLv5) scale and the Center for Epidemiologic Studies Depression (CES-D) scale. Sociodemographic data, including position, age, gender, marital status, education level, professional title, work experience, shifts worked, daily work hours, cigarette use, alcohol use and history of chronic disease, were collected.

### **Professional quality of life scale**

Compassion fatigue levels were assessed using the ProQOLv5. The questionnaire includes 30 items with a Likert scale of 5 points (1=never; 5=always), 10 items for compassion satisfaction, 10 items for burnout and 10 items for secondary traumatic stress.<sup>22</sup> The total score range for each subscale is 5–50, with higher scores on burnout and secondary traumatic stress indicating more severe compassion fatigue.



1  
2  
3  
4 For compassion satisfaction, lower scores represent higher compassion fatigue. The  
5  
6 alpha reliability coefficients for compassion satisfaction, burnout and secondary  
7  
8 traumatic stress were 0.775, 0.775 and 0.807, respectively.  
9  
10

## 11 **Depression**

12  
13  
14 The CES-D is a 20-item questionnaire intended to measure the frequency of  
15  
16 occurrence of symptoms of depression over the past week using a 5-point Likert scale  
17  
18 (each item was scored as follows: 0=rarely or none of the time to 3=most or all of the  
19  
20 time; total score range, 0–60).<sup>23</sup> The CES-D scale has four reverse-scored items (items  
21  
22 4, 8, 12 and 16) and covers four major symptoms of depression, including depressed  
23  
24 affect, somatic symptoms, positive affect and inter-personal relations. Standard  
25  
26 cut-off value  $\geq 16$  indicates the likely presence of depression. The Cronbach's  $\alpha$  in the  
27  
28 current study was 0.916.  
29  
30  
31  
32  
33

## 34 **Statistical analysis**

35  
36  
37 Statistical analysis was conducted using SPSS version 22.0 (SPSS Inc., Chicago,  
38  
39 IL, USA). Continuous variables were summarised as mean with standard deviation  
40  
41 (SD), while categorical variables were presented as frequencies and percentages.  
42  
43 Independent samples t-test, and one-way analysis of variance (ANOVA) were used to  
44  
45 compare participants' depression by demographic characteristics. The association  
46  
47 between compassion fatigue and depression among emergency medical staff was  
48  
49 analysed using Pearson's correlation analysis. A multiple linear regression model was  
50  
51 used to estimate the effect of compassion fatigue and other demographic variables on  
52  
53 depression. A *p* value of less than 0.05 was considered statistically significant  
54  
55  
56  
57  
58  
59  
60

(two-tailed).

## Patient and public involvement

Patients or members of the public were not involved in the design, reporting or dissemination plans of our research.

## Results

The participants' baseline characteristics are shown in Table 1. The mean age was 32.59 years (SD, 8.19; age range, 20–58 years). Most participants were female (70.5%), nurses (71.1%), married (68.7.0%), held a bachelor degree (62.9%) and had a primary professional title (57.0%).

The differences in depression scores according to the characteristics of emergency medical staff are also presented in Table 1. There were significant differences in depression scores based on marital status ( $p<0.01$ ), professional title ( $p<0.05$ ), daily work hours ( $p<0.05$ ), alcohol use ( $p<0.05$ ) and history of chronic disease ( $p<0.01$ ).

As depicted in Table 2, compassion satisfaction levels were moderate in approximately 70.8% of the emergency medical staff, low in 27.8% of them and high in 1.4% of them. Of the participants, 2.3% had a high burnout score, 66 (19.3%) had a low burnout score and 3% of the respondents had a high secondary traumatic stress score. The mean scores for depression, compassion satisfaction, burnout and secondary traumatic stress were 37.36 (SD, 10.91), 26.70 (SD, 6.36), 27.74 (SD, 6.19) and 30.19 (SD, 6.59), respectively.

Both compassion satisfaction and burnout were significantly correlated with

1  
2  
3  
4 three depression metrics: depressed affect, somatic symptoms and inter-personal  
5  
6 relations. Apart from positive affect, there was no relationship between the other  
7  
8 sub-scales of depression and secondary traumatic stress (Table 3).  
9  
10

11  
12 Depression was computed as outcome variable, and the independent variables  
13  
14 comprised the demographic characteristics and the three dimensions of compassion  
15  
16 fatigue. Table 4 shows that marital status, history of chronic disease, compassion  
17  
18 satisfaction, burnout and secondary traumatic stress collectively accounted for 39.6%  
19  
20 of the variance in depression ( $F = 28.952, p < 0.001, R^2 = 0.410, \text{adjusted } R^2 = 0.396$ ).  
21  
22  
23

## 24 25 **Discussion**

26  
27 The findings of the current study regarding the frequency and distribution of  
28  
29 depression among emergency medical staff show that the following characteristics  
30  
31 were significantly associated with higher levels of depression—marital status:  
32  
33 unmarried; intermediate professional title; consumption of alcohol; daily worktime  
34  
35 between 9 and 12 hours; and a history of chronic disease. Similar to our study, a  
36  
37 statistically significant difference was observed in the levels of depression among  
38  
39 breast cancer patients in Serbia with regard to marital status.<sup>24</sup> One reason for this  
40  
41 could be that spousal support is beneficial for maintaining good mental health.<sup>25</sup> Our  
42  
43 findings concur with those of Xiao et al. who found that depression levels were  
44  
45 different among different professional titles and that an intermediate title was an  
46  
47 independent influencing factor.<sup>26</sup> This could be explained by the fact that compared to  
48  
49 medical staff with an intermediate title, doctors and nurses with a senior title have a  
50  
51 richer work experience, a higher income and a lower family burden.<sup>27</sup> The findings of  
52  
53  
54  
55  
56  
57  
58  
59  
60

1  
2  
3  
4 this study are in accordance with those of two previous studies that reported that  
5  
6 working excessively long hours on a daily basis was significantly associated with the  
7  
8 frequency of depressive symptoms.<sup>28 29</sup> Emergency medical staff endure a heavy  
9  
10 burden of work imposed on them on a daily basis and most often without a day of  
11  
12 safety rest. Work overload and chronic sleep deprivation can increase the risk for  
13  
14 serious mental illness.<sup>30</sup> A study conducted by Luo et al. among 5,294 outpatients in  
15  
16 China noted that drinking alcohol was a risk factor for depressive symptoms; this is in  
17  
18 line with our research.<sup>31</sup> The possible explanation for this finding is that emergency  
19  
20 medical staff who encounter psychological problems resort to drinking alcohol to  
21  
22 reduce their mental stress and as a means of escape from reality. Thus, consumption  
23  
24 of alcohol and depressive symptoms interact to form a vicious cycle.<sup>32</sup> Our results are  
25  
26 also similar to those reported in a study by Ngasa et al. that found that the presence of  
27  
28 a chronic disease was independently associated with depression.<sup>33</sup>  
29  
30  
31  
32  
33  
34  
35  
36  
37

38 Our study found a considerably high prevalence of depressive symptoms among  
39  
40 emergency medical staff, and the prevalence of depressive symptoms reached up to  
41  
42 100%, which is much higher than the incidence of 12.1% reported in caregivers of  
43  
44 children with osteogenesis imperfecta.<sup>34</sup> The high level of depression may be  
45  
46 associated with factors, such as excessive workload, overcrowding and resource  
47  
48 shortages in the emergency department.<sup>35</sup> Levels of burnout and secondary traumatic  
49  
50 stress were much higher than that reported in previous studies, with emergency  
51  
52 department doctors and nurses in this sample showing significantly lower levels of  
53  
54 compassion satisfaction.<sup>36 37</sup> Compared to nurse leaders and surgical trainees,  
55  
56  
57  
58  
59  
60

1  
2  
3  
4 emergency medical staff often take on more work and have higher levels of  
5  
6 psychological stress.<sup>38</sup>  
7  
8

9 We found that compassion fatigue had a statistically significant correlation with  
10 depression. The current study shows that compassion satisfaction and burnout have a  
11 significant positive correlation with depression and secondary traumatic stress has a  
12 significant positive correlation with depression and secondary traumatic stress has a  
13 significant negative correlation with depression, which is in partial agreement with  
14 other recent studies. Jo et al. and Hegney et al. both found an opposite association,  
15 that is, compassion satisfaction was negatively associated with depression and  
16 secondary traumatic stress was positively correlated with depression.<sup>39 40</sup> One possible  
17 reason for this discrepancy is that the tools for measurement of depression were  
18 different.  
19  
20  
21  
22  
23  
24  
25  
26  
27  
28  
29  
30  
31  
32

### 33 **Limitations of the current study**

34  
35 Our study has a few limitations. First, our study sample was drawn from a single  
36 Chinese region with predominantly emergency medical staff and adopted the method  
37 of convenient sampling, which limits the generalisability of the findings to other  
38 professional groups. Second, most of the instruments used in this research were based  
39 on the respondents' self-reports, which is prone to information bias. Therefore, more  
40 robust methods of assessment and better tools should be used in future studies. Third,  
41 the causal association between compassion fatigue and depression is not clear, due to  
42 the cross-sectional study nature of our study. Hence, we recommend that future  
43 research should examine the interaction between compassion fatigue and depression  
44 and evaluate their potential impact rather than focusing on these phenomena  
45  
46  
47  
48  
49  
50  
51  
52  
53  
54  
55  
56  
57  
58  
59  
60

1  
2  
3  
4 separately. Lastly, compassion fatigue, in our study, merely contributed to (did not  
5  
6 cause) increase in depression. While the findings of our study have the potential to  
7  
8 provide new directions and perspectives for future research, it is crucial to realize that  
9  
10 depression is often multifactorial.  
11  
12

## 13 14 **Conclusion**

15  
16  
17 The prevalence of depression among Chinese emergency medical staff was  
18  
19 shown to be extremely high. Marital status and the presence of a chronic disease  
20  
21 among the staff affected their depression levels. We also examined the relationship  
22  
23 between compassion fatigue and depression among emergency medical staff in China,  
24  
25 and found a significant association between them. Moreover, it was also determined  
26  
27 that independent variables, such as compassion satisfaction, burnout and secondary  
28  
29 traumatic stress strongly predict depression levels among the emergency medical staff.  
30  
31 Consequently, reducing the level of compassion fatigue could be a key factor in  
32  
33 addressing depression in emergency department doctors and nurses.  
34  
35  
36  
37  
38  
39

## 40 **Acknowledgements**

41  
42  
43 We would like to thank all emergency medical staff who completed  
44  
45 questionnaires for their unbiased participation; we gratefully acknowledge the  
46  
47 contributions by the hospital administrators of the five hospitals and thank them for  
48  
49 their efforts and time.  
50  
51

## 52 **Contributors**

53  
54  
55 BW wrote the manuscript and conducted the statistical analysis and  
56  
57 interpretation; HM was responsible for conceptualisation and design of the study; and  
58  
59  
60

1  
2  
3  
4 SQH and YZ were in charge of data acquisition. All authors revised and approved the  
5  
6 final manuscript.  
7  
8

### 9 **Funding**

10  
11 No financial support was received to conduct this study.  
12  
13

### 14 **Competing interests**

15  
16 None declared.  
17  
18

### 19 **Patient consent for publication**

20  
21 Not required.  
22  
23

### 24 **Ethics approval**

25  
26 The study was approved by the Institutional Review Board of of Xiangya  
27  
28 Nursing School, Central South University, China.  
29  
30

### 31 **Data availability statement**

32  
33 Data are available upon reasonable request.  
34  
35

### 36 **REFERENCES**

- 37  
38  
39  
40 1 Johnston A, Abraham L, Greenslade J, et al. Review article: Staff perception of the  
41  
42 emergency department working environment: Integrative review of the literature.  
43  
44 Emerg Med Australas 2016;28(1):7-26.  
45  
46  
47  
48 2 Rasmus P, Marcinkowska W, Cieleban N, et al. Workload and coping with stress  
49  
50 and the health status of emergency medical staff in the context of work-life balance.  
51  
52 Med Pr 2020;71(5):587-93.  
53  
54  
55  
56 3 Elder EG, Johnston A, Wallis M, et al. Work-based strategies/interventions to  
57  
58 ameliorate stressors and foster coping for clinical staff working in emergency  
59  
60

- 1  
2  
3  
4 departments: a scoping review of the literature. *Australas Emerg Care*  
5  
6 2020;23(3):181-92.  
7  
8
- 9 4 Sawe HR, Murray B, Jamieson J. Compassion fatigue in emergency providers:  
10  
11 Experiences from Sub-Saharan Africa. *Emerg Med Australas* 2016 ;28(1):109-11.  
12  
13
- 14 5 Mata DA, Ramos MA, Bansal N, et al. Prevalence of Depression and Depressive  
15  
16 Symptoms Among Resident Physicians: A Systematic Review and Meta-analysis.  
17  
18 *JAMA* 2015;314(22):2373-83.  
19  
20
- 21  
22 6 O'Callaghan EL, Lam L, Cant R, et al. Compassion satisfaction and compassion  
23  
24 fatigue in Australian emergency nurses: A descriptive cross-sectional study. *Int*  
25  
26 *Emerg Nurs* 2020; 48:100785.  
27  
28
- 29  
30 7 Borges EMDN, Fonseca CINDS, Baptista PCP, et al. Compassion fatigue among  
31  
32 nurses working on an adult emergency and urgent care unit. *Rev Lat Am*  
33  
34 *Enfermagem* 2019; 27: e3175.  
35  
36
- 37  
38 8 Deering D. Compassion Fatigue: coping with secondary traumatic stress disorder in  
39  
40 those who treat the traumatized. *Journal of Psychosocial Nursing & Mental Health*  
41  
42 *Services* 1996;34(11):52.  
43  
44
- 45  
46 9 Sorenson C, Bolick B, Wright K, et al. Understanding Compassion Fatigue in  
47  
48 Healthcare Providers: A Review of Current Literature. *J Nurs Scholarsh*  
49  
50 2016;48(5):456-65.  
51  
52
- 53  
54 10 Chu LC. The Influence of Compassion Fatigue on Job Performance and  
55  
56 Organizational Citizenship Behaviors: The Moderating Effect of Person-Job Fit. *J*  
57  
58 *Nurs Scholarsh* 2021;53(4):500-10.  
59  
60



- 1  
2  
3  
4 11 Cao X, Chen L. The impact of resilience on turnover intention in dialysis nurses:  
5  
6 The mediating effects of work engagement and compassion fatigue. *Jpn J Nurs Sci*  
7  
8  
9 2021;4: e12414.  
10  
11  
12 12 Barnett MD, Hays KN, Cantu C. Compassion fatigue, emotional labor, and  
13  
14 emotional display among hospice nurses. *Death Stud* 2019; 9:1-7.  
15  
16  
17 13 World Health Organization. Depression and other common mental disorders:  
18  
19 global health estimates, 2017. Available:  
20  
21 <https://www.who.int/publications/i/item/depression-global-health-estimates>  
22  
23 [accessed 3 Jan 2017].  
24  
25  
26  
27 14 J Priyadarshini. Depression-Let's Talk, 2017. Available:  
28  
29 [http://www.who.int/campaigns/world-health-day/2017/handouts-depression/what-y](http://www.who.int/campaigns/world-health-day/2017/handouts-depression/what-you-should-know-01.pdf?ua=1.pdf)  
30  
31 [ou-should-know-01.pdf?ua=1.pdf](http://www.who.int/campaigns/world-health-day/2017/handouts-depression/what-you-should-know-01.pdf?ua=1.pdf) [accessed 7 Apr 2017].  
32  
33  
34  
35 15 Alkhamees AA, Assiri H, Alharbi HY, et al. Burnout and depression among  
36  
37 psychiatry residents during COVID-19 pandemic. *Hum Resour Health*  
38  
39 2021;19(1):46.  
40  
41  
42  
43 16 Fisher HM, Winger JG, Miller SN, et al. Relationship between social support,  
44  
45 physical symptoms, and depression in women with breast cancer and pain. *Support*  
46  
47 *Care Cancer* 2021; 2:1-9  
48  
49  
50  
51 17 Crilly J, Greenslade J, Lincoln C, et al. Measuring the impact of the working  
52  
53 environment on emergency department nurses: A cross-sectional pilot study. *Int*  
54  
55 *Emerg Nurs* 2017; 31:9-14.  
56  
57  
58  
59 18 Tang Z, Feng S, Lin J. Depression and its correlation with social support and  
60

- 1  
2  
3  
4 health-promoting lifestyles among Chinese university students: a cross-sectional  
5  
6 study. *BMJ Open* 2021;11(7): e044236.  
7  
8  
9 19 Musa A, Ashraf J, Tsai FJ, et al. Depression Severity and Depression Stigma  
10  
11 Among Students: A Survey of Universities in Five Countries. *J Nerv Ment Dis*  
12  
13 2020;208(11):884-89.  
14  
15  
16 20 Mukherjee N, Chaturvedi SK. Depressive symptoms and disorders in type 2  
17  
18 diabetes mellitus. *Curr Opin Psychiatry* 2019;32(5):416-21.  
19  
20  
21 21 Huang M, Liu Y, Wang J, et al. High rates of depression anxiety and suicidal  
22  
23 ideation among inpatients in general hospital in China. *Int J Psychiatry Clin Pract*  
24  
25 2019;23(2):99-105.  
26  
27  
28  
29 22 Stamm B. The concise ProQOL manual. 2nd ed. Pocatello, ID: ProQOL.org. 2010.  
30  
31  
32 23 Radloff LS. The CES-D scale: a self-report depression scale for research in the  
33  
34 general population. *Appl Psychol Meas* 1977; 1:385-401.  
35  
36  
37 24 Cvetković J, Nenadović M. Depression in breast cancer patients. *Psychiatry Res*  
38  
39 2016; 240: 343-347.  
40  
41  
42 25 Leong OS, Ghazali S, Hussin EOD, et al. Depression among older adults in  
43  
44 Malaysian daycare centres. *Br J Community Nurs* 2020;25(2):84-90.  
45  
46  
47 26 Xiao X, Zhu X, Fu S, et al. Psychological impact of healthcare workers in China  
48  
49 during COVID-19 pneumonia epidemic: A multi-center cross-sectional survey  
50  
51 investigation. *J Affect Disord* 2020; 274:405-410.  
52  
53  
54 27 Wang Y, Wang P. Perceived stress and psychological distress among chinese  
55  
56 physicians: The mediating role of coping style. *Medicine (Baltimore)* 2019;98(23):  
57  
58  
59  
60

- 1  
2  
3  
4 e15950.  
5  
6  
7 28 Alva-Diaz C, Nieto-Gutierrez W, Taype-Rondan A, et al. Association between  
8  
9 daily working hours and depressive symptoms in resident physicians in Peru. *Rev*  
10  
11 *Colomb Psiquiatr (Engl Ed)* 2021;50(1):22-28.  
12  
13  
14 29 Ogawa R, Seo E, Maeno T, et al. The relationship between long working hours and  
15  
16 depression among first-year residents in Japan. *BMC Med Educ* 2018;18(1):50.  
17  
18  
19 30 Marzouk M, Ouanes-Besbes L, Ouanes I, et al. Prevalence of anxiety and  
20  
21 depressive symptoms among medical residents in Tunisia: a cross-sectional survey.  
22  
23 *BMJ Open* 2018;8(7): e020655.  
24  
25  
26  
27 31 Luo X, Ke X, Li H, et al. Prevalence and risk factors for depression in outpatient  
28  
29 departments of three general hospitals in China: a cross-sectional study. *Int J*  
30  
31 *Psychiatry Clin Pract* 2020;24(1):88-95.  
32  
33  
34  
35 32 Tran TD, Hammarberg K, Kirkman M, et al. Alcohol use and mental health status  
36  
37 during the first months of COVID-19 pandemic in Australia. *J Affect Disord* 2020;  
38  
39 277:810-13.  
40  
41  
42  
43 33 Ngasa SN, Sama CB, Dzekem BS, et al. Prevalence and factors associated with  
44  
45 depression among medical students in Cameroon: a cross-sectional study. *BMC*  
46  
47 *Psychiatry* 2017;17(1):216.  
48  
49  
50  
51 34 Lazow MA, Jaser SS, Cobry EC, et al. Stress, Depression, and Quality of Life  
52  
53 Among Caregivers of Children with Osteogenesis Imperfecta. *J Pediatr Health*  
54  
55 *Care* 2019;33(4):437-45.  
56  
57  
58  
59 35 Crilly J, Greenslade JH, Johnston A, et al. Staff perceptions of the emergency  
60

1  
2  
3  
4 department working environment: An international cross-sectional survey. *Emerg*  
5  
6 *Med Australas* 2019;31(6):1082-91.

7  
8  
9 36 Seemann NM, Karanicolas PJ, Guttman MP, et al. Compassion Fatigue in Surgical  
10  
11 Trainees. *J Surg Educ* 2019;76(5):1211-22.

12  
13  
14 37 Kelly LA, Lefton C, Fischer SA. Nurse Leader Burnout, Satisfaction, and  
15  
16 Work-Life Balance. *J Nurs Adm* 2019;49(9):404-10.

17  
18  
19 38 Xu HG, Johnston ANB, Greenslade JH, et al. Stressors and coping strategies of  
20  
21 emergency department nurses and doctors: A cross-sectional study. *Australas*  
22  
23 *Emerg Care*. 2019;22(3):180-86.

24  
25  
26  
27 39 Jo M, Na H, Jung YE. Mediation Effects of Compassion Satisfaction and  
28  
29 Compassion Fatigue in the Relationships Between Resilience and Anxiety or  
30  
31 Depression Among Hospice Volunteers. *J Hosp Palliat Nurs* 2020;22(3):246-53.

32  
33  
34  
35 40 Hegney DG, Craigie M, Hemsworth D, et al. Compassion satisfaction, compassion  
36  
37 fatigue, anxiety, depression and stress in registered nurses in Australia: study 1  
38  
39 results. *J Nurs Manag* 2014;22(4):506-18.  
40  
41  
42  
43  
44  
45  
46  
47  
48  
49  
50  
51  
52  
53  
54  
55  
56  
57  
58  
59  
60

**Table 1. Demographic characteristics of emergency medical staff (N=342).**

| Variables               | N (%)      | Depression<br>Mean (SD) |
|-------------------------|------------|-------------------------|
| Position                |            | <i>P</i> =0.181         |
| Doctor                  | 99(28.9)   | 38.60(11.76)            |
| Nurse                   | 243(71.1)  | 36.86(10.52)            |
| Age (years)             |            | <i>P</i> =0.991         |
| <35                     | 236(69.0)  | 37.37(10.23)            |
| ≥35                     | 106(31.0)  | 37.35(12.32)            |
| Gender                  |            | <i>P</i> =0.162         |
| Male                    | 101(29.5)  | 38.64(12.22)            |
| Female                  | 241(70.5)  | 36.83(10.28)            |
| Marital status          |            | <i>P</i> =0.002         |
| Unmarried               | 107(31.3)  | 40.01(11.05)            |
| Married                 | 235(68.7)  | 36.16(10.64)            |
| Education level         |            | <i>P</i> =0.071         |
| Associate degree        | 102(29.8)  | 36.16(9.97)             |
| Bachelor degree         | 215(62.9)  | 38.33(11.49)            |
| Master degree           | 25(7.3)    | 34.00(8.24)             |
| Profession title        |            | <i>P</i> =0.034         |
| Primary                 | 195(57.0)  | 37.57(10.56)            |
| Intermediate            | 108(31.6)  | 38.48(11.51)            |
| Senior                  | 39(11.4)   | 33.25(10.18)            |
| Work experience (years) |            | <i>P</i> =0.810         |
| <5                      | 94(27.5)   | 37.48(10.09)            |
| 5-10                    | 95(27.8)   | 37.88(10.96)            |
| >10                     | 153 (44.7) | 36.97(11.39)            |
| Weekly night shifts     |            | <i>P</i> =0.063         |
| 0                       | 46(13.5)   | 33.60(9.35)             |
| 1-2                     | 148(43.4)  | 37.89(11.19)            |
| 3-4                     | 106(31.0)  | 37.46(11.10)            |
| >4                      | 42(12.3)   | 39.40(10.35)            |
| Daily work hours(h)     |            | <i>P</i> =0.017         |
| <9                      | 161(47.1)  | 35.60(10.29)            |
| 9-12                    | 118(34.5)  | 39.19(11.13)            |
| >12                     | 163(18.4)  | 38.44(11.45)            |
| Cigarette use           |            | <i>P</i> =0.244         |
| Yes                     | 38(11.1)   | 39.31(12.13)            |
| No                      | 304(88.9)  | 37.12(10.74)            |
| Alcohol use             |            | <i>P</i> =0.019         |

|                            |           |              |
|----------------------------|-----------|--------------|
| Yes                        | 50(14.6)  | 40.70(10.91) |
| No                         | 292(85.4) | 36.79(10.82) |
| History of chronic disease |           | $P=0.001$    |
| Yes                        | 58(17.0)  | 41.79(12.21) |
| No                         | 284(83.0) | 36.46(10.41) |

**Table 2. Depression and compassion fatigue levels among emergency medical staff (N=342).**

| Dimensions                 | N (%)     | Mean  | SD    |
|----------------------------|-----------|-------|-------|
| Depression                 |           | 37.36 | 10.91 |
| Compassion satisfaction    |           | 26.70 | 6.36  |
| Low                        | 95(27.8)  | -     | -     |
| Medium                     | 242(70.8) | -     | -     |
| High                       | 5(1.4)    | -     | -     |
| Burnout                    |           | 27.74 | 6.19  |
| Low                        | 66(19.3)  | -     | -     |
| Medium                     | 268(78.4) | -     | -     |
| High                       | 8(2.3)    | -     | -     |
| Secondary traumatic stress |           | 30.19 | 6.59  |
| Low                        | 43(12.6)  | -     | -     |
| Medium                     | 286(83.6) | -     | -     |
| High                       | 13(3.8)   | -     | -     |

**Table 3. Correlations between dimensions of depression and compassion fatigue (N=342).**

|                            | Depression | Depressed Affect | Somatic | Positive Affect | Inter-personal |
|----------------------------|------------|------------------|---------|-----------------|----------------|
| Compassion satisfaction    | 0.282**    | 0.319**          | 0.317** | 0.003           | 0.311**        |
| Burnout                    | 0.171**    | 0.214**          | 0.239** | -0.163**        | 0.247**        |
| Secondary traumatic stress | -0.178**   | -0.092           | -0.021  | -0.430**        | 0.001          |

Note:\*\* $p < 0.01$

**Table 4. Multiple linear regression analysis of depression (N=342).**

| Dependent variables | Independent variables      | Unstandardised coefficient |       | Standardised coefficient | $t$    | $P$   | 95% CI      |             |
|---------------------|----------------------------|----------------------------|-------|--------------------------|--------|-------|-------------|-------------|
|                     |                            | B                          | SE    | Beta                     |        |       | Lower bound | Upper bound |
| Depression          | Marital status             | -2.997                     | 1.123 | -0.128                   | -2.670 | 0.008 | -5.205      | -0.789      |
|                     | History of chronic disease | -3.924                     | 1.290 | -0.135                   | -3.052 | 0.003 | -6.461      | -1.386      |

1  
2  
3  
4  
5  
6  
7  
8  
9  
10  
11  
12  
13  
14  
15  
16  
17  
18  
19  
20  
21  
22  
23  
24  
25  
26  
27  
28  
29  
30  
31  
32  
33  
34  
35  
36  
37  
38  
39  
40  
41  
42  
43  
44  
45  
46  
47  
48  
49  
50  
51  
52  
53  
54  
55  
56  
57  
58  
59  
60

---

|                            |        |       |        |         |        |        |        |
|----------------------------|--------|-------|--------|---------|--------|--------|--------|
| Compassion satisfaction    | 0.934  | 0.173 | 0.545  | 5.388   | <0.001 | 0.593  | 1.274  |
| Burnout                    | 0.507  | 0.215 | 0.288  | 2.359   | 0.019  | 0.084  | 0.930  |
| Secondary traumatic stress | -1.290 | 0.120 | -0.779 | -10.707 | <0.001 | -1.527 | -1.053 |

---

For peer review only

**IJNS AUTHOR CHECKLIST** *Authors of all papers should submit this checklist together with their manuscript. The checklist will be made available during the submission process online to all authors and full step-by-step guidance given.*

*Part 1 identifies basic requirements for the manuscript submission (mandatory for all submissions)*

*Part 2 identifies recognized guidelines for scientific reporting, which you should use to prepare your manuscript (required for systematic reviews and original research)*

*Part 3 is a self assessment checklist that is designed to help to ensure that your research or review manuscript meets basic standards and the journal's Guide for Authors. (optional only)*

| <b>PART 1 Basic requirements</b>                                                       | <b>Author response or further detail</b>                                                                                                                                                                                                                                                                                                                                                          | <b>Tick</b> |
|----------------------------------------------------------------------------------------|---------------------------------------------------------------------------------------------------------------------------------------------------------------------------------------------------------------------------------------------------------------------------------------------------------------------------------------------------------------------------------------------------|-------------|
| Word count                                                                             | 3962                                                                                                                                                                                                                                                                                                                                                                                              |             |
| Was ethical approval given and by whom? (give any reference number)                    | the Institutional Review Board of Xiangya Nursing School, Central South University (Approval number E202062)                                                                                                                                                                                                                                                                                      |             |
| Please state any conflicts of interest                                                 | None                                                                                                                                                                                                                                                                                                                                                                                              |             |
| Please state sources of funding and the role of funders in the conduct of the research | None                                                                                                                                                                                                                                                                                                                                                                                              |             |
| Please state any study registry number (e.g. ISRCTN)                                   | Not applicable                                                                                                                                                                                                                                                                                                                                                                                    |             |
| Title                                                                                  | The title is in the format 'Topic / question: design/type of paper' and identifies the population / care setting studied.<br>(e.g. <i>The effectiveness of telephone support for adolescents with insulin dependant diabetes: controlled before and after study: the structure is optional for discussion papers, editorials and commentaries</i> )                                               | Page1       |
| Abstract                                                                               | A structured abstract appropriate to the design (see <i>guidelines for authors</i> ). Reports of controlled trials should follow the CONSORT format (does not apply to editorials or commentaries, Abstracts for discussion papers need not be structured)                                                                                                                                        | Page1       |
| Key words                                                                              | Between four and ten key words have been provided in alphabetical order, which accurately identify the paper's subject, purpose, method and focus. Use the Medical Subject Headings (MeSH®) thesaurus or Cumulative Index to Nursing and Allied Health (CINAHL) headings where possible (see <a href="http://www.nlm.nih.gov/mesh/meshhome.html">http://www.nlm.nih.gov/mesh/meshhome.html</a> ). | Page2       |
| Highlights                                                                             | Bullet points have been included that identify existing research knowledge relating to the specific research question / topic (what is already known) and a summary of the new knowledge added by this study (what the paper adds) (see <i>Guide for Authors</i> , does not apply to editorials or commentaries)                                                                                  | Page2       |
| References                                                                             | Citations accord to the journal's format (Author, date) and reference list includes full details of all cited references in the proper format and alphabetical order (see <i>Guide for Authors</i> )                                                                                                                                                                                              | Page12-17   |
| Other Published accounts                                                               | <i>All published and in press accounts of the study from which data in this paper originate are referred to in the paper and the relationship between this and other publications from the same study is made clear (see Guide for Authors)</i>                                                                                                                                                   |             |
|                                                                                        | The study is referred to by a distinctive name which will be used in any future publications to identify that it as the same study.                                                                                                                                                                                                                                                               |             |
|                                                                                        | Please upload copies of all previous, current and under review publications from this study and / or give full details below                                                                                                                                                                                                                                                                      |             |
| Authorship                                                                             | All authors and contributors sufficiently acknowledged as per Guide for Authors.                                                                                                                                                                                                                                                                                                                  | Page11      |



| <b>PART 2<br/>Standards of<br/>reporting</b>                   | <p>The editors require that manuscripts adhere to recognized reporting guidelines relevant to the research design used. These identify matters that should be addressed in your paper. Please indicate which guidelines you have referred to.</p> <p>These are not quality assessment frameworks and your study need not meet all the criteria implied in the reporting guideline to be worthy of publication in the IJNS. The checklists do identify essential matters that should be considered and reported upon. For example, a controlled trial may or may not be blinded but it is important that the paper identifies whether or not participants, clinicians and outcome assessors were aware of treatment assignments.</p> <p><b>**You are encouraged (although not required) to submit a checklist from the appropriate reporting guideline together with your paper as a guide to the editors and reviewers of your paper.</b></p> <p><i>Reporting guidelines endorsed by the IJNS are listed below:</i></p> | <b>Guideline referred to</b> | <b>Checklist submitted**</b> |
|----------------------------------------------------------------|-------------------------------------------------------------------------------------------------------------------------------------------------------------------------------------------------------------------------------------------------------------------------------------------------------------------------------------------------------------------------------------------------------------------------------------------------------------------------------------------------------------------------------------------------------------------------------------------------------------------------------------------------------------------------------------------------------------------------------------------------------------------------------------------------------------------------------------------------------------------------------------------------------------------------------------------------------------------------------------------------------------------------|------------------------------|------------------------------|
| Observational cohort, case control and cross sectional studies | <b>STROBE Strengthening the Reporting of Observational Studies in Epidemiology</b><br><a href="http://www.equator-network.org/index.aspx?o=1032">http://www.equator-network.org/index.aspx?o=1032</a>                                                                                                                                                                                                                                                                                                                                                                                                                                                                                                                                                                                                                                                                                                                                                                                                                   | ✓                            |                              |
| Quasi experimental / non-randomized evaluations                | <b>TREND - Transparent Reporting of Evaluations with Non-randomized Designs</b><br><a href="http://www.equator-network.org/index.aspx?o=1032">http://www.equator-network.org/index.aspx?o=1032</a>                                                                                                                                                                                                                                                                                                                                                                                                                                                                                                                                                                                                                                                                                                                                                                                                                      |                              |                              |
| Randomised (and quasi-randomised) controlled trial             | <b>CONSORT – Consolidated Standards of Reporting Trials</b><br><a href="http://www.equator-network.org/index.aspx?o=1032">http://www.equator-network.org/index.aspx?o=1032</a>                                                                                                                                                                                                                                                                                                                                                                                                                                                                                                                                                                                                                                                                                                                                                                                                                                          |                              |                              |
| Study of Diagnostic accuracy / assessment scale                | <b>STARD Standards for the Reporting of Diagnostic Accuracy studies</b><br><a href="http://www.equator-network.org/index.aspx?o=1032">http://www.equator-network.org/index.aspx?o=1032</a>                                                                                                                                                                                                                                                                                                                                                                                                                                                                                                                                                                                                                                                                                                                                                                                                                              |                              |                              |
| Systematic Review of Controlled Trials                         | <b>PRISMA - Preferred Reporting Items for Systematic Reviews and Meta-Analyses</b><br><a href="http://www.equator-network.org/index.aspx?o=1032">http://www.equator-network.org/index.aspx?o=1032</a>                                                                                                                                                                                                                                                                                                                                                                                                                                                                                                                                                                                                                                                                                                                                                                                                                   |                              |                              |
| Systematic Review of Observational Studies                     | <b>MOOSE Meta-analysis of Observational Studies in Epidemiology</b><br><a href="http://www.equator-network.org/index.aspx?o=1032">http://www.equator-network.org/index.aspx?o=1032</a>                                                                                                                                                                                                                                                                                                                                                                                                                                                                                                                                                                                                                                                                                                                                                                                                                                  |                              |                              |
|                                                                | <i>Qualitative researchers might wish to consult the guideline listed below</i>                                                                                                                                                                                                                                                                                                                                                                                                                                                                                                                                                                                                                                                                                                                                                                                                                                                                                                                                         |                              |                              |
| Qualitative studies                                            | <b>COREQ: Consolidated criteria for reporting qualitative research</b> Tong, A., Sainsbury, P., Craig, J., 2007. Consolidated criteria for reporting qualitative research (COREQ): a 32-item checklist for interviews and focus groups. <i>International Journal for Quality in Health Care</i> 19 (6), 349-357. ( <a href="http://dx.doi.org/10.1093/intqhc/mzm042">http://dx.doi.org/10.1093/intqhc/mzm042</a> )                                                                                                                                                                                                                                                                                                                                                                                                                                                                                                                                                                                                      |                              |                              |
| Other (please give source)                                     |                                                                                                                                                                                                                                                                                                                                                                                                                                                                                                                                                                                                                                                                                                                                                                                                                                                                                                                                                                                                                         |                              |                              |
| Not applicable (please elaborate)                              |                                                                                                                                                                                                                                                                                                                                                                                                                                                                                                                                                                                                                                                                                                                                                                                                                                                                                                                                                                                                                         |                              |                              |

|               |                                                                                                                                                                                                                                                                                                                                                                                                                                                                                                                                                  |  |
|---------------|--------------------------------------------------------------------------------------------------------------------------------------------------------------------------------------------------------------------------------------------------------------------------------------------------------------------------------------------------------------------------------------------------------------------------------------------------------------------------------------------------------------------------------------------------|--|
| <b>PART 3</b> | <b>Part 3 Self-assessment checklist for research and reviews (optional)</b><br><br>You might like to review the content of your paper before submission to ensure that the essential elements are present. We do not intend that this checklist should dictate sub headings that you must use (although you might find it useful) but rather give a guide to content and issues that should (in general) always be considered. You might find it helpful to note the page number where some of the key issues are dealt with to assist reviewers |  |
|---------------|--------------------------------------------------------------------------------------------------------------------------------------------------------------------------------------------------------------------------------------------------------------------------------------------------------------------------------------------------------------------------------------------------------------------------------------------------------------------------------------------------------------------------------------------------|--|

| <b>Section</b>                          | <b>Descriptor</b>                                                                                                                                                                                                                                                                            | <b>TICK</b> |
|-----------------------------------------|----------------------------------------------------------------------------------------------------------------------------------------------------------------------------------------------------------------------------------------------------------------------------------------------|-------------|
| <b>a) Primary research only</b>         |                                                                                                                                                                                                                                                                                              |             |
| Background                              | A statement of the problem / phenomena of interest, a brief summary of existing research which addresses the topic and an explanation of the purpose of the current study / review in relation to this.                                                                                      | Page2       |
| <b>METHODS</b>                          | Clear statement of the aims, objectives (hypothesis) and research design                                                                                                                                                                                                                     | Page4       |
| Settings                                | The settings and locations where the study took place                                                                                                                                                                                                                                        | Page4       |
| Inclusion Criteria                      | Eligibility criteria for participants – inclusion and exclusion criteria                                                                                                                                                                                                                     | Page5       |
| Sampling                                | Method of sampling and if relevant allocation to groups (e.g. convenience, random) and <i>description</i> of sampling, recruitment and allocation procedures .                                                                                                                               | Page4       |
| Sample size                             | How sample size was determined.                                                                                                                                                                                                                                                              | Page5       |
| Outcomes and data collection procedures | Clearly defined primary and secondary outcome measures (when applicable), Setting and methods of data collection and methods used to enhance the quality of data collection (e.g., multiple observations, training of assessors).                                                            | Page5       |
| Analysis Methods                        | Statistical methods used / approaches to qualitative analysis including procedures to ensure accuracy / validity / truthfulness of accounts.                                                                                                                                                 | Page6       |
| Ethical review*                         | Details of ethical scrutiny / approvals obtained.                                                                                                                                                                                                                                            | Page12      |
| <b>RESULTS</b><br>Participant flow      | Flow of participants through each stage of selection, allocation, follow up / inclusion in analysis (a diagram is strongly recommended). Describe protocol deviations from study as planned, together with reasons.                                                                          | N/A         |
| Recruitment                             | Dates defining the periods of recruitment and follow-up.                                                                                                                                                                                                                                     | N/A         |
| Baseline data                           | Baseline demographic and clinical characteristics of each group.                                                                                                                                                                                                                             | N/A         |
| Results                                 | Point estimates, exact p-values and confidence intervals for quantitative studies. Qualitative analyses are supported by appropriate quotations which support the derived themes / categories and which are anonymously attributed to participants (using pseudonyms, numbers or equivalent) | Page6       |
| <b>DISCUSSION</b>                       | Brief recapitulation / summary of the results taking into account study hypotheses / aims                                                                                                                                                                                                    | Page8       |
| Interpretation                          | Interpretation of the results, taking into account study limitations                                                                                                                                                                                                                         | Page10      |
| Overall evidence                        | Assessment of the current state of knowledge in the context of study results and other evidence.                                                                                                                                                                                             | Page10      |
| Implications                            | Consideration of the implications of the current state of knowledge for further research and or practice                                                                                                                                                                                     | Page11      |

# BMJ Open

## Compassion fatigue, burnout, compassion satisfaction and depression among emergency department physicians and nurses: a cross-sectional study

|                                 |                                                                                                                                                                                                                                                                                                                                         |
|---------------------------------|-----------------------------------------------------------------------------------------------------------------------------------------------------------------------------------------------------------------------------------------------------------------------------------------------------------------------------------------|
| Journal:                        | <i>BMJ Open</i>                                                                                                                                                                                                                                                                                                                         |
| Manuscript ID                   | bmjopen-2021-055941.R1                                                                                                                                                                                                                                                                                                                  |
| Article Type:                   | Original research                                                                                                                                                                                                                                                                                                                       |
| Date Submitted by the Author:   | 08-Feb-2022                                                                                                                                                                                                                                                                                                                             |
| Complete List of Authors:       | Ma, Huan; Sichuan Vocational College of Health and Rehabilitation, nursing department<br>Huang, Shuang; The people's hospital of Neijiang Dongxing District, Emergency Department<br>We, Bo; The people's hospital of Neijiang Dongxing District, Emergency Department<br>Zhong, Ying; Central South University, Xiangya Nursing School |
| <b>Primary Subject Heading</b>: | Mental health                                                                                                                                                                                                                                                                                                                           |
| Secondary Subject Heading:      | Mental health, Emergency medicine, Public health                                                                                                                                                                                                                                                                                        |
| Keywords:                       | Adult psychiatry < PSYCHIATRY, PUBLIC HEALTH, MENTAL HEALTH, Depression & mood disorders < PSYCHIATRY                                                                                                                                                                                                                                   |
|                                 |                                                                                                                                                                                                                                                                                                                                         |

SCHOLARONE™  
Manuscripts

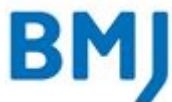

I, the Submitting Author has the right to grant and does grant on behalf of all authors of the Work (as defined in the below author licence), an exclusive licence and/or a non-exclusive licence for contributions from authors who are: i) UK Crown employees; ii) where BMJ has agreed a CC-BY licence shall apply, and/or iii) in accordance with the terms applicable for US Federal Government officers or employees acting as part of their official duties; on a worldwide, perpetual, irrevocable, royalty-free basis to BMJ Publishing Group Ltd ("BMJ") its licensees and where the relevant Journal is co-owned by BMJ to the co-owners of the Journal, to publish the Work in this journal and any other BMJ products and to exploit all rights, as set out in our [licence](#).

The Submitting Author accepts and understands that any supply made under these terms is made by BMJ to the Submitting Author unless you are acting as an employee on behalf of your employer or a postgraduate student of an affiliated institution which is paying any applicable article publishing charge ("APC") for Open Access articles. Where the Submitting Author wishes to make the Work available on an Open Access basis (and intends to pay the relevant APC), the terms of reuse of such Open Access shall be governed by a Creative Commons licence – details of these licences and which [Creative Commons](#) licence will apply to this Work are set out in our licence referred to above.

Other than as permitted in any relevant BMJ Author's Self Archiving Policies, I confirm this Work has not been accepted for publication elsewhere, is not being considered for publication elsewhere and does not duplicate material already published. I confirm all authors consent to publication of this Work and authorise the granting of this licence.

# Compassion fatigue, burnout, compassion satisfaction and depression among emergency department physicians and nurses: a cross-sectional study

Huan Ma<sup>1</sup>, Shuang-quan Huang<sup>2</sup>, Bo We<sup>2</sup>, Ying Zhong<sup>3</sup>

<sup>1</sup>Sichuan Vocational College of Health and Rehabilitation, Zigong, Sichuan, China

<sup>2</sup>Emergency Department, The people's hospital of Neijiang Dongxing District, Neijiang, Sichuan, China

<sup>3</sup>Xiangya Nursing School, Central South University, Changsha, Hunan, China

**Corresponding author:**

Correspondence should be addressed to: Bo We, Emergency Department, The people's hospital of Neijiang Dongxing District, Neijiang, Sichuan, China. email: cswzy2017@163.com

## Abstract

**Objectives:** Emergency department physicians and nurses are at high risk of compassion fatigue, burnout and depression. The purpose of this study was to examine the interrelationship between compassion fatigue, burnout, compassion satisfaction and depression in emergency department physicians and nurses.

**Design:** A cross-sectional study.

**Setting:** This study was conducted in five tertiary hospitals in five different cities across the province of Sichuan, China, in 2021.

**Participants:** A total of 342 emergency department physicians and nurses participated in the study.

**Main outcome measures:** Compassion fatigue, burnout, compassion satisfaction and depression scores.

**Results:** Among the study participants, 100% were found to have depressive

1  
2  
3  
4 symptoms, 27.8% had low compassion satisfaction, 2.3% had high burnout and 3.8%  
5  
6 had compassion fatigue. In the final multiple linear regression model, marital status  
7  
8 ( $p=0.008$ ; 95% confidence interval [CI],  $-5.205$  to  $-0.789$ ), history of chronic disease  
9  
10 ( $p=0.003$ ; 95% CI,  $-6.461$  to  $-1.386$ ), compassion satisfaction ( $p<0.001$ ; 95% CI,  
11  
12  $0.593$  to  $1.274$ ), burnout ( $p=0.019$ ; 95% CI,  $0.084$  to  $0.930$ ) and compassion fatigue  
13  
14 ( $p<0.001$ ; 95% CI,  $-1.527$  to  $-1.053$ ) among emergency department physicians and  
15  
16 nurses were considered to be significant predictors of depression.  
17  
18  
19  
20  
21

22 **Conclusions:** The prevalence of depression among emergency department physicians  
23  
24 and nurses is high in the province of Sichuan, China. Compassion fatigue, burnout  
25  
26 and compassion satisfaction were significantly associated with depression in  
27  
28 emergency department physicians and nurses. Hospital administrations should  
29  
30 consider these findings to develop appropriate psychological interventions and  
31  
32 strategies, to prevent, alleviate or treat severe depression among emergency  
33  
34 department physicians and nurses in the province of Sichuan.  
35  
36  
37  
38  
39

40 **Keywords:** Compassion fatigue, burnout, compassion satisfaction, depression,  
41  
42 emergency department  
43  
44

### 45 **Strengths and limitations of this study**

46  
47  
48 •This is a novel study conducted in the province of Sichuan, China, which describes  
49  
50 the prevalence of compassion fatigue, burnout, compassion satisfaction and  
51  
52 depression and the influencing factors associated with depression among emergency  
53  
54 department physicians and nurses.  
55  
56

57  
58 •The causal association between compassion fatigue, burnout, compassion satisfaction  
59  
60

1  
2  
3  
4 and depression could not be established since this was a cross-sectional study.  
5

6 •Data on compassion fatigue, burnout, compassion satisfaction and depression were  
7  
8 collected based on the participants' self-reports, which may have led to information  
9  
10 bias.  
11  
12

### 13 14 **Introduction**

15  
16 Emergency departments are fast-paced, high-pressure environments in which the  
17  
18 medical staff encounter heavy workloads, violence, interpersonal conflict, high  
19  
20 patient load, mass casualty incidents; moreover, limited resources and poor skill mix  
21  
22 compound the problem.<sup>1 2</sup> Emergency department physicians and nurses who are at  
23  
24 the frontline of a demanding health care system take significant responsibility for the  
25  
26 care of emergency patients, regardless of overstretched and overburdened resources.<sup>3</sup>  
27  
28 Emergency physicians and nurses who witness alarming morbidity and mortality on a  
29  
30 daily basis, can experience adverse physical and mental health problems, such as  
31  
32 compassion fatigue, depression and burnout.<sup>4</sup> It has been reported that compassion  
33  
34 fatigue, burnout and depression afflicting emergency physicians and nurses can not  
35  
36 only harm individual mental health, but can also cause a series of fateful  
37  
38 consequences, including medical errors, poor-quality patient care and increased  
39  
40 patient mortality during hospital stay.<sup>5-7</sup>  
41  
42  
43  
44  
45  
46  
47  
48  
49

50  
51 Compassion fatigue, which is considered as an occupational hazard in healthcare,  
52  
53 is conceptualized as “the natural, consequent behaviors and emotions resulting from  
54  
55 knowing about a traumatizing event experienced by a significant other – the stress  
56  
57 resulting from helping or wanting to help a traumatized or suffering person”.<sup>8 9</sup>  
58  
59  
60

1  
2  
3  
4 Compassion fatigue can result in a series of physical, mental and work-related  
5  
6 symptoms that seriously affect quality of patient care and staff-patient relationships.<sup>10</sup>  
7  
8  
9 Chu reported that compassion fatigue has a significant adverse effect on job  
10  
11 performance and organizational citizenship behavior.<sup>11</sup> A study conducted in the U.S.  
12  
13 indicated that about 80% of emergency nurses had moderate to high levels of  
14  
15 compassion fatigue.<sup>12</sup> Barnett et al. noted that compassion fatigue was positively  
16  
17 associated with emotional display.<sup>13</sup> Burnout is a work-related syndrome and  
18  
19 predominantly defined as “high emotional exhaustion, depersonalization and a low  
20  
21 level of personal accomplishment”.<sup>14</sup> The prevalence of burnout among emergency  
22  
23 medical staff was very high and burnout can cause serious consequences.<sup>15-17</sup>  
24  
25 Moukarzel et al. noted that 34.6% emergency medical staff had severe burnout and  
26  
27 Soltanifar et al. found that 84.5% emergency physicians had experienced high  
28  
29 emotional exhaustion.<sup>15 18</sup> Jyothindran’s findings indicated that severe burnout was  
30  
31 highly correlated with medical error and turnover.<sup>19</sup> Compassion satisfaction is  
32  
33 defined as the emotions generated and the sense of achievement derived from helping  
34  
35 and caring for patients, whether related to direct assistance or support in improvement  
36  
37 of patients’ condition.<sup>20</sup>

38  
39  
40  
41  
42  
43  
44  
45  
46  
47  
48 Depression, a common and serious mental illness, is listed by the World Health  
49  
50 Organization (WHO) as one of the most important factors contributing to global  
51  
52 disability and the main contributor to suicide deaths at all ages.<sup>21</sup> The most common  
53  
54 symptoms associated with depression are persistent sadness, a loss of interest and  
55  
56 energy, insomnia, headache, unexplained pain, gastrointestinal symptoms,  
57  
58  
59  
60



1  
2  
3  
4 hopelessness and thoughts of self-harm or suicide.<sup>22</sup> Severe depression can lead to  
5  
6 many negative outcomes. For example, a recent study on emergency department  
7  
8 nurses during the COVID-19 pandemic in China showed that depression had an  
9  
10 adverse effect on quality of patient care and nurses' quality of life.<sup>23</sup> Vasconcelos et al.  
11  
12 found that depressive symptoms were significantly associated with burnout.<sup>24</sup>  
13  
14  
15  
16  
17 Emergency medical staff are exposed to all kinds of stress every day.<sup>25</sup> Hence, special  
18  
19 attention should be paid to the psychological status of emergency physicians and  
20  
21  
22  
23  
24  
25  
26  
27  
28  
29  
30  
31  
32  
33  
34  
35  
36  
37  
38  
39  
40  
41  
42  
43  
44  
45  
46  
47  
48  
49  
50  
51  
52  
53  
54  
55  
56  
57  
58  
59  
60

Although extensive studies on depression have been conducted, most of the  
studies have only focused on nurses.<sup>23 24</sup> Moreover, few studies have been carried out  
to explore the factors that influence the development of depression in emergency  
physicians and nurses.<sup>5 25</sup> Considering that emergency physicians and nurses have  
emotionally demanding tasks and work in high-pressure situations, the aim of this  
study was to determine the prevalence of compassion fatigue, burnout, compassion  
satisfaction and depression and explore the interrelationship of these among this  
highly vulnerable population.

## Methods

### Study design and participants

A cross-sectional survey was conducted among emergency physicians and nurses  
across five different cities of Sichuan province, China. A convenience sample was  
used to recruit physicians and registered nurses working in the emergency department.

The eligibility criteria were as follows: (1) being licensed physicians and registered

1  
2  
3  
4 nurses; (2) with more than one year's work experience; (3) working in emergency  
5  
6 department; (4) provided consent to participate. The data were collected by five  
7  
8 trained research assistants from January to February 2021. A set of questionnaires was  
9  
10 distributed to all emergency medical staff by the five tertiary hospitals' administration.  
11  
12 All the participants were informed that their participation was voluntary and that their  
13  
14 data would be anonymised. A total of 350 emergency physicians and nurses filled in  
15  
16 the questionnaires, out of which 342 questionnaires were returned (an effective  
17  
18 response rate of 97.7%).  
19  
20  
21  
22  
23

### 24 25 **Measurements**

26  
27 The questionnaire comprised three instruments: a demographic survey, the  
28  
29 Professional Quality of Life (ProQOLv5) scale and the Center for Epidemiologic  
30  
31 Studies Depression (CES-D) scale. Sociodemographic data were collected with a  
32  
33 self-designed questionnaire, including position (physician, nurse), age (less than 35  
34  
35 years, 35 years or older), gender (male, female), marital status (married, unmarried),  
36  
37 education level (diploma, associate degree, bachelor's degree, master's degree or  
38  
39 higher), professional title (primary, intermediate, senior), work experience (less than 5  
40  
41 years, 5–10 years, over 10 years), weekly night shifts (none, 1–2, 3–4, more than 4),  
42  
43 daily work hours (less than 9 h, 9–12 h, over 12 h), cigarette use (yes, no), alcohol use  
44  
45 (yes, no) and history of chronic disease (yes, no).  
46  
47  
48  
49  
50  
51

### 52 53 **Professional quality of life scale**

54  
55 Compassion fatigue, burnout and compassion satisfaction levels were assessed using  
56  
57 the ProQOLv5. The questionnaire includes 30 items with a Likert scale of 5 points  
58  
59  
60

1  
2  
3  
4 (1=never; 5=always), 10 items for compassion satisfaction, 10 items for burnout and  
5  
6 10 items for compassion fatigue.<sup>20</sup> The level of compassion satisfaction was divided  
7  
8 into less than 22 (low), 23–41 (middle) and more than 42 (high). For compassion  
9  
10 fatigue and burnout, a score of 22 or less represents low levels, 23–41 represents  
11  
12 middle levels, and a score of more than 42 high levels. The alpha reliability  
13  
14 coefficients for compassion satisfaction, burnout and compassion fatigue were 0.775,  
15  
16 0.775 and 0.807, respectively.  
17  
18  
19  
20  
21

## 22 **Depression**

23  
24 The CES-D is a 20-item questionnaire intended to measure the frequency of  
25  
26 occurrence of symptoms of depression over the past week using a 5-point Likert scale  
27  
28 (each item was scored as follows: 0=rarely or none of the time to 3=most or all of the  
29  
30 time; total score range, 0–60).<sup>26</sup> The CES-D scale has four reverse-scored items (items  
31  
32 4, 8, 12 and 16) and covers four major symptoms of depression, including (1)  
33  
34 depressed affect (e.g. sadness, crying); (2) absence of positive affect (e.g. hope,  
35  
36 enjoyment); (3) somatic symptoms (e.g., appetite problems, problems “getting  
37  
38 going”); and (4) interpersonal relations (e.g. perceiving others as unfriendly).  
39  
40 Standard cut-off value  $\geq 16$  indicates the likely presence of depression. The  
41  
42 Cronbach’s  $\alpha$  in the current study was 0.916.  
43  
44  
45  
46  
47  
48  
49

## 50 **Statistical analysis**

51  
52 Statistical analysis was conducted using SPSS version 22.0 (SPSS Inc., Chicago, IL,  
53  
54 USA). Continuous variables were summarized as mean with standard deviation (SD),  
55  
56 while categorical variables were presented as frequencies and percentages.  
57  
58  
59  
60

1  
2  
3  
4 Independent samples t-test, and one-way analysis of variance (ANOVA) were used to  
5  
6 compare participants' depression by demographic characteristics. Associations  
7  
8 between compassion satisfaction, burnout, compassion fatigue and depression among  
9  
10 emergency physicians and nurses were analysed using Pearson's correlation analysis.  
11  
12 A multiple linear regression model was used to estimate the effect of compassion  
13  
14 satisfaction, burnout, compassion fatigue and other demographic variables on  
15  
16 depression. A *p* value of less than 0.05 was considered statistically significant  
17  
18 (two-tailed).  
19  
20  
21  
22  
23

### 24 **Patient and public involvement**

25  
26 Patients or members of the public were not involved in the design, reporting or  
27  
28 dissemination plans of our research.  
29  
30  
31  
32

### 33 **Results**

34  
35 The participants' baseline characteristics are shown in Table 1. The mean age was  
36  
37 32.59 years (SD, 8.19; age range, 20–58 years). Most participants were female  
38  
39 (70.5%), nurses (71.1%), married (68.7.0%), held a bachelor degree (62.9%) and had  
40  
41 a primary professional title (57.0%).  
42  
43  
44  
45

46  
47 The differences in depression scores according to the characteristics of  
48  
49 emergency physicians and nurses are also presented in Table 1. There were significant  
50  
51 differences in depression scores based on marital status ( $p<0.01$ ), professional title  
52  
53 ( $p<0.05$ ), daily work hours ( $p<0.05$ ), alcohol use ( $p<0.05$ ) and history of chronic  
54  
55 disease ( $p<0.01$ ).  
56  
57  
58

### 59 **Table 1. Demographic characteristics of emergency department physicians and**

**nurses (N=342).**

| Variables                  | N (%)      | Depression<br>Mean (SD) |
|----------------------------|------------|-------------------------|
| Position                   |            | <i>P</i> =0.181         |
| Physician                  | 99 (28.9)  | 38.60 (11.76)           |
| Nurse                      | 243 (71.1) | 36.86 (10.52)           |
| Age (years)                |            | <i>P</i> =0.991         |
| <35                        | 236 (69.0) | 37.37 (10.23)           |
| ≥35                        | 106 (31.0) | 37.35 (12.32)           |
| Gender                     |            | <i>P</i> =0.162         |
| Male                       | 101 (29.5) | 38.64 (12.22)           |
| Female                     | 241 (70.5) | 36.83 (10.28)           |
| Marital status             |            | <i>P</i> =0.002         |
| Unmarried                  | 107 (31.3) | 40.01(11.05)            |
| Married                    | 235 (68.7) | 36.16(10.64)            |
| Education level            |            | <i>P</i> =0.071         |
| Associate degree           | 102 (29.8) | 36.16 (9.97)            |
| Bachelor degree            | 215 (62.9) | 38.33 (11.49)           |
| Master degree              | 25 (7.3)   | 34.00 (8.24)            |
| Profession title           |            | <i>P</i> =0.034         |
| Primary                    | 195 (57.0) | 37.57 (10.56)           |
| Intermediate               | 108 (31.6) | 38.48 (11.51)           |
| Senior                     | 39 (11.4)  | 33.25 (10.18)           |
| Work experience (years)    |            | <i>P</i> =0.810         |
| <5                         | 94 (27.5)  | 37.48 (10.09)           |
| 5-10                       | 95 (27.8)  | 37.88 (10.96)           |
| >10                        | 153 (44.7) | 36.97 (11.39)           |
| Weekly night shifts        |            | <i>P</i> =0.063         |
| 0                          | 46 (13.5)  | 33.60 (9.35)            |
| 1-2                        | 148 (43.4) | 37.89 (11.19)           |
| 3-4                        | 106 (31.0) | 37.46 (11.10)           |
| >4                         | 42 (12.3)  | 39.40 (10.35)           |
| Daily work hours(h)        |            | <i>P</i> =0.017         |
| <9                         | 161 (47.1) | 35.60 (10.29)           |
| 9-12                       | 118 (34.5) | 39.19 (11.13)           |
| >12                        | 163 (48.4) | 38.44 (11.45)           |
| Cigarette use              |            | <i>P</i> =0.244         |
| Yes                        | 38 (11.1)  | 39.31 (12.13)           |
| No                         | 304 (88.9) | 37.12 (10.74)           |
| Alcohol use                |            | <i>P</i> =0.019         |
| Yes                        | 50 (14.6)  | 40.70 (10.91)           |
| No                         | 292 (85.4) | 36.79 (10.82)           |
| History of chronic disease |            | <i>P</i> =0.001         |
| Yes                        | 58 (17.0)  | 41.79 (12.21)           |

|    |            |               |
|----|------------|---------------|
| No | 284 (83.0) | 36.46 (10.41) |
|----|------------|---------------|

As depicted in Table 2, compassion satisfaction levels were moderate in approximately 70.8% of emergency physicians and nurses, low in 27.8% of them and high in 1.4%. Of the participants, 2.3% had a high burnout score, 66 (19.3%) had a low burnout score and 3% of the respondents had a high compassion fatigue score. The mean scores for depression, compassion satisfaction, burnout and compassion fatigue were 37.36 (SD, 10.91), 26.70 (SD, 6.36), 27.74 (SD, 6.19) and 30.19 (SD, 6.59), respectively.

**Table 2. Compassion satisfaction, burnout, compassion fatigue and depression levels among emergency physicians and nurses (N=342).**

| Dimensions              | N (%)      | Mean  | SD    |
|-------------------------|------------|-------|-------|
| Depression              |            | 37.36 | 10.91 |
| Compassion satisfaction |            | 26.70 | 6.36  |
| Low                     | 95 (27.8)  | -     | -     |
| Medium                  | 242 (70.8) | -     | -     |
| High                    | 5 (1.4)    | -     | -     |
| Burnout                 |            | 27.74 | 6.19  |
| Low                     | 66 (19.3)  | -     | -     |
| Medium                  | 268 (78.4) | -     | -     |
| High                    | 8 (2.3)    | -     | -     |
| Compassion fatigue      |            | 30.19 | 6.59  |
| Low                     | 43 (12.6)  | -     | -     |
| Medium                  | 286 (83.6) | -     | -     |
| High                    | 13 (3.8)   | -     | -     |

Both compassion satisfaction and burnout were significantly correlated with three depression metrics: depressed affect, somatic symptoms and inter-personal relations. Apart from positive affect, there was no relationship between the other sub-scales of depression and compassion fatigue (Table 3).

**Table 3. Correlation between dimensions of compassion satisfaction, burnout, compassion fatigue and depression (N=342).**

|  | Depression | Depressed Affect | Somatic | Positive Affect | Inter-personal |
|--|------------|------------------|---------|-----------------|----------------|
|--|------------|------------------|---------|-----------------|----------------|

|                         |          |         |         |          |         |
|-------------------------|----------|---------|---------|----------|---------|
| Compassion satisfaction | 0.282**  | 0.319** | 0.317** | 0.003    | 0.311** |
| Burnout                 | 0.171**  | 0.214** | 0.239** | -0.163** | 0.247** |
| Compassion fatigue      | -0.178** | -0.092  | -0.021  | -0.430** | 0.001   |

Note:\*\* $p < 0.01$

Depression was computed as outcome variable, and the independent variables comprised the demographic characteristics and the three dimensions of compassion fatigue. Table 4 shows that marital status, history of chronic disease, compassion satisfaction, burnout and compassion fatigue collectively accounted for 39.6% of the variance in depression ( $F = 28.952$ ,  $p < 0.001$ ,  $R^2 = 0.410$ , adjusted  $R^2 = 0.396$ ).

**Table 4. Multiple linear regression analysis of depression (N=342).**

| Dependent variables | Independent variables      | Unstandardised coefficient |       | Standardised coefficient | <i>t</i> | <i>P</i> | 95% CI      |             |
|---------------------|----------------------------|----------------------------|-------|--------------------------|----------|----------|-------------|-------------|
|                     |                            | B                          | SE    | Beta                     |          |          | Lower bound | Upper bound |
| Depression          | Marital status             | -2.997                     | 1.123 | -0.128                   | -2.670   | 0.008    | -5.205      | -0.789      |
|                     | History of chronic disease | -3.924                     | 1.290 | -0.135                   | -3.052   | 0.003    | -6.461      | -1.386      |
|                     | Compassion satisfaction    | 0.934                      | 0.173 | 0.545                    | 5.388    | <0.001   | 0.593       | 1.274       |
|                     | Burnout                    | 0.507                      | 0.215 | 0.288                    | 2.359    | 0.019    | 0.084       | 0.930       |
|                     | Compassion fatigue         | -1.290                     | 0.120 | -0.779                   | -10.707  | <0.001   | -1.527      | -1.053      |

## Discussion

The findings of the current study regarding the frequency and distribution of depression among emergency physicians and nurses show that the following characteristics were significantly associated with higher levels of depression—marital status: unmarried; intermediate professional title; consumption of alcohol; daily

1  
2  
3  
4 worktime between 9 and 12 h; and a history of chronic disease. Similar to our study, a  
5  
6 statistically significant difference was observed in the levels of depression among  
7  
8  
9 frontline doctors combating the COVID-19 pandemic in India with regard to marital  
10  
11 status.<sup>27</sup> One reason for this could be that spousal support is beneficial for maintaining  
12  
13 good mental health.<sup>28</sup> Our findings concur with those of Xiao et al. who found that  
14  
15 depression levels were different among different professional titles and that an  
16  
17 intermediate title was an independent influencing factor.<sup>29</sup> This could be explained by  
18  
19 the fact that compared to medical staff with an intermediate title, physicians and  
20  
21 nurses with a senior title have a richer work experience, a higher income and a lower  
22  
23 family burden.<sup>30</sup> The findings of this study are in accordance with those of two  
24  
25 previous studies that reported that working excessively long hours on a daily basis  
26  
27 was significantly associated with the frequency of depressive symptoms.<sup>31 32</sup>  
28  
29  
30 Emergency physicians and nurses endure a heavy burden of work imposed on them  
31  
32 on a daily basis and most often without a day of safety rest. Work overload and  
33  
34 chronic sleep deprivation can increase the risk for depression.<sup>33</sup> A study conducted by  
35  
36 Sørensen et al. among 1,943 Danish physicians noted that the emergency department  
37  
38 had the highest proportion of risky alcohol use.<sup>34</sup> Besides, the study of Silva et al.  
39  
40 reported that the prevalence of depressive symptoms among emergency nurses in  
41  
42 Brazil is 95.24%.<sup>35</sup> Emergency physicians and nurses who had severe depressive  
43  
44 symptoms were more likely to be drinking alcohol to regulate these emotional  
45  
46 states.<sup>36</sup> Our results are also similar to those reported in a study by Ngasa et al. that  
47  
48 found that the presence of a chronic disease was independently associated with  
49  
50  
51  
52  
53  
54  
55  
56  
57  
58  
59  
60



1  
2  
3  
4 depression.<sup>37</sup>  
5  
6  
7

8 Our study found a considerably high prevalence of depressive symptoms among  
9  
10 emergency physicians and nurses, and the prevalence of depressive symptoms  
11  
12 reached up to 100%, which is much higher than the previous study.<sup>38</sup> The high level of  
13  
14 depression may be associated with factors, such as excessive workload, overcrowding  
15  
16 and resource shortages in the emergency department.<sup>39 40</sup> The COVID-19 pandemic  
17  
18 has added to the heavy workload and the life-threatening emergencies that medical  
19  
20 staff, especially physicians and nurses, were facing, thereby aggravating the  
21  
22 psychological pressure; this is one of the neglected important reasons causing the high  
23  
24 levels of depression.<sup>41</sup> The prevalence rates of burnout, compassion satisfaction and  
25  
26 compassion fatigue in our study were much lower than those in nurses in a study  
27  
28 conducted in an adult emergency and urgent care department.<sup>8</sup> However, these  
29  
30 differences may be due to the small sample size (87 nurses), which consisted of  
31  
32 emergency nurses only in the Portuguese study. However, in this study, the results  
33  
34 indicated an average to high level of compassion fatigue and burnout among  
35  
36 emergency nurses, which was much higher than that of a previous study.<sup>42</sup>  
37  
38  
39  
40  
41  
42  
43  
44  
45  
46  
47

48 We found that compassion satisfaction, burnout and compassion fatigue had a  
49  
50 statistically significant correlation with depression. The current study shows that  
51  
52 compassion satisfaction has a significant positive correlation with depression and  
53  
54 compassion fatigue has a significant negative correlation with depression, which is  
55  
56 not consistent with other recent studies. Jo et al. and Hegney et al. both found an  
57  
58  
59  
60

1  
2  
3  
4 opposite association, that is, compassion satisfaction was negatively associated with  
5  
6 depression and compassion fatigue was positively correlated with depression.<sup>43 44</sup> The  
7  
8 reason for this may include differences in measurement tools. Interestingly, an  
9  
10 association analysis showed that burnout was significantly related to depression, a  
11  
12 finding similar to that of a survey of emergency physicians.<sup>45</sup>  
13  
14  
15  
16

### 17 **Limitations of the current study**

18  
19 Our study has a few limitations. First, our study sample was drawn from a single  
20  
21 Chinese region with predominantly emergency physicians and nurses and adopted the  
22  
23 method of convenient sampling, which may have caused the uncommonly high scores  
24  
25 of depression and limits the generalisability of the findings to other professional  
26  
27 groups. Second, most of the instruments used in this research were based on the  
28  
29 respondents' self-reports, which is prone to information bias. Therefore, more robust  
30  
31 methods of assessment and better tools should be used in future studies. Third, the  
32  
33 causal association between compassion satisfaction, burnout, compassion fatigue and  
34  
35 depression is not clear, due to the cross-sectional study nature of our study. Hence, we  
36  
37 recommend that future research should examine the interaction between compassion  
38  
39 fatigue, burnout, compassion satisfaction and depression and evaluate their potential  
40  
41 impact rather than focusing on these phenomena separately. Lastly, compassion  
42  
43 fatigue, in our study, merely contributed to (did not cause) increase in depression.  
44  
45  
46  
47  
48  
49  
50  
51

### 52 **Conclusion**

53  
54 The prevalence of depression among emergency physicians and nurses in the province  
55  
56 of Sichuan was shown to be extremely high. Marital status and the presence of a  
57  
58  
59  
60

1  
2  
3  
4 chronic disease among the staff affected their depression levels. We also examined  
5  
6 the relationship between compassion satisfaction, burnout, compassion fatigue and  
7  
8 depression among emergency physicians and nurses in Sichuan province and found a  
9  
10 significant association between these. Moreover, it was also determined that  
11  
12 independent variables, such as compassion satisfaction, burnout and compassion  
13  
14 fatigue strongly predict depression levels among emergency physicians and nurses.  
15  
16 Consequently, reducing the level of burnout and compassion fatigue and increasing  
17  
18 compassion satisfaction could be a key factor in addressing depression in emergency  
19  
20 department physicians and nurses. The findings of our study have the potential to  
21  
22 provide new directions and perspectives for future research. However, further studies  
23  
24 are needed to derive more specific details through in-depth interviews with physicians  
25  
26 and nurses to more accurately evaluate the prevalence of depression among  
27  
28 emergency physicians and nurses.  
29  
30  
31  
32  
33  
34  
35  
36

### 37 **Acknowledgements**

38  
39 We would like to thank all emergency department physicians and nurses who  
40  
41 completed questionnaires for their unbiased participation; we gratefully acknowledge  
42  
43 the contributions by the hospital administrators of the five hospitals and thank them  
44  
45 for their efforts and time.  
46  
47  
48  
49

### 50 **Contributors**

51  
52 HM wrote the manuscript and conducted the statistical analysis and interpretation;  
53  
54 BW was in charge of the study concept and design; and SQH and YZ were in charge  
55  
56 of data acquisition. All authors revised and approved the final manuscript.  
57  
58  
59  
60

## **Funding**

No financial support was received to conduct this study.

## **Competing interests**

None declared.

## **Patient consent for publication**

Not required.

## **Ethics approval**

The study was approved by the Institutional Review Board of Xiangya Nursing School (Approval number E202062), Central South University, China.

## **Data availability statement**

Data are available upon reasonable request.

## **REFERENCES**

- 1 Johnston A, Abraham L, Greenslade J, et al. Review article: Staff perception of the emergency department working environment: Integrative review of the literature. *Emerg Med Australas* 2016;28(1):7-26.
- 2 Rasmus P, Marcinkowska W, Cieleban N, et al. Workload and coping with stress and the health status of emergency medical staff in the context of work-life balance. *Med Pr* 2020;71(5):587-93.
- 3 Elder EG, Johnston A, Wallis M, et al. Work-based strategies/interventions to ameliorate stressors and foster coping for clinical staff working in emergency departments: a scoping review of the literature. *Australas Emerg Care* 2020;23(3):181-92.

- 1  
2  
3  
4 4 Sawe HR, Murray B, Jamieson J. Compassion fatigue in emergency providers:  
5  
6 Experiences from Sub-Saharan Africa. *Emerg Med Australas* 2016 ;28(1):109-11.  
7  
8  
9 5 Guillén-Astete C, Penedo-Alonso R, Gallego-Rodríguez P, et al. Levels of anxiety  
10  
11 and depression among emergency physicians in Madrid during the SARS-CoV-2  
12  
13 pandemic. Niveles de ansiedad y depresión en médicos de urgencias de Madrid  
14  
15 durante la pandemia por el virus SARS-CoV-2. *Emergencias*. 2020;32(5):369-371.  
16  
17  
18 6 O'Callaghan EL, Lam L, Cant R, et al. Compassion satisfaction and compassion  
19  
20 fatigue in Australian emergency nurses: A descriptive cross-sectional study. *Int*  
21  
22 *Emerg Nurs* 2020; 48:100785.  
23  
24  
25 7 Stehman CR, Testo Z, Gershaw RS, Kellogg AR. Burnout, Drop Out, Suicide:  
26  
27 Physician Loss in Emergency Medicine, Part I. *West J Emerg Med*.  
28  
29 2019;20(3):485-494.  
30  
31  
32 8 Borges EMDN, Fonseca CINDS, Baptista PCP, et al. Compassion fatigue among  
33  
34 nurses working on an adult emergency and urgent care unit. *Rev Lat Am*  
35  
36 *Enfermagem* 2019; 27: e3175.  
37  
38  
39 9 Deering D. Compassion Fatigue: coping with secondary traumatic stress disorder in  
40  
41 those who treat the traumatized. *Journal of Psychosocial Nursing & Mental Health*  
42  
43 *Services* 1996;34(11):52.  
44  
45  
46 10 Sorenson C, Bolick B, Wright K, et al. Understanding Compassion Fatigue in  
47  
48 Healthcare Providers: A Review of Current Literature. *J Nurs Scholarsh*  
49  
50 2016;48(5):456-65.  
51  
52  
53 11 Chu LC. The Influence of Compassion Fatigue on Job Performance and  
54  
55  
56  
57  
58  
59  
60

- 1  
2  
3  
4 Organizational Citizenship Behaviors: The Moderating Effect of Person-Job Fit. *J*  
5  
6 *Nurs Scholarsh* 2021;53(4):500-10.  
7  
8  
9 12 Hooper C, Craig J, Janvrin DR, Wetsel MA, Reimels E. Compassion satisfaction,  
10  
11 burnout, and compassion fatigue among emergency nurses compared with nurses  
12  
13 in other selected inpatient specialties. *J Emerg Nurs*. 2010;36(5):420-427.  
14  
15  
16 13 Barnett MD, Hays KN, Cantu C. Compassion fatigue, emotional labor, and  
17  
18 emotional display among hospice nurses. *Death Stud* 2019; 9:1-7.  
19  
20  
21 14 Maslach C, Schaufeli WB, Leiter MP. Job burnout. *Annu Rev Psychology*.  
22  
23 2001;52:397-422.  
24  
25  
26 15 Moukarzel A, Michelet P, Durand AC, et al. Burnout Syndrome among  
27  
28 Emergency Department Staff: Prevalence and Associated Factors. *Biomed Res Int*.  
29  
30 2019;2019:6462472.  
31  
32  
33 16 Ilić IM, Arandjelović MŽ, Jovanović JM, Nešić MM. Relationships of  
34  
35 work-related psychosocial risks, stress, individual factors and burnout -  
36  
37 Questionnaire survey among emergency physicians and nurses. Relationships of  
38  
39 work-related psychosocial risks, stress, individual factors and burnout –  
40  
41 Questionnaire survey among emergency physicians and nurses. *Med Pr*.  
42  
43 2017;68(2):167-178.  
44  
45  
46 17 Civita M, Laurita E, Di Stefano C, Gervasoni M, Viotti S, Zucchi S. Physicians  
47  
48 and nurses' burnout in the emergency departments of North West of Italy. *Intern*  
49  
50 *Emerg Med*. 2021;16(5):1381-1385.  
51  
52  
53  
54  
55  
56  
57  
58 18 Soltanifar A, Pishbin E, Attaran Mashhadi N, Najaf Najafi M, Siahtir M. Burnout  
59  
60

- 1  
2  
3  
4 among female emergency medicine physicians: A nationwide study. *Emerg Med*  
5  
6 *Australas*. 2018;30(4):517-522.  
7  
8  
9 19. Jyothindran R, d'Etienne JP, Marcum K, et al. Fulfillment, burnout and resilience  
10  
11 in emergency medicine-Correlations and effects on patient and provider outcomes.  
12  
13 *PLoS One*. 2020;15(10):e0240934.  
14  
15  
16 20 Stamm B. The concise ProQOL manual. 2nd ed. Pocatello, ID: ProQOL.org. 2010.  
17  
18  
19 21 World Health Organization. Depression and other common mental disorders:  
20  
21 global health estimates, 2017. Available:  
22  
23 <https://www.who.int/publications/i/item/depression-global-health-estimates> [accessed  
24  
25 3 Jan 2017].  
26  
27  
28 22 J Priyadarshini. Depression-Let's Talk, 2017. Available:  
29  
30 [http://www.who.int/campaigns/world-health-day/2017/handouts-depression/what-y](http://www.who.int/campaigns/world-health-day/2017/handouts-depression/what-you-should-know-01.pdf?ua=1.pdf)  
31  
32 [ou-should-know-01.pdf?ua=1.pdf](http://www.who.int/campaigns/world-health-day/2017/handouts-depression/what-you-should-know-01.pdf?ua=1.pdf) [accessed 7 Apr 2017].  
33  
34  
35  
36  
37 23 An Y, Yang Y, Wang A, et al. Prevalence of depression and its impact on quality  
38  
39 of life among frontline nurses in emergency departments during the COVID-19  
40  
41 outbreak. *J Affect Disord*. 2020;276:312-315.  
42  
43  
44  
45 24 Vasconcelos EM, Martino MMF, França SPS. Burnout and depressive symptoms  
46  
47 in intensive care nurses: relationship analysis. *Rev Bras Enferm*.  
48  
49 2018;71(1):135-141.  
50  
51  
52  
53 25 Crilly J, Greenslade J, Lincoln C, et al. Measuring the impact of the working  
54  
55 environment on emergency department nurses: A cross-sectional pilot study. *Int*  
56  
57 *Emerg Nurs* 2017; 31:9-14.  
58  
59  
60

- 1  
2  
3  
4 26 Radloff LS. The CES-D scale: a self-report depression scale for research in the  
5  
6 general population. *Appl Psychol Meas* 1977; 1:385-401.  
7  
8  
9 27 Das A, Sil A, Jaiswal S, et al. A Study to Evaluate Depression and Perceived  
10  
11 Stress Among Frontline Indian Doctors Combating the COVID-19 Pandemic. *Prim*  
12  
13 *Care Companion CNS Disord.* 2020;22(5):20m02716.  
14  
15  
16  
17 28 Leong OS, Ghazali S, Hussin EOD, et al. Depression among older adults in  
18  
19 Malaysian daycare centres. *Br J Community Nurs* 2020;25(2):84-90.  
20  
21  
22 29 Xiao X, Zhu X, Fu S, et al. Psychological impact of healthcare workers in China  
23  
24 during COVID-19 pneumonia epidemic: A multi-center cross-sectional survey  
25  
26 investigation. *J Affect Disord* 2020; 274:405-410.  
27  
28  
29  
30 30 Wang Y, Wang P. Perceived stress and psychological distress among chinese  
31  
32 physicians: The mediating role of coping style. *Medicine (Baltimore)* 2019;98(23):  
33  
34 e15950.  
35  
36  
37  
38 31 Alva-Diaz C, Nieto-Gutierrez W, Taype-Rondan A, et al. Association between  
39  
40 daily working hours and depressive symptoms in resident physicians in Peru. *Rev*  
41  
42 *Colomb Psiquiatr (Engl Ed)* 2021;50(1):22-28.  
43  
44  
45  
46 32 Ogawa R, Seo E, Maeno T, et al. The relationship between long working hours and  
47  
48 depression among first-year residents in Japan. *BMC Med Educ* 2018;18(1):50.  
49  
50  
51  
52 33 Marzouk M, Ouanes-Besbes L, Ouanes I, et al. Prevalence of anxiety and  
53  
54 depressive symptoms among medical residents in Tunisia: a cross-sectional survey.  
55  
56 *BMJ Open* 2018;8(7): e020655.  
57  
58  
59 34 Sørensen JK, Pedersen AF, Bruun NH, et al. Alcohol and drug use among Danish  
60



- 1  
2  
3  
4 physicians. A nationwide cross-sectional study in 2014. *Dan Med J*.  
5  
6 2015;62(9):A5132.  
7  
8  
9 35 Silva MRG, Marcolan JF. Working conditions and depression in hospital  
10  
11 emergency service nurses. *Rev Bras Enferm*. 2020;73 Suppl1:e20180952.  
12  
13  
14 36 Tran TD, Hammarberg K, Kirkman M, et al. Alcohol use and mental health status  
15  
16 during the first months of COVID-19 pandemic in Australia. *J Affect Disord* 2020;  
17  
18 277:810-13.  
19  
20  
21 37 Ngasa SN, Sama CB, Dzekem BS, et al. Prevalence and factors associated with  
22  
23 depression among medical students in Cameroon: a cross-sectional study. *BMC*  
24  
25 *Psychiatry* 2017;17(1):216.  
26  
27  
28  
29 38 Song X, Fu W, Liu X, et al. Mental health status of medical staff in emergency  
30  
31 departments during the Coronavirus disease 2019 epidemic in China. *Brain Behav*  
32  
33 *Immun*. 2020;88:60-65.  
34  
35  
36  
37 39 Ruiz-Fernández MD, Ramos-Pichardo JD, Ibáñez-Masero O, Cabrera-Troya J,  
38  
39 Carmona-Rega MI, Ortega-Galán ÁM. Compassion fatigue, burnout, compassion  
40  
41 satisfaction and perceived stress in healthcare professionals during the COVID-19  
42  
43 health crisis in Spain. *J Clin Nurs*. 2020;29(21-22):4321-4330.  
44  
45  
46  
47 40 Xu HG, Johnston ANB, Greenslade JH, et al. Stressors and coping strategies of  
48  
49 emergency department nurses and doctors: A cross-sectional study. *Australas*  
50  
51 *Emerg Care*. 2019;22(3):180-86.  
52  
53  
54  
55 41 Lu W, Wang H, Lin Y, Li L. Psychological status of medical workforce during the  
56  
57 COVID-19 pandemic: A cross-sectional study. *Psychiatry Res*. 2020;288:112936.  
58  
59  
60

- 1  
2  
3  
4 42 Hunsaker S, Chen HC, Maughan D, Heaston S. Factors that influence the  
5  
6 development of compassion fatigue, burnout, and compassion satisfaction in  
7  
8 emergency department nurses. *J Nurs Scholarsh*. 2015;47(2):186-194.  
9  
10  
11 43 Jo M, Na H, Jung YE. Mediation Effects of Compassion Satisfaction and  
12  
13 Compassion Fatigue in the Relationships Between Resilience and Anxiety or  
14  
15 Depression Among Hospice Volunteers. *J Hosp Palliat Nurs* 2020;22(3):246-53.  
16  
17  
18 44 Hegney DG, Craigie M, Hemsworth D, et al. Compassion satisfaction, compassion  
19  
20 fatigue, anxiety, depression and stress in registered nurses in Australia: study 1  
21  
22 results. *J Nurs Manag* 2014;22(4):506-18.  
23  
24  
25  
26  
27 45 de Wit K. Burnout and depression among Canadian emergency physicians. *CJEM*.  
28  
29 2020 ;22(5): 559-560.  
30  
31  
32  
33  
34  
35  
36  
37  
38  
39  
40  
41  
42  
43  
44  
45  
46  
47  
48  
49  
50  
51  
52  
53  
54  
55  
56  
57  
58  
59  
60

**IJNS AUTHOR CHECKLIST** *Authors of all papers should submit this checklist together with their manuscript. The checklist will be made available during the submission process online to all authors and full step-by-step guidance given.*

*Part 1 identifies basic requirements for the manuscript submission (mandatory for all submissions)*

*Part 2 identifies recognized guidelines for scientific reporting, which you should use to prepare your manuscript (required for systematic reviews and original research)*

*Part 3 is a self assessment checklist that is designed to help to ensure that your research or review manuscript meets basic standards and the journal's Guide for Authors. (optional only)*

| <b>PART 1 Basic requirements</b>                                                       | <b>Author response or further detail</b>                                                                                                                                                                                                                                                                                                                                                          | <b>Tick</b> |
|----------------------------------------------------------------------------------------|---------------------------------------------------------------------------------------------------------------------------------------------------------------------------------------------------------------------------------------------------------------------------------------------------------------------------------------------------------------------------------------------------|-------------|
| Word count                                                                             | 3962                                                                                                                                                                                                                                                                                                                                                                                              |             |
| Was ethical approval given and by whom? (give any reference number)                    | the Institutional Review Board of Xiangya Nursing School, Central South University (Approval number E202062)                                                                                                                                                                                                                                                                                      |             |
| Please state any conflicts of interest                                                 | None                                                                                                                                                                                                                                                                                                                                                                                              |             |
| Please state sources of funding and the role of funders in the conduct of the research | None                                                                                                                                                                                                                                                                                                                                                                                              |             |
| Please state any study registry number (e.g. ISRCTN)                                   | Not applicable                                                                                                                                                                                                                                                                                                                                                                                    |             |
| Title                                                                                  | The title is in the format 'Topic / question: design/type of paper' and identifies the population / care setting studied.<br>(e.g. <i>The effectiveness of telephone support for adolescents with insulin dependant diabetes: controlled before and after study: the structure is optional for discussion papers, editorials and commentaries</i> )                                               | Page1       |
| Abstract                                                                               | A structured abstract appropriate to the design (see <i>guidelines for authors</i> ). Reports of controlled trials should follow the CONSORT format (does not apply to editorials or commentaries, Abstracts for discussion papers need not be structured)                                                                                                                                        | Page1       |
| Key words                                                                              | Between four and ten key words have been provided in alphabetical order, which accurately identify the paper's subject, purpose, method and focus. Use the Medical Subject Headings (MeSH®) thesaurus or Cumulative Index to Nursing and Allied Health (CINAHL) headings where possible (see <a href="http://www.nlm.nih.gov/mesh/meshhome.html">http://www.nlm.nih.gov/mesh/meshhome.html</a> ). | Page2       |
| Highlights                                                                             | Bullet points have been included that identify existing research knowledge relating to the specific research question / topic (what is already known) and a summary of the new knowledge added by this study (what the paper adds) (see <i>Guide for Authors</i> , does not apply to editorials or commentaries)                                                                                  | Page2       |
| References                                                                             | Citations accord to the journal's format (Author, date) and reference list includes full details of all cited references in the proper format and alphabetical order (see <i>Guide for Authors</i> )                                                                                                                                                                                              | Page12-17   |
| Other Published accounts                                                               | All published and in press accounts of the study from which data in this paper originate are referred to in the paper and the relationship between this and other publications from the same study is made clear (see <i>Guide for Authors</i> )                                                                                                                                                  |             |
|                                                                                        | The study is referred to by a distinctive name which will be used in any future publications to identify that it as the same study.                                                                                                                                                                                                                                                               |             |
|                                                                                        | Please upload copies of all previous, current and under review publications from this study and / or give full details below                                                                                                                                                                                                                                                                      |             |
| Authorship                                                                             | All authors and contributors sufficiently acknowledged as per Guide for Authors.                                                                                                                                                                                                                                                                                                                  | Page11      |

| <b>PART 2<br/>Standards of<br/>reporting</b>                   | <p>The editors require that manuscripts adhere to recognized reporting guidelines relevant to the research design used. These identify matters that should be addressed in your paper. Please indicate which guidelines you have referred to.</p> <p>These are not quality assessment frameworks and your study need not meet all the criteria implied in the reporting guideline to be worthy of publication in the IJNS. The checklists do identify essential matters that should be considered and reported upon. For example, a controlled trial may or may not be blinded but it is important that the paper identifies whether or not participants, clinicians and outcome assessors were aware of treatment assignments.</p> <p><b>**You are encouraged (although not required) to submit a checklist from the appropriate reporting guideline together with your paper as a guide to the editors and reviewers of your paper.</b></p> <p><i>Reporting guidelines endorsed by the IJNS are listed below:</i></p> | <b>Guideline referred to</b> | <b>Checklist submitted**</b> |
|----------------------------------------------------------------|-------------------------------------------------------------------------------------------------------------------------------------------------------------------------------------------------------------------------------------------------------------------------------------------------------------------------------------------------------------------------------------------------------------------------------------------------------------------------------------------------------------------------------------------------------------------------------------------------------------------------------------------------------------------------------------------------------------------------------------------------------------------------------------------------------------------------------------------------------------------------------------------------------------------------------------------------------------------------------------------------------------------------|------------------------------|------------------------------|
| Observational cohort, case control and cross sectional studies | STROBE <b>Strengthening the Reporting of Observational Studies in Epidemiology</b><br><a href="http://www.equator-network.org/index.aspx?o=1032">http://www.equator-network.org/index.aspx?o=1032</a>                                                                                                                                                                                                                                                                                                                                                                                                                                                                                                                                                                                                                                                                                                                                                                                                                   | √                            |                              |
| Quasi experimental / non-randomized evaluations                | TREND - Transparent Reporting of Evaluations with Non-randomized Designs<br><a href="http://www.equator-network.org/index.aspx?o=1032">http://www.equator-network.org/index.aspx?o=1032</a>                                                                                                                                                                                                                                                                                                                                                                                                                                                                                                                                                                                                                                                                                                                                                                                                                             |                              |                              |
| Randomised (and quasi-randomised) controlled trial             | CONSORT – Consolidated Standards of Reporting Trials<br><a href="http://www.equator-network.org/index.aspx?o=1032">http://www.equator-network.org/index.aspx?o=1032</a>                                                                                                                                                                                                                                                                                                                                                                                                                                                                                                                                                                                                                                                                                                                                                                                                                                                 |                              |                              |
| Study of Diagnostic accuracy / assessment scale                | STARD Standards for the Reporting of Diagnostic Accuracy studies<br><a href="http://www.equator-network.org/index.aspx?o=1032">http://www.equator-network.org/index.aspx?o=1032</a>                                                                                                                                                                                                                                                                                                                                                                                                                                                                                                                                                                                                                                                                                                                                                                                                                                     |                              |                              |
| Systematic Review of Controlled Trials                         | PRISMA - Preferred Reporting Items for Systematic Reviews and Meta-Analyses<br><a href="http://www.equator-network.org/index.aspx?o=1032">http://www.equator-network.org/index.aspx?o=1032</a>                                                                                                                                                                                                                                                                                                                                                                                                                                                                                                                                                                                                                                                                                                                                                                                                                          |                              |                              |
| Systematic Review of Observational Studies                     | MOOSE Meta-analysis of Observational Studies in Epidemiology<br><a href="http://www.equator-network.org/index.aspx?o=1032">http://www.equator-network.org/index.aspx?o=1032</a>                                                                                                                                                                                                                                                                                                                                                                                                                                                                                                                                                                                                                                                                                                                                                                                                                                         |                              |                              |
|                                                                | <i>Qualitative researchers might wish to consult the guideline listed below</i>                                                                                                                                                                                                                                                                                                                                                                                                                                                                                                                                                                                                                                                                                                                                                                                                                                                                                                                                         |                              |                              |
| Qualitative studies                                            | COREQ: Consolidated criteria for reporting qualitative research Tong, A., Sainsbury, P., Craig, J., 2007. Consolidated criteria for reporting qualitative research (COREQ): a 32-item checklist for interviews and focus groups. <i>International Journal for Quality in Health Care</i> 19 (6), 349-357. ( <a href="http://dx.doi.org/10.1093/intqhc/mzm042">http://dx.doi.org/10.1093/intqhc/mzm042</a> )                                                                                                                                                                                                                                                                                                                                                                                                                                                                                                                                                                                                             |                              |                              |
| Other (please give source)                                     |                                                                                                                                                                                                                                                                                                                                                                                                                                                                                                                                                                                                                                                                                                                                                                                                                                                                                                                                                                                                                         |                              |                              |
| Not applicable (please elaborate)                              |                                                                                                                                                                                                                                                                                                                                                                                                                                                                                                                                                                                                                                                                                                                                                                                                                                                                                                                                                                                                                         |                              |                              |

|               |                                                                                                                                                                                                                                                                                                                                                                                                                                                                                                                                                  |  |
|---------------|--------------------------------------------------------------------------------------------------------------------------------------------------------------------------------------------------------------------------------------------------------------------------------------------------------------------------------------------------------------------------------------------------------------------------------------------------------------------------------------------------------------------------------------------------|--|
| <b>PART 3</b> | <b>Part 3 Self-assessment checklist for research and reviews (optional)</b><br><br>You might like to review the content of your paper before submission to ensure that the essential elements are present. We do not intend that this checklist should dictate sub headings that you must use (although you might find it useful) but rather give a guide to content and issues that should (in general) always be considered. You might find it helpful to note the page number where some of the key issues are dealt with to assist reviewers |  |
|---------------|--------------------------------------------------------------------------------------------------------------------------------------------------------------------------------------------------------------------------------------------------------------------------------------------------------------------------------------------------------------------------------------------------------------------------------------------------------------------------------------------------------------------------------------------------|--|

| <b>Section</b>                          | <b>Descriptor</b>                                                                                                                                                                                                                                                                            | <b>TICK</b> |
|-----------------------------------------|----------------------------------------------------------------------------------------------------------------------------------------------------------------------------------------------------------------------------------------------------------------------------------------------|-------------|
| <b>a) Primary research only</b>         |                                                                                                                                                                                                                                                                                              |             |
| Background                              | A statement of the problem / phenomena of interest, a brief summary of existing research which addresses the topic and an explanation of the purpose of the current study / review in relation to this.                                                                                      | Page2       |
| <b>METHODS</b>                          | Clear statement of the aims, objectives (hypothesis) and research design                                                                                                                                                                                                                     | Page4       |
| Settings                                | The settings and locations where the study took place                                                                                                                                                                                                                                        | Page4       |
| Inclusion Criteria                      | Eligibility criteria for participants – inclusion and exclusion criteria                                                                                                                                                                                                                     | Page5       |
| Sampling                                | Method of sampling and if relevant allocation to groups (e.g. convenience, random) and <i>description</i> of sampling, recruitment and allocation procedures .                                                                                                                               | Page4       |
| Sample size                             | How sample size was determined.                                                                                                                                                                                                                                                              | Page5       |
| Outcomes and data collection procedures | Clearly defined primary and secondary outcome measures (when applicable), Setting and methods of data collection and methods used to enhance the quality of data collection (e.g., multiple observations, training of assessors).                                                            | Page5       |
| Analysis Methods                        | Statistical methods used / approaches to qualitative analysis including procedures to ensure accuracy / validity / truthfulness of accounts.                                                                                                                                                 | Page6       |
| Ethical review*                         | Details of ethical scrutiny / approvals obtained.                                                                                                                                                                                                                                            | Page12      |
| <b>RESULTS</b><br>Participant flow      | Flow of participants through each stage of selection, allocation, follow up / inclusion in analysis (a diagram is strongly recommended). Describe protocol deviations from study as planned, together with reasons.                                                                          | N/A         |
| Recruitment                             | Dates defining the periods of recruitment and follow-up.                                                                                                                                                                                                                                     | N/A         |
| Baseline data                           | Baseline demographic and clinical characteristics of each group.                                                                                                                                                                                                                             | N/A         |
| Results                                 | Point estimates, exact p-values and confidence intervals for quantitative studies. Qualitative analyses are supported by appropriate quotations which support the derived themes / categories and which are anonymously attributed to participants (using pseudonyms, numbers or equivalent) | Page6       |
| <b>DISCUSSION</b>                       | Brief recapitulation / summary of the results taking into account study hypotheses / aims                                                                                                                                                                                                    | Page8       |
| Interpretation                          | Interpretation of the results, taking into account study limitations                                                                                                                                                                                                                         | Page10      |
| Overall evidence                        | Assessment of the current state of knowledge in the context of study results and other evidence.                                                                                                                                                                                             | Page10      |
| Implications                            | Consideration of the implications of the current state of knowledge for further research and or practice                                                                                                                                                                                     | Page11      |

# BMJ Open

## Compassion fatigue, burnout, compassion satisfaction and depression among emergency department physicians and nurses: a cross-sectional study

|                                 |                                                                                                                                                                                                                                                                                                                                         |
|---------------------------------|-----------------------------------------------------------------------------------------------------------------------------------------------------------------------------------------------------------------------------------------------------------------------------------------------------------------------------------------|
| Journal:                        | <i>BMJ Open</i>                                                                                                                                                                                                                                                                                                                         |
| Manuscript ID                   | bmjopen-2021-055941.R2                                                                                                                                                                                                                                                                                                                  |
| Article Type:                   | Original research                                                                                                                                                                                                                                                                                                                       |
| Date Submitted by the Author:   | 26-Feb-2022                                                                                                                                                                                                                                                                                                                             |
| Complete List of Authors:       | Ma, Huan; Sichuan Vocational College of Health and Rehabilitation, nursing department<br>Huang, Shuang; The people's hospital of Neijiang Dongxing District, Emergency Department<br>We, Bo; The people's hospital of Neijiang Dongxing District, Emergency Department<br>Zhong, Ying; Central South University, Xiangya Nursing School |
| <b>Primary Subject Heading</b>: | Mental health                                                                                                                                                                                                                                                                                                                           |
| Secondary Subject Heading:      | Mental health, Emergency medicine, Public health                                                                                                                                                                                                                                                                                        |
| Keywords:                       | Adult psychiatry < PSYCHIATRY, PUBLIC HEALTH, MENTAL HEALTH, Depression & mood disorders < PSYCHIATRY                                                                                                                                                                                                                                   |
|                                 |                                                                                                                                                                                                                                                                                                                                         |

SCHOLARONE™  
Manuscripts



I, the Submitting Author has the right to grant and does grant on behalf of all authors of the Work (as defined in the below author licence), an exclusive licence and/or a non-exclusive licence for contributions from authors who are: i) UK Crown employees; ii) where BMJ has agreed a CC-BY licence shall apply, and/or iii) in accordance with the terms applicable for US Federal Government officers or employees acting as part of their official duties; on a worldwide, perpetual, irrevocable, royalty-free basis to BMJ Publishing Group Ltd ("BMJ") its licensees and where the relevant Journal is co-owned by BMJ to the co-owners of the Journal, to publish the Work in this journal and any other BMJ products and to exploit all rights, as set out in our [licence](#).

The Submitting Author accepts and understands that any supply made under these terms is made by BMJ to the Submitting Author unless you are acting as an employee on behalf of your employer or a postgraduate student of an affiliated institution which is paying any applicable article publishing charge ("APC") for Open Access articles. Where the Submitting Author wishes to make the Work available on an Open Access basis (and intends to pay the relevant APC), the terms of reuse of such Open Access shall be governed by a Creative Commons licence – details of these licences and which [Creative Commons](#) licence will apply to this Work are set out in our licence referred to above.

Other than as permitted in any relevant BMJ Author's Self Archiving Policies, I confirm this Work has not been accepted for publication elsewhere, is not being considered for publication elsewhere and does not duplicate material already published. I confirm all authors consent to publication of this Work and authorise the granting of this licence.

# Compassion fatigue, burnout, compassion satisfaction and depression among emergency department physicians and nurses: a cross-sectional study

Huan Ma<sup>1</sup>, Shuang-quan Huang<sup>2</sup>, Bo We<sup>2</sup>, Ying Zhong<sup>3</sup>

<sup>1</sup>Sichuan Vocational College of Health and Rehabilitation, Zigong, Sichuan, China

<sup>2</sup>Emergency Department, The people's hospital of Neijiang Dongxing District, Neijiang, Sichuan, China

<sup>3</sup>Xiangya Nursing School, Central South University, Changsha, Hunan, China

**Corresponding author:**

Correspondence should be addressed to: Bo We, Emergency Department, The people's hospital of Neijiang Dongxing District, Neijiang, Sichuan, China. email: cswzy2017@163.com

## Abstract

**Objectives:** Emergency department physicians and nurses are at high risk of compassion fatigue, burnout and depression. The purpose of this study was to examine the interrelationship between compassion fatigue, burnout, compassion satisfaction and depression in emergency department physicians and nurses.

**Design:** A cross-sectional study.

**Setting:** This study was conducted in five tertiary hospitals in five different cities across the province of Sichuan, China, in 2021.

**Participants:** A total of 342 emergency department physicians and nurses participated in the study.

**Main outcome measures:** Compassion fatigue, burnout, compassion satisfaction and depression scores.

**Results:** Among the study participants, 100% were found to have depressive



1  
2  
3  
4 symptoms, 27.8% had low compassion satisfaction, 2.3% had high burnout and 3.8%  
5  
6 had compassion fatigue. In the final multiple linear regression model, marital status  
7  
8 ( $p=0.008$ ; 95% confidence interval [CI],  $-5.205$  to  $-0.789$ ), history of chronic disease  
9  
10 ( $p=0.003$ ; 95% CI,  $-6.461$  to  $-1.386$ ), compassion satisfaction ( $p<0.001$ ; 95% CI,  
11  
12  $0.593$  to  $1.274$ ), burnout ( $p=0.019$ ; 95% CI,  $0.084$  to  $0.930$ ) and compassion fatigue  
13  
14 ( $p<0.001$ ; 95% CI,  $-1.527$  to  $-1.053$ ) among emergency department physicians and  
15  
16 nurses were considered to be significant predictors of depression.  
17  
18  
19  
20  
21

22 **Conclusions:** The prevalence of depression among emergency department physicians  
23  
24 and nurses is high in the province of Sichuan, China. Compassion fatigue, burnout  
25  
26 and compassion satisfaction were significantly associated with depression in  
27  
28 emergency department physicians and nurses. Hospital administrations should  
29  
30 consider these findings to develop appropriate psychological interventions and  
31  
32 strategies, to prevent, alleviate or treat severe depression among emergency  
33  
34 department physicians and nurses in the province of Sichuan.  
35  
36  
37  
38  
39

40 **Keywords:** Compassion fatigue, burnout, compassion satisfaction, depression,  
41  
42 emergency department  
43  
44

### 45 **Strengths and limitations of this study**

46  
47  
48 •This is a novel study conducted in the province of Sichuan, China, which describes  
49  
50 the prevalence of compassion fatigue, burnout, compassion satisfaction and  
51  
52 depression and the influencing factors associated with depression among emergency  
53  
54 department physicians and nurses.  
55  
56

57  
58 •The causal association between compassion fatigue, burnout, compassion satisfaction  
59  
60

1  
2  
3  
4 and depression could not be established since this was a cross-sectional study.  
5

6 •Data on compassion fatigue, burnout, compassion satisfaction and depression were  
7  
8 collected based on the participants' self-reports, which may have led to information  
9  
10 bias.  
11  
12

### 13 14 **Introduction**

15  
16 Emergency departments are fast-paced, high-pressure environments in which the  
17  
18 medical staff encounter heavy workloads, violence, interpersonal conflict, high  
19  
20 patient load, mass casualty incidents; moreover, limited resources and poor skill mix  
21  
22 compound the problem.<sup>1 2</sup> Emergency department physicians and nurses who are at  
23  
24 the frontline of a demanding health care system take significant responsibility for the  
25  
26 care of emergency patients, regardless of overstretched and overburdened resources.<sup>3</sup>  
27  
28 Emergency physicians and nurses who witness alarming morbidity and mortality on a  
29  
30 daily basis, can experience adverse physical and mental health problems, such as  
31  
32 compassion fatigue, depression and burnout.<sup>4</sup> It has been reported that compassion  
33  
34 fatigue, burnout and depression afflicting emergency physicians and nurses can not  
35  
36 only harm individual mental health, but can also cause a series of fateful  
37  
38 consequences, including medical errors, poor-quality patient care and increased  
39  
40 patient mortality during hospital stay.<sup>5-7</sup>  
41  
42  
43  
44  
45  
46  
47  
48  
49

50  
51 Compassion fatigue, which is considered as an occupational hazard in healthcare,  
52  
53 is conceptualized as “the natural, consequent behaviors and emotions resulting from  
54  
55 knowing about a traumatizing event experienced by a significant other – the stress  
56  
57 resulting from helping or wanting to help a traumatized or suffering person”.<sup>8 9</sup>  
58  
59  
60

1  
2  
3  
4 Compassion fatigue can result in a series of physical, mental and work-related  
5  
6 symptoms that seriously affect quality of patient care and staff-patient relationships.<sup>10</sup>  
7  
8  
9 Chu reported that compassion fatigue has a significant adverse effect on job  
10  
11 performance and organizational citizenship behavior.<sup>11</sup> A study conducted in the U.S.  
12  
13 indicated that about 80% of emergency nurses had moderate to high levels of  
14  
15 compassion fatigue.<sup>12</sup> Barnett et al. noted that compassion fatigue was positively  
16  
17 associated with emotional display.<sup>13</sup> Burnout is a work-related syndrome and  
18  
19 predominantly defined as “high emotional exhaustion, depersonalization and a low  
20  
21 level of personal accomplishment”.<sup>14</sup> The prevalence of burnout among emergency  
22  
23 medical staff was very high and burnout can cause serious consequences.<sup>15-17</sup>  
24  
25 Moukarzel et al. noted that 34.6% emergency medical staff had severe burnout and  
26  
27 Soltanifar et al. found that 84.5% emergency physicians had experienced high  
28  
29 emotional exhaustion.<sup>15 18</sup> Jyothindran’s findings indicated that severe burnout was  
30  
31 highly correlated with medical error and turnover.<sup>19</sup> Compassion satisfaction is  
32  
33 defined as the emotions generated and the sense of achievement derived from helping  
34  
35 and caring for patients, whether related to direct assistance or support in improvement  
36  
37 of patients’ condition.<sup>20</sup>

38  
39  
40  
41  
42  
43  
44  
45  
46  
47  
48 Depression, a common and serious mental illness, is listed by the World Health  
49  
50 Organization (WHO) as one of the most important factors contributing to global  
51  
52 disability and the main contributor to suicide deaths at all ages.<sup>21</sup> The most common  
53  
54 symptoms associated with depression are persistent sadness, a loss of interest and  
55  
56 energy, insomnia, headache, unexplained pain, gastrointestinal symptoms,  
57  
58  
59  
60

1  
2  
3  
4 hopelessness and thoughts of self-harm or suicide.<sup>22</sup> Severe depression can lead to  
5  
6 many negative outcomes. For example, a recent study on emergency department  
7  
8 nurses during the COVID-19 pandemic in China showed that depression had an  
9  
10 adverse effect on quality of patient care and nurses' quality of life.<sup>23</sup> Vasconcelos et al.  
11  
12 found that depressive symptoms were significantly associated with burnout.<sup>24</sup>  
13  
14  
15  
16  
17  
18  
19  
20  
21  
22  
23  
24  
25  
26  
27  
28  
29  
30  
31  
32  
33  
34  
35  
36  
37  
38  
39  
40  
41  
42  
43  
44  
45  
46  
47  
48  
49  
50  
51  
52  
53  
54  
55  
56  
57  
58  
59  
60

Emergency medical staff are exposed to all kinds of stress every day.<sup>25</sup> Hence, special attention should be paid to the psychological status of emergency physicians and nurses.

Although extensive studies on depression have been conducted, most of the studies have only focused on nurses.<sup>23 24</sup> Moreover, few studies have been carried out to explore the factors that influence the development of depression in emergency physicians and nurses.<sup>5 25</sup> Considering that emergency physicians and nurses have emotionally demanding tasks and work in high-pressure situations, the aim of this study was to determine the prevalence of compassion fatigue, burnout, compassion satisfaction and depression and explore the interrelationship of these among this highly vulnerable population.

## Methods

### Study design and participants

A cross-sectional survey was conducted among emergency physicians and nurses across five different cities of Sichuan province, China. A convenience sample was used to recruit physicians and registered nurses working in the emergency department.

The eligibility criteria were as follows: (1) being licensed physicians and registered

1  
2  
3  
4 nurses; (2) with more than one year's work experience; (3) working in emergency  
5  
6 department; (4) provided consent to participate. The data were collected by five  
7  
8 trained research assistants from January to February 2021. A set of questionnaires was  
9  
10 distributed to all emergency medical staff by the five tertiary hospitals' administration.  
11  
12 All the participants were informed that their participation was voluntary and that their  
13  
14 data would be anonymised. A total of 350 emergency physicians and nurses filled in  
15  
16 the questionnaires, out of which 342 questionnaires were returned (an effective  
17  
18 response rate of 97.7%).  
19  
20  
21  
22  
23

### 24 25 **Measurements**

26  
27 The questionnaire comprised three instruments: a demographic survey, the  
28  
29 Professional Quality of Life (ProQOLv5) scale and the Center for Epidemiologic  
30  
31 Studies Depression (CES-D) scale. Sociodemographic data were collected with a  
32  
33 self-designed questionnaire, including position (physician, nurse), age (less than 35  
34  
35 years, 35 years or older), gender (male, female), marital status (married, unmarried),  
36  
37 education level (diploma, associate degree, bachelor's degree, master's degree or  
38  
39 higher), professional title (primary, intermediate, senior), work experience (less than 5  
40  
41 years, 5–10 years, over 10 years), weekly night shifts (none, 1–2, 3–4, more than 4),  
42  
43 daily work hours (less than 9 h, 9–12 h, over 12 h), cigarette use (yes, no), alcohol use  
44  
45 (yes, no) and history of chronic disease (yes, no). According to the level of experience  
46  
47 of the professionals, physicians and nurses' professional ranks in China were divided  
48  
49 into three categories, including primary titles, intermediate titles and senior titles.  
50  
51  
52  
53  
54  
55  
56  
57

### 58 **Professional quality of life scale**

1  
2  
3  
4 Compassion fatigue, burnout and compassion satisfaction levels were assessed using  
5  
6 the ProQOLv5. The questionnaire includes 30 items with a Likert scale of 5 points  
7  
8 (1=never; 5=always), 10 items for compassion satisfaction, 10 items for burnout and  
9  
10 10 items for compassion fatigue.<sup>20</sup> The level of compassion satisfaction was divided  
11  
12 into less than 22 (low), 23–41 (middle) and more than 42 (high). For compassion  
13  
14 fatigue and burnout, a score of 22 or less represents low levels, 23–41 represents  
15  
16 middle levels, and a score of more than 42 high levels. The alpha reliability  
17  
18 coefficients for compassion satisfaction, burnout and compassion fatigue were 0.775,  
19  
20 0.775 and 0.807, respectively.  
21  
22  
23  
24  
25  
26

### 27 **Depression**

28  
29 The CES-D is a 20-item questionnaire intended to measure the frequency of  
30  
31 occurrence of symptoms of depression over the past week using a 5-point Likert scale  
32  
33 (each item was scored as follows: 0=rarely or none of the time to 3=most or all of the  
34  
35 time; total score range, 0–60).<sup>26</sup> The CES-D scale has four reverse-scored items (items  
36  
37 4, 8, 12 and 16) and covers four major symptoms of depression, including (1)  
38  
39 depressed affect (e.g. sadness, crying); (2) absence of positive affect (e.g. hope,  
40  
41 enjoyment); (3) somatic symptoms (e.g., appetite problems, problems “getting  
42  
43 going”); and (4) interpersonal relations (e.g. perceiving others as unfriendly).  
44  
45 Standard cut-off value  $\geq 16$  indicates the likely presence of depression. The  
46  
47 Cronbach’s  $\alpha$  in the current study was 0.916.  
48  
49  
50  
51  
52  
53  
54

### 55 **Statistical analysis**

56  
57 Statistical analysis was conducted using SPSS version 22.0 (SPSS Inc., Chicago, IL,  
58  
59  
60

1  
2  
3  
4 USA). Continuous variables were summarized as mean with standard deviation (SD),  
5  
6 while categorical variables were presented as frequencies and percentages.  
7  
8  
9 Independent samples t-test, and one-way analysis of variance (ANOVA) were used to  
10  
11 compare participants' depression by demographic characteristics. Associations  
12  
13 between compassion satisfaction, burnout, compassion fatigue and depression among  
14  
15 emergency physicians and nurses were analysed using Pearson's correlation analysis.  
16  
17  
18 A multiple linear regression model was used to estimate the effect of compassion  
19  
20 satisfaction, burnout, compassion fatigue and other demographic variables on  
21  
22 depression. A *p* value of less than 0.05 was considered statistically significant  
23  
24  
25  
26  
27 (two-tailed).  
28

### 29 30 **Patient and public involvement**

31  
32 Patients or members of the public were not involved in the design, reporting or  
33  
34 dissemination plans of our research.  
35  
36

### 37 38 39 **Results**

40  
41 The participants' baseline characteristics are shown in Table 1. The mean age was  
42  
43 32.59 years (SD, 8.19; age range, 20–58 years). Most participants were female  
44  
45 (70.5%), nurses (71.1%), married (68.7.0%), held a bachelor degree (62.9%) and had  
46  
47 a primary professional title (57.0%).  
48  
49

50  
51  
52 The differences in depression scores according to the characteristics of  
53  
54 emergency physicians and nurses are also presented in Table 1. There were significant  
55  
56 differences in depression scores based on marital status ( $p<0.01$ ), professional title  
57  
58 ( $p<0.05$ ), daily work hours ( $p<0.05$ ), alcohol use ( $p<0.05$ ) and history of chronic  
59  
60

disease ( $p < 0.01$ ).

**Table 1. Demographic characteristics of emergency department physicians and nurses (N=342).**

| Variables               | N (%)      | Depression<br>Mean (SD) |
|-------------------------|------------|-------------------------|
| Position                |            | $P=0.181$               |
| Physician               | 99 (28.9)  | 38.60 (11.76)           |
| Nurse                   | 243 (71.1) | 36.86 (10.52)           |
| Age (years)             |            | $P=0.991$               |
| <35                     | 236 (69.0) | 37.37 (10.23)           |
| ≥35                     | 106 (31.0) | 37.35 (12.32)           |
| Gender                  |            | $P=0.162$               |
| Male                    | 101 (29.5) | 38.64 (12.22)           |
| Female                  | 241 (70.5) | 36.83 (10.28)           |
| Marital status          |            | $P=0.002$               |
| Unmarried               | 107 (31.3) | 40.01(11.05)            |
| Married                 | 235 (68.7) | 36.16(10.64)            |
| Education level         |            | $P=0.071$               |
| Associate degree        | 102 (29.8) | 36.16 (9.97)            |
| Bachelor degree         | 215 (62.9) | 38.33 (11.49)           |
| Master degree           | 25 (7.3)   | 34.00 (8.24)            |
| Profession title        |            | $P=0.034$               |
| Primary                 | 195 (57.0) | 37.57 (10.56)           |
| Intermediate            | 108 (31.6) | 38.48 (11.51)           |
| Senior                  | 39 (11.4)  | 33.25 (10.18)           |
| Work experience (years) |            | $P=0.810$               |
| <5                      | 94 (27.5)  | 37.48 (10.09)           |
| 5-10                    | 95 (27.8)  | 37.88 (10.96)           |
| >10                     | 153 (44.7) | 36.97 (11.39)           |
| Weekly night shifts     |            | $P=0.063$               |
| 0                       | 46 (13.5)  | 33.60 (9.35)            |
| 1-2                     | 148 (43.4) | 37.89 (11.19)           |
| 3-4                     | 106 (31.0) | 37.46 (11.10)           |
| >4                      | 42 (12.3)  | 39.40 (10.35)           |
| Daily work hours(h)     |            | $P=0.017$               |
| <9                      | 161 (47.1) | 35.60 (10.29)           |
| 9-12                    | 118 (34.5) | 39.19 (11.13)           |
| >12                     | 163 (18.4) | 38.44 (11.45)           |
| Cigarette use           |            | $P=0.244$               |
| Yes                     | 38 (11.1)  | 39.31 (12.13)           |
| No                      | 304 (88.9) | 37.12 (10.74)           |
| Alcohol use             |            | $P=0.019$               |
| Yes                     | 50 (14.6)  | 40.70 (10.91)           |



|                            |            |                 |
|----------------------------|------------|-----------------|
| No                         | 292 (85.4) | 36.79 (10.82)   |
| History of chronic disease |            | <i>P</i> =0.001 |
| Yes                        | 58 (17.0)  | 41.79 (12.21)   |
| No                         | 284 (83.0) | 36.46 (10.41)   |

As depicted in Table 2, compassion satisfaction levels were moderate in approximately 70.8% of emergency physicians and nurses, low in 27.8% of them and high in 1.4%. Of the participants, 2.3% had a high burnout score, 66 (19.3%) had a low burnout score and 3% of the respondents had a high compassion fatigue score. The mean scores for depression, compassion satisfaction, burnout and compassion fatigue were 37.36 (SD, 10.91), 26.70 (SD, 6.36), 27.74 (SD, 6.19) and 30.19 (SD, 6.59), respectively.

**Table 2. Compassion satisfaction, burnout, compassion fatigue and depression levels among emergency physicians and nurses (N=342).**

| Dimensions              | N (%)      | Mean  | SD    |
|-------------------------|------------|-------|-------|
| Depression              |            | 37.36 | 10.91 |
| Compassion satisfaction |            | 26.70 | 6.36  |
| Low                     | 95 (27.8)  | -     | -     |
| Medium                  | 242 (70.8) | -     | -     |
| High                    | 5 (1.4)    | -     | -     |
| Burnout                 |            | 27.74 | 6.19  |
| Low                     | 66 (19.3)  | -     | -     |
| Medium                  | 268 (78.4) | -     | -     |
| High                    | 8 (2.3)    | -     | -     |
| Compassion fatigue      |            | 30.19 | 6.59  |
| Low                     | 43 (12.6)  | -     | -     |
| Medium                  | 286 (83.6) | -     | -     |
| High                    | 13 (3.8)   | -     | -     |

Both compassion satisfaction and burnout were significantly correlated with three depression metrics: depressed affect, somatic symptoms and inter-personal relations. Apart from positive affect, there was no relationship between the other sub-scales of depression and compassion fatigue (Table 3).

**Table 3. Correlation between dimensions of compassion satisfaction, burnout, compassion fatigue and depression (N=342).**

|                         | Depression | Depressed Affect | Somatic | Positive Affect | Inter-personal |
|-------------------------|------------|------------------|---------|-----------------|----------------|
| Compassion satisfaction | 0.282**    | 0.319**          | 0.317** | 0.003           | 0.311**        |
| Burnout                 | 0.171**    | 0.214**          | 0.239** | -0.163**        | 0.247**        |
| Compassion fatigue      | -0.178**   | -0.092           | -0.021  | -0.430**        | 0.001          |

Note:\*\* $p < 0.01$

Depression was computed as outcome variable, and the independent variables comprised the demographic characteristics and the three dimensions of compassion fatigue. Table 4 shows that marital status, history of chronic disease, compassion satisfaction, burnout and compassion fatigue collectively accounted for 39.6% of the variance in depression ( $F = 28.952$ ,  $p < 0.001$ ,  $R^2 = 0.410$ , adjusted  $R^2 = 0.396$ ).

**Table 4. Multiple linear regression analysis of depression (N=342).**

| Dependent variables | Independent variables      | Unstandardised coefficient |       | Standardised coefficient |          | 95% CI   |             |             |
|---------------------|----------------------------|----------------------------|-------|--------------------------|----------|----------|-------------|-------------|
|                     |                            | B                          | SE    | Beta                     | <i>t</i> | <i>P</i> | Lower bound | Upper bound |
| Depression          | Marital status             | -2.997                     | 1.123 | -0.128                   | -2.670   | 0.008    | -5.205      | -0.789      |
|                     | History of chronic disease | -3.924                     | 1.290 | -0.135                   | -3.052   | 0.003    | -6.461      | -1.386      |
|                     | Compassion satisfaction    | 0.934                      | 0.173 | 0.545                    | 5.388    | <0.001   | 0.593       | 1.274       |
|                     | Burnout                    | 0.507                      | 0.215 | 0.288                    | 2.359    | 0.019    | 0.084       | 0.930       |
|                     | Compassion fatigue         | -1.290                     | 0.120 | -0.779                   | -10.707  | <0.001   | -1.527      | -1.053      |

## Discussion

The findings of the current study regarding the frequency and distribution of depression among emergency physicians and nurses show that the following characteristics were significantly associated with higher levels of depression—marital

1  
2  
3  
4 status: unmarried; intermediate professional title; consumption of alcohol; daily  
5  
6  
7 worktime between 9 and 12 h; and a history of chronic disease. Similar to our study, a  
8  
9 statistically significant difference was observed in the levels of depression among  
10  
11  
12 frontline doctors combating the COVID-19 pandemic in India with regard to marital  
13  
14 status.<sup>27</sup> One reason for this could be that spousal support is beneficial for maintaining  
15  
16  
17 good mental health.<sup>28</sup> Our findings concur with those of Xiao et al. who found that  
18  
19 depression levels were different among different professional titles and that an  
20  
21 intermediate title was an independent influencing factor.<sup>29</sup> This could be explained by  
22  
23 the fact that compared to medical staff with an intermediate title, physicians and  
24  
25 nurses with a senior title have a richer work experience, a higher income and a lower  
26  
27 family burden.<sup>30</sup> The findings of this study are in accordance with those of two  
28  
29 previous studies that reported that working excessively long hours on a daily basis  
30  
31 was significantly associated with the frequency of depressive symptoms.<sup>31</sup> 32  
32  
33  
34  
35  
36  
37  
38  
39  
40  
41  
42  
43  
44  
45  
46  
47  
48  
49  
50  
51  
52  
53  
54  
55  
56  
57  
58  
59  
60  
Emergency physicians and nurses endure a heavy burden of work imposed on them  
on a daily basis and most often without a day of safety rest. Work overload and  
chronic sleep deprivation can increase the risk for depression.<sup>33</sup> A study conducted by  
Sørensen et al. among 1,943 Danish physicians noted that the emergency department  
had the highest proportion of risky alcohol use.<sup>34</sup> Besides, the study of Silva et al.  
reported that the prevalence of depressive symptoms among emergency nurses in  
Brazil is 95.24%.<sup>35</sup> Emergency physicians and nurses who had severe depressive  
symptoms were more likely to be drinking alcohol to regulate these emotional  
states.<sup>36</sup> Our results are also similar to those reported in a study by Ngasa et al. that

1  
2  
3  
4 found that the presence of a chronic disease was independently associated with  
5  
6 depression.<sup>37</sup>  
7  
8  
9

10 Our study found a considerably high prevalence of depressive symptoms among  
11  
12 emergency physicians and nurses, and the prevalence of depressive symptoms  
13  
14 reached up to 100%, which is much higher than the previous study.<sup>38</sup> The high level of  
15  
16 depression may be associated with factors, such as excessive workload, overcrowding  
17  
18 and resource shortages in the emergency department.<sup>39 40</sup> The COVID-19 pandemic  
19  
20 has added to the heavy workload and the life-threatening emergencies that medical  
21  
22 staff, especially physicians and nurses, were facing, thereby aggravating the  
23  
24 psychological pressure; this is one of the neglected important reasons causing the high  
25  
26 levels of depression.<sup>41</sup> The prevalence rates of burnout, compassion satisfaction and  
27  
28 compassion fatigue in our study were much lower than those in nurses in a study  
29  
30 conducted in an adult emergency and urgent care department.<sup>8</sup> However, these  
31  
32 differences may be due to the small sample size (87 nurses), which consisted of  
33  
34 emergency nurses only in the Portuguese study. However, in this study, the results  
35  
36 indicated an average to high level of compassion fatigue and burnout among  
37  
38 emergency nurses, which was much higher than that of a previous study.<sup>42</sup>  
39  
40  
41  
42  
43  
44  
45  
46  
47  
48  
49

50 We found that compassion satisfaction, burnout and compassion fatigue had a  
51  
52 statistically significant correlation with depression. The current study shows that  
53  
54 compassion satisfaction has a significant positive correlation with depression and  
55  
56 compassion fatigue has a significant negative correlation with depression, which is  
57  
58  
59  
60

1  
2  
3  
4 not consistent with other recent studies. Jo et al. and Hegney et al. both found an  
5  
6 opposite association, that is, compassion satisfaction was negatively associated with  
7  
8 depression and compassion fatigue was positively correlated with depression.<sup>43 44</sup> The  
9  
10 reason for this may include differences in measurement tools. Interestingly, an  
11  
12 association analysis showed that burnout was significantly related to depression, a  
13  
14 finding similar to that of a survey of emergency physicians.<sup>45</sup>  
15  
16  
17  
18  
19

### 20 **Limitations of the current study**

21  
22 Our study has a few limitations. First, our study sample was drawn from a single  
23  
24 Chinese region with predominantly emergency physicians and nurses and adopted the  
25  
26 method of convenient sampling, which may have caused the uncommonly high scores  
27  
28 of depression and limits the generalisability of the findings to other professional  
29  
30 groups. Second, most of the instruments used in this research were based on the  
31  
32 respondents' self-reports, which is prone to information bias. Therefore, more robust  
33  
34 methods of assessment and better tools should be used in future studies. Third, the  
35  
36 causal association between compassion satisfaction, burnout, compassion fatigue and  
37  
38 depression is not clear, due to the cross-sectional study nature of our study. Hence, we  
39  
40 recommend that future research should examine the interaction between compassion  
41  
42 fatigue, burnout, compassion satisfaction and depression and evaluate their potential  
43  
44 impact rather than focusing on these phenomena separately. Lastly, compassion  
45  
46 fatigue, in our study, merely contributed to (did not cause) increase in depression.  
47  
48  
49  
50  
51  
52  
53  
54

### 55 **Conclusion**

56  
57  
58 The prevalence of depression among emergency physicians and nurses in the province  
59  
60

1  
2  
3  
4 of Sichuan was shown to be extremely high. Marital status and the presence of a  
5  
6 chronic disease among the staff affected their depression levels. We also examined  
7  
8 the relationship between compassion satisfaction, burnout, compassion fatigue and  
9  
10 depression among emergency physicians and nurses in Sichuan province and found a  
11  
12 significant association between these. Moreover, it was also determined that  
13  
14 independent variables, such as compassion satisfaction, burnout and compassion  
15  
16 fatigue strongly predict depression levels among emergency physicians and nurses.  
17  
18 Consequently, reducing the level of burnout and compassion fatigue and increasing  
19  
20 compassion satisfaction could be a key factor in addressing depression in emergency  
21  
22 department physicians and nurses. The findings of our study have the potential to  
23  
24 provide new directions and perspectives for future research. However, further studies  
25  
26 are needed to derive more specific details through in-depth interviews with physicians  
27  
28 and nurses to clarify the underlying causes of the high prevalence of depression  
29  
30 among emergency physicians and nurses.  
31  
32  
33  
34  
35  
36  
37  
38

### 39 40 **Acknowledgements**

41  
42 We would like to thank all emergency department physicians and nurses who  
43  
44 completed questionnaires for their unbiased participation; we gratefully acknowledge  
45  
46 the contributions by the hospital administrators of the five hospitals and thank them  
47  
48 for their efforts and time.  
49  
50  
51

### 52 53 **Contributors**

54  
55 HM wrote the manuscript and conducted the statistical analysis and interpretation;  
56  
57  
58 BW was in charge of the study concept and design; and SQH and YZ were in charge  
59  
60

of data acquisition. All authors revised and approved the final manuscript.

## **Funding**

No financial support was received to conduct this study.

## **Competing interests**

None declared.

## **Patient consent for publication**

Not required.

## **Ethics approval**

The study was approved by the Institutional Review Board of Xiangya Nursing School (Approval number E202062), Central South University, China.

## **Data availability statement**

Data are available upon reasonable request.

## **REFERENCES**

- 1 Johnston A, Abraham L, Greenslade J, et al. Review article: Staff perception of the emergency department working environment: Integrative review of the literature. *Emerg Med Australas* 2016;28(1):7-26.
- 2 Rasmus P, Marcinkowska W, Cieleban N, et al. Workload and coping with stress and the health status of emergency medical staff in the context of work-life balance. *Med Pr* 2020;71(5):587-93.
- 3 Elder EG, Johnston A, Wallis M, et al. Work-based strategies/interventions to ameliorate stressors and foster coping for clinical staff working in emergency departments: a scoping review of the literature. *Australas Emerg Care*

- 2020;23(3):181-92.
- 4 Sawe HR, Murray B, Jamieson J. Compassion fatigue in emergency providers: Experiences from Sub-Saharan Africa. *Emerg Med Australas* 2016 ;28(1):109-11.
- 5 Guillén-Astete C, Penedo-Alonso R, Gallego-Rodríguez P, et al. Levels of anxiety and depression among emergency physicians in Madrid during the SARS-CoV-2 pandemic. Niveles de ansiedad y depresión en médicos de urgencias de Madrid durante la pandemia por el virus SARS-CoV-2. *Emergencias*. 2020;32(5):369-371.
- 6 O'Callaghan EL, Lam L, Cant R, et al. Compassion satisfaction and compassion fatigue in Australian emergency nurses: A descriptive cross-sectional study. *Int Emerg Nurs* 2020; 48:100785.
- 7 Stehman CR, Testo Z, Gershaw RS, Kellogg AR. Burnout, Drop Out, Suicide: Physician Loss in Emergency Medicine, Part I. *West J Emerg Med*. 2019;20(3):485-494.
- 8 Borges EMDN, Fonseca CINDS, Baptista PCP, et al. Compassion fatigue among nurses working on an adult emergency and urgent care unit. *Rev Lat Am Enfermagem* 2019; 27: e3175.
- 9 Deering D. Compassion Fatigue: coping with secondary traumatic stress disorder in those who treat the traumatized. *Journal of Psychosocial Nursing & Mental Health Services* 1996;34(11):52.
- 10 Sorenson C, Bolick B, Wright K, et al. Understanding Compassion Fatigue in Healthcare Providers: A Review of Current Literature. *J Nurs Scholarsh* 2016;48(5):456-65.



- 1  
2  
3  
4 11 Chu LC. The Influence of Compassion Fatigue on Job Performance and  
5  
6 Organizational Citizenship Behaviors: The Moderating Effect of Person-Job Fit. *J*  
7  
8  
9 *Nurs Scholarsh* 2021;53(4):500-10.  
10  
11  
12 12 Hooper C, Craig J, Janvrin DR, Wetsel MA, Reimels E. Compassion satisfaction,  
13  
14 burnout, and compassion fatigue among emergency nurses compared with nurses  
15  
16 in other selected inpatient specialties. *J Emerg Nurs*. 2010;36(5):420-427.  
17  
18  
19 13 Barnett MD, Hays KN, Cantu C. Compassion fatigue, emotional labor, and  
20  
21 emotional display among hospice nurses. *Death Stud* 2019; 9:1-7.  
22  
23  
24 14 Maslach C, Schaufeli WB, Leiter MP. Job burnout. *Annu Rev Psychology*.  
25  
26 2001;52:397-422.  
27  
28  
29 15 Moukarzel A, Michelet P, Durand AC, et al. Burnout Syndrome among  
30  
31 Emergency Department Staff: Prevalence and Associated Factors. *Biomed Res Int*.  
32  
33 2019;2019:6462472.  
34  
35  
36 16 Ilić IM, Arandjelović MŽ, Jovanović JM, Nešić MM. Relationships of  
37  
38 work-related psychosocial risks, stress, individual factors and burnout -  
39  
40 Questionnaire survey among emergency physicians and nurses. Relationships of  
41  
42 work-related psychosocial risks, stress, individual factors and burnout -  
43  
44 Questionnaire survey among emergency physicians and nurses. *Med Pr*.  
45  
46 2017;68(2):167-178.  
47  
48  
49 17 Civita M, Laurita E, Di Stefano C, Gervasoni M, Viotti S, Zucchi S. Physicians  
50  
51 and nurses' burnout in the emergency departments of North West of Italy. *Intern*  
52  
53  
54  
55  
56  
57  
58  
59  
60 *Emerg Med*. 2021;16(5):1381-1385.

- 1  
2  
3  
4 18 Soltanifar A, Pishbin E, Attaran Mashhadi N, Najaf Najafi M, Siahtir M. Burnout  
5  
6 among female emergency medicine physicians: A nationwide study. *Emerg Med*  
7  
8 *Australas*. 2018;30(4):517-522.  
9  
10  
11  
12 19. Jyothindran R, d'Etienne JP, Marcum K, et al. Fulfillment, burnout and resilience  
13  
14 in emergency medicine-Correlations and effects on patient and provider outcomes.  
15  
16 *PLoS One*. 2020;15(10):e0240934.  
17  
18  
19  
20 20 Stamm B. The concise ProQOL manual. 2nd ed. Pocatello, ID: ProQOL.org. 2010.  
21  
22  
23 21 World Health Organization. Depression and other common mental disorders:  
24  
25 global health estimates, 2017. Available:  
26  
27 <https://www.who.int/publications/i/item/depression-global-health-estimates> [accessed  
28  
29 3 Jan 2017].  
30  
31  
32 22 J Priyadarshini. Depression-Let's Talk, 2017. Available:  
33  
34 [http://www.who.int/campaigns/world-health-day/2017/handouts-depression/what-y  
35  
36 ou-should-know-01.pdf?ua=1.pdf](http://www.who.int/campaigns/world-health-day/2017/handouts-depression/what-you-should-know-01.pdf?ua=1.pdf) [accessed 7 Apr 2017].  
37  
38  
39  
40 23 An Y, Yang Y, Wang A, et al. Prevalence of depression and its impact on quality  
41  
42 of life among frontline nurses in emergency departments during the COVID-19  
43  
44 outbreak. *J Affect Disord*. 2020;276:312-315.  
45  
46  
47  
48 24 Vasconcelos EM, Martino MMF, França SPS. Burnout and depressive symptoms  
49  
50 in intensive care nurses: relationship analysis. *Rev Bras Enferm*.  
51  
52 2018;71(1):135-141.  
53  
54  
55  
56 25 Crilly J, Greenslade J, Lincoln C, et al. Measuring the impact of the working  
57  
58 environment on emergency department nurses: A cross-sectional pilot study. *Int*  
59  
60

- 1  
2  
3  
4 Emerg Nurs 2017; 31:9-14.  
5  
6  
7 26 Radloff LS. The CES-D scale: a self-report depression scale for research in the  
8  
9 general population. *Appl Psychol Meas* 1977; 1:385-401.  
10  
11  
12 27 Das A, Sil A, Jaiswal S, et al. A Study to Evaluate Depression and Perceived  
13  
14 Stress Among Frontline Indian Doctors Combating the COVID-19 Pandemic. *Prim  
15  
16 Care Companion CNS Disord.* 2020;22(5):20m02716.  
17  
18  
19 28 Leong OS, Ghazali S, Hussin EOD, et al. Depression among older adults in  
20  
21 Malaysian daycare centres. *Br J Community Nurs* 2020;25(2):84-90.  
22  
23  
24 29 Xiao X, Zhu X, Fu S, et al. Psychological impact of healthcare workers in China  
25  
26 during COVID-19 pneumonia epidemic: A multi-center cross-sectional survey  
27  
28 investigation. *J Affect Disord* 2020; 274:405-410.  
29  
30  
31  
32 30 Wang Y, Wang P. Perceived stress and psychological distress among chinese  
33  
34 physicians: The mediating role of coping style. *Medicine (Baltimore)* 2019;98(23):  
35  
36 e15950.  
37  
38  
39  
40 31 Alva-Diaz C, Nieto-Gutierrez W, Taype-Rondan A, et al. Association between  
41  
42 daily working hours and depressive symptoms in resident physicians in Peru. *Rev  
43  
44 Colomb Psiquiatr (Engl Ed)* 2021;50(1):22-28.  
45  
46  
47  
48 32 Ogawa R, Seo E, Maeno T, et al. The relationship between long working hours and  
49  
50 depression among first-year residents in Japan. *BMC Med Educ* 2018;18(1):50.  
51  
52  
53 33 Marzouk M, Ouanes-Besbes L, Ouanes I, et al. Prevalence of anxiety and  
54  
55 depressive symptoms among medical residents in Tunisia: a cross-sectional survey.  
56  
57  
58 *BMJ Open* 2018;8(7): e020655.  
59  
60

- 1  
2  
3  
4 34 Sørensen JK, Pedersen AF, Bruun NH, et al. Alcohol and drug use among Danish  
5  
6 physicians. A nationwide cross-sectional study in 2014. *Dan Med J*.  
7  
8 2015;62(9):A5132.  
9  
10  
11 35 Silva MRG, Marcolan JF. Working conditions and depression in hospital  
12  
13 emergency service nurses. *Rev Bras Enferm*. 2020;73 Suppl1:e20180952.  
14  
15  
16 36 Tran TD, Hammarberg K, Kirkman M, et al. Alcohol use and mental health status  
17  
18 during the first months of COVID-19 pandemic in Australia. *J Affect Disord* 2020;  
19  
20 277:810-13.  
21  
22  
23 37 Ngasa SN, Sama CB, Dzekem BS, et al. Prevalence and factors associated with  
24  
25 depression among medical students in Cameroon: a cross-sectional study. *BMC*  
26  
27 *Psychiatry* 2017;17(1):216.  
28  
29  
30 38 Song X, Fu W, Liu X, et al. Mental health status of medical staff in emergency  
31  
32 departments during the Coronavirus disease 2019 epidemic in China. *Brain Behav*  
33  
34 *Immun*. 2020;88:60-65.  
35  
36  
37 39 Ruiz-Fernández MD, Ramos-Pichardo JD, Ibáñez-Masero O, Cabrera-Troya J,  
38  
39 Carmona-Rega MI, Ortega-Galán ÁM. Compassion fatigue, burnout, compassion  
40  
41 satisfaction and perceived stress in healthcare professionals during the COVID-19  
42  
43 health crisis in Spain. *J Clin Nurs*. 2020;29(21-22):4321-4330.  
44  
45  
46 40 Xu HG, Johnston ANB, Greenslade JH, et al. Stressors and coping strategies of  
47  
48 emergency department nurses and doctors: A cross-sectional study. *Australas*  
49  
50 *Emerg Care*. 2019;22(3):180-86.  
51  
52  
53 41 Lu W, Wang H, Lin Y, Li L. Psychological status of medical workforce during the  
54  
55  
56  
57  
58  
59  
60

1  
2  
3  
4 COVID-19 pandemic: A cross-sectional study. *Psychiatry Res.* 2020;288:112936.  
5

6  
7 42 Hunsaker S, Chen HC, Maughan D, Heaston S. Factors that influence the  
8  
9 development of compassion fatigue, burnout, and compassion satisfaction in  
10  
11 emergency department nurses. *J Nurs Scholarsh.* 2015;47(2):186-194.  
12  
13

14  
15 43 Jo M, Na H, Jung YE. Mediation Effects of Compassion Satisfaction and  
16  
17 Compassion Fatigue in the Relationships Between Resilience and Anxiety or  
18  
19 Depression Among Hospice Volunteers. *J Hosp Palliat Nurs* 2020;22(3):246-53.  
20  
21

22  
23 44 Hegney DG, Craigie M, Hemsworth D, et al. Compassion satisfaction, compassion  
24  
25 fatigue, anxiety, depression and stress in registered nurses in Australia: study 1  
26  
27 results. *J Nurs Manag* 2014;22(4):506-18.  
28  
29

30  
31 45 de Wit K. Burnout and depression among Canadian emergency physicians. *CJEM.*  
32  
33 2020 ;22(5): 559-560.  
34  
35  
36  
37  
38  
39  
40  
41  
42  
43  
44  
45  
46  
47  
48  
49  
50  
51  
52  
53  
54  
55  
56  
57  
58  
59  
60

**IJNS AUTHOR CHECKLIST** *Authors of all papers should submit this checklist together with their manuscript. The checklist will be made available during the submission process online to all authors and full step-by-step guidance given.*

*Part 1 identifies basic requirements for the manuscript submission (mandatory for all submissions)*

*Part 2 identifies recognized guidelines for scientific reporting, which you should use to prepare your manuscript (required for systematic reviews and original research)*

*Part 3 is a self assessment checklist that is designed to help to ensure that your research or review manuscript meets basic standards and the journal's Guide for Authors. (optional only)*

| <b>PART 1 Basic requirements</b>                                                       | <b>Author response or further detail</b>                                                                                                                                                                                                                                                                                                                                                          | <b>Tick</b>       |
|----------------------------------------------------------------------------------------|---------------------------------------------------------------------------------------------------------------------------------------------------------------------------------------------------------------------------------------------------------------------------------------------------------------------------------------------------------------------------------------------------|-------------------|
| Word count                                                                             | 4713                                                                                                                                                                                                                                                                                                                                                                                              |                   |
| Was ethical approval given and by whom? (give any reference number)                    | the Institutional Review Board of Xiangya Nursing School, Central South University (Approval number E202062)                                                                                                                                                                                                                                                                                      |                   |
| Please state any conflicts of interest                                                 | None                                                                                                                                                                                                                                                                                                                                                                                              |                   |
| Please state sources of funding and the role of funders in the conduct of the research | None                                                                                                                                                                                                                                                                                                                                                                                              |                   |
| Please state any study registry number (e.g. ISRCTN)                                   | Not applicable                                                                                                                                                                                                                                                                                                                                                                                    |                   |
| Title                                                                                  | The title is in the format 'Topic / question: design/type of paper' and identifies the population / care setting studied.<br>(e.g. <i>The effectiveness of telephone support for adolescents with insulin dependant diabetes: controlled before and after study: the structure is optional for discussion papers, editorials and commentaries</i> )                                               | Page1             |
| Abstract                                                                               | A structured abstract appropriate to the design (see <i>guidelines for authors</i> ). Reports of controlled trials should follow the CONSORT format (does not apply to editorials or commentaries, Abstracts for discussion papers need not be structured)                                                                                                                                        | Page1             |
| Key words                                                                              | Between four and ten key words have been provided in alphabetical order, which accurately identify the paper's subject, purpose, method and focus. Use the Medical Subject Headings (MeSH®) thesaurus or Cumulative Index to Nursing and Allied Health (CINAHL) headings where possible (see <a href="http://www.nlm.nih.gov/mesh/meshhome.html">http://www.nlm.nih.gov/mesh/meshhome.html</a> ). | Page2             |
| Highlights                                                                             | Bullet points have been included that identify existing research knowledge relating to the specific research question / topic (what is already known) and a summary of the new knowledge added by this study (what the paper adds) (see <i>Guide for Authors</i> , does not apply to editorials or commentaries)                                                                                  | Page2-<br>page3   |
| References                                                                             | Citations accord to the journal's format (Author, date) and reference list includes full details of all cited references in the proper format and alphabetical order (see <i>Guide for Authors</i> )                                                                                                                                                                                              | Page16-<br>page22 |
| Other Published accounts                                                               | All published and in press accounts of the study from which data in this paper originate are referred to in the paper and the relationship between this and other publications from the same study is made clear (see <i>Guide for Authors</i> )                                                                                                                                                  | Not applicable    |
|                                                                                        | The study is referred to by a distinctive name which will be used in any future publications to identify that it as the same study.                                                                                                                                                                                                                                                               | Not applicable    |
|                                                                                        | Please upload copies of all previous, current and under review publications from this study and / or give full details below                                                                                                                                                                                                                                                                      | Not applicable    |
| Authorship                                                                             | All authors and contributors sufficiently acknowledged as per Guide for Authors.                                                                                                                                                                                                                                                                                                                  | Page15            |

| <b>PART 2<br/>Standards of<br/>reporting</b>                   | <p>The editors require that manuscripts adhere to recognized reporting guidelines relevant to the research design used. These identify matters that should be addressed in your paper. Please indicate which guidelines you have referred to.</p> <p>These are not quality assessment frameworks and your study need not meet all the criteria implied in the reporting guideline to be worthy of publication in the IJNS. The checklists do identify essential matters that should be considered and reported upon. For example, a controlled trial may or may not be blinded but it is important that the paper identifies whether or not participants, clinicians and outcome assessors were aware of treatment assignments.</p> <p><b>**You are encouraged (although not required) to submit a checklist from the appropriate reporting guideline together with your paper as a guide to the editors and reviewers of your paper.</b></p> <p><i>Reporting guidelines endorsed by the IJNS are listed below:</i></p> | <b>Guideline referred to</b> | <b>Checklist submitted**</b> |
|----------------------------------------------------------------|-------------------------------------------------------------------------------------------------------------------------------------------------------------------------------------------------------------------------------------------------------------------------------------------------------------------------------------------------------------------------------------------------------------------------------------------------------------------------------------------------------------------------------------------------------------------------------------------------------------------------------------------------------------------------------------------------------------------------------------------------------------------------------------------------------------------------------------------------------------------------------------------------------------------------------------------------------------------------------------------------------------------------|------------------------------|------------------------------|
| Observational cohort, case control and cross sectional studies | STROBE <b>Strengthening the Reporting of Observational Studies in Epidemiology</b><br><a href="http://www.equator-network.org/index.aspx?o=1032">http://www.equator-network.org/index.aspx?o=1032</a>                                                                                                                                                                                                                                                                                                                                                                                                                                                                                                                                                                                                                                                                                                                                                                                                                   | √                            |                              |
| Quasi experimental / non-randomized evaluations                | TREND - Transparent Reporting of Evaluations with Non-randomized Designs<br><a href="http://www.equator-network.org/index.aspx?o=1032">http://www.equator-network.org/index.aspx?o=1032</a>                                                                                                                                                                                                                                                                                                                                                                                                                                                                                                                                                                                                                                                                                                                                                                                                                             |                              |                              |
| Randomised (and quasi-randomised) controlled trial             | CONSORT – Consolidated Standards of Reporting Trials<br><a href="http://www.equator-network.org/index.aspx?o=1032">http://www.equator-network.org/index.aspx?o=1032</a>                                                                                                                                                                                                                                                                                                                                                                                                                                                                                                                                                                                                                                                                                                                                                                                                                                                 |                              |                              |
| Study of Diagnostic accuracy / assessment scale                | STARD Standards for the Reporting of Diagnostic Accuracy studies<br><a href="http://www.equator-network.org/index.aspx?o=1032">http://www.equator-network.org/index.aspx?o=1032</a>                                                                                                                                                                                                                                                                                                                                                                                                                                                                                                                                                                                                                                                                                                                                                                                                                                     |                              |                              |
| Systematic Review of Controlled Trials                         | PRISMA - Preferred Reporting Items for Systematic Reviews and Meta-Analyses<br><a href="http://www.equator-network.org/index.aspx?o=1032">http://www.equator-network.org/index.aspx?o=1032</a>                                                                                                                                                                                                                                                                                                                                                                                                                                                                                                                                                                                                                                                                                                                                                                                                                          |                              |                              |
| Systematic Review of Observational Studies                     | MOOSE Meta-analysis of Observational Studies in Epidemiology<br><a href="http://www.equator-network.org/index.aspx?o=1032">http://www.equator-network.org/index.aspx?o=1032</a>                                                                                                                                                                                                                                                                                                                                                                                                                                                                                                                                                                                                                                                                                                                                                                                                                                         |                              |                              |
|                                                                | <i>Qualitative researchers might wish to consult the guideline listed below</i>                                                                                                                                                                                                                                                                                                                                                                                                                                                                                                                                                                                                                                                                                                                                                                                                                                                                                                                                         |                              |                              |
| Qualitative studies                                            | COREQ: Consolidated criteria for reporting qualitative research Tong, A., Sainsbury, P., Craig, J., 2007. Consolidated criteria for reporting qualitative research (COREQ): a 32-item checklist for interviews and focus groups. <i>International Journal for Quality in Health Care</i> 19 (6), 349-357. ( <a href="http://dx.doi.org/10.1093/intqhc/mzm042">http://dx.doi.org/10.1093/intqhc/mzm042</a> )                                                                                                                                                                                                                                                                                                                                                                                                                                                                                                                                                                                                             |                              |                              |
| Other (please give source)                                     |                                                                                                                                                                                                                                                                                                                                                                                                                                                                                                                                                                                                                                                                                                                                                                                                                                                                                                                                                                                                                         |                              |                              |
| Not applicable (please elaborate)                              |                                                                                                                                                                                                                                                                                                                                                                                                                                                                                                                                                                                                                                                                                                                                                                                                                                                                                                                                                                                                                         |                              |                              |

|               |                                                                                                                                                                                                                                                                                                                                                                                                                                                                                                                                                  |  |
|---------------|--------------------------------------------------------------------------------------------------------------------------------------------------------------------------------------------------------------------------------------------------------------------------------------------------------------------------------------------------------------------------------------------------------------------------------------------------------------------------------------------------------------------------------------------------|--|
| <b>PART 3</b> | <b>Part 3 Self-assessment checklist for research and reviews (optional)</b><br><br>You might like to review the content of your paper before submission to ensure that the essential elements are present. We do not intend that this checklist should dictate sub headings that you must use (although you might find it useful) but rather give a guide to content and issues that should (in general) always be considered. You might find it helpful to note the page number where some of the key issues are dealt with to assist reviewers |  |
|---------------|--------------------------------------------------------------------------------------------------------------------------------------------------------------------------------------------------------------------------------------------------------------------------------------------------------------------------------------------------------------------------------------------------------------------------------------------------------------------------------------------------------------------------------------------------|--|

| <b>Section</b>                          | <b>Descriptor</b>                                                                                                                                                                                                                                                                            | <b>TICK</b> |
|-----------------------------------------|----------------------------------------------------------------------------------------------------------------------------------------------------------------------------------------------------------------------------------------------------------------------------------------------|-------------|
| <b>a) Primary research only</b>         |                                                                                                                                                                                                                                                                                              |             |
| Background                              | A statement of the problem / phenomena of interest, a brief summary of existing research which addresses the topic and an explanation of the purpose of the current study / review in relation to this.                                                                                      | Page3       |
| <b>METHODS</b>                          | Clear statement of the aims, objectives (hypothesis) and research design                                                                                                                                                                                                                     | Page5       |
| Settings                                | The settings and locations where the study took place                                                                                                                                                                                                                                        | Page5       |
| Inclusion Criteria                      | Eligibility criteria for participants – inclusion and exclusion criteria                                                                                                                                                                                                                     | Page5       |
| Sampling                                | Method of sampling and if relevant allocation to groups (e.g. convenience, random) and <i>description</i> of sampling, recruitment and allocation procedures .                                                                                                                               | Page5       |
| Sample size                             | How sample size was determined.                                                                                                                                                                                                                                                              | Page6       |
| Outcomes and data collection procedures | Clearly defined primary and secondary outcome measures (when applicable), Setting and methods of data collection and methods used to enhance the quality of data collection (e.g., multiple observations, training of assessors).                                                            | Page6       |
| Analysis Methods                        | Statistical methods used / approaches to qualitative analysis including procedures to ensure accuracy / validity / truthfulness of accounts.                                                                                                                                                 | Page7       |
| Ethical review*                         | Details of ethical scrutiny / approvals obtained.                                                                                                                                                                                                                                            | Page16      |
| <b>RESULTS</b><br>Participant flow      | Flow of participants through each stage of selection, allocation, follow up / inclusion in analysis (a diagram is strongly recommended). Describe protocol deviations from study as planned, together with reasons.                                                                          | N/A         |
| Recruitment                             | Dates defining the periods of recruitment and follow-up.                                                                                                                                                                                                                                     | N/A         |
| Baseline data                           | Baseline demographic and clinical characteristics of each group.                                                                                                                                                                                                                             | N/A         |
| Results                                 | Point estimates, exact p-values and confidence intervals for quantitative studies. Qualitative analyses are supported by appropriate quotations which support the derived themes / categories and which are anonymously attributed to participants (using pseudonyms, numbers or equivalent) | Page8       |
| <b>DISCUSSION</b>                       | Brief recapitulation / summary of the results taking into account study hypotheses / aims                                                                                                                                                                                                    | Page11      |
| Interpretation                          | Interpretation of the results, taking into account study limitations                                                                                                                                                                                                                         | Page14      |
| Overall evidence                        | Assessment of the current state of knowledge in the context of study results and other evidence.                                                                                                                                                                                             | Page14      |
| Implications                            | Consideration of the implications of the current state of knowledge for further research and or practice                                                                                                                                                                                     | Page15      |



# BMJ Open

## Compassion fatigue, burnout, compassion satisfaction and depression among emergency department physicians and nurses: a cross-sectional study

|                                 |                                                                                                                                                                                                                                                                                                                                         |
|---------------------------------|-----------------------------------------------------------------------------------------------------------------------------------------------------------------------------------------------------------------------------------------------------------------------------------------------------------------------------------------|
| Journal:                        | <i>BMJ Open</i>                                                                                                                                                                                                                                                                                                                         |
| Manuscript ID                   | bmjopen-2021-055941.R3                                                                                                                                                                                                                                                                                                                  |
| Article Type:                   | Original research                                                                                                                                                                                                                                                                                                                       |
| Date Submitted by the Author:   | 24-Mar-2022                                                                                                                                                                                                                                                                                                                             |
| Complete List of Authors:       | Ma, Huan; Sichuan Vocational College of Health and Rehabilitation, nursing department<br>Huang, Shuang; The people's hospital of Neijiang Dongxing District, Emergency Department<br>We, Bo; The people's hospital of Neijiang Dongxing District, Emergency Department<br>Zhong, Ying; Central South University, Xiangya Nursing School |
| <b>Primary Subject Heading</b>: | Mental health                                                                                                                                                                                                                                                                                                                           |
| Secondary Subject Heading:      | Mental health, Emergency medicine, Public health                                                                                                                                                                                                                                                                                        |
| Keywords:                       | Adult psychiatry < PSYCHIATRY, PUBLIC HEALTH, MENTAL HEALTH, Depression & mood disorders < PSYCHIATRY                                                                                                                                                                                                                                   |
|                                 |                                                                                                                                                                                                                                                                                                                                         |

SCHOLARONE™  
Manuscripts



I, the Submitting Author has the right to grant and does grant on behalf of all authors of the Work (as defined in the below author licence), an exclusive licence and/or a non-exclusive licence for contributions from authors who are: i) UK Crown employees; ii) where BMJ has agreed a CC-BY licence shall apply, and/or iii) in accordance with the terms applicable for US Federal Government officers or employees acting as part of their official duties; on a worldwide, perpetual, irrevocable, royalty-free basis to BMJ Publishing Group Ltd ("BMJ") its licensees and where the relevant Journal is co-owned by BMJ to the co-owners of the Journal, to publish the Work in this journal and any other BMJ products and to exploit all rights, as set out in our [licence](#).

The Submitting Author accepts and understands that any supply made under these terms is made by BMJ to the Submitting Author unless you are acting as an employee on behalf of your employer or a postgraduate student of an affiliated institution which is paying any applicable article publishing charge ("APC") for Open Access articles. Where the Submitting Author wishes to make the Work available on an Open Access basis (and intends to pay the relevant APC), the terms of reuse of such Open Access shall be governed by a Creative Commons licence – details of these licences and which [Creative Commons](#) licence will apply to this Work are set out in our licence referred to above.

Other than as permitted in any relevant BMJ Author's Self Archiving Policies, I confirm this Work has not been accepted for publication elsewhere, is not being considered for publication elsewhere and does not duplicate material already published. I confirm all authors consent to publication of this Work and authorise the granting of this licence.

# Compassion fatigue, burnout, compassion satisfaction and depression among emergency department physicians and nurses: a cross-sectional study

Huan Ma<sup>1</sup>, Shuang-quan Huang<sup>2</sup>, Bo We<sup>2</sup>, Ying Zhong<sup>3</sup>

<sup>1</sup>Sichuan Vocational College of Health and Rehabilitation, Zigong, Sichuan, China

<sup>2</sup>Emergency Department, The people's hospital of Neijiang Dongxing District, Neijiang, Sichuan, China

<sup>3</sup>Xiangya Nursing School, Central South University, Changsha, Hunan, China

**Corresponding author:**

Correspondence should be addressed to: Bo We, Emergency Department, The people's hospital of Neijiang Dongxing District, Neijiang, Sichuan, China. email: cswzy2017@163.com

## Abstract

**Objectives:** Emergency department physicians and nurses are at high risk of compassion fatigue, burnout and depression. The purpose of this study was to examine the interrelationship between compassion fatigue, burnout, compassion satisfaction and depression in emergency department physicians and nurses.

**Design:** A cross-sectional study.

**Setting:** This study was conducted in five tertiary hospitals in five different cities across the province of Sichuan, China, in 2021.

**Participants:** A total of 342 emergency department physicians and nurses participated in the study.

**Main outcome measures:** Compassion fatigue, burnout, compassion satisfaction and depression scores.

**Results:** Among the study participants, 100% were found to have depressive

1  
2  
3  
4 symptoms, 27.8% had low compassion satisfaction, 2.3% had high burnout and 3.8%  
5  
6 had compassion fatigue. In the final multiple linear regression model, marital status  
7  
8 ( $p=0.008$ ; 95% confidence interval [CI],  $-5.205$  to  $-0.789$ ), history of chronic disease  
9  
10 ( $p=0.003$ ; 95% CI,  $-6.461$  to  $-1.386$ ), compassion satisfaction ( $p<0.001$ ; 95% CI,  
11  
12  $0.593$  to  $1.274$ ), burnout ( $p=0.019$ ; 95% CI,  $0.084$  to  $0.930$ ) and compassion fatigue  
13  
14 ( $p<0.001$ ; 95% CI,  $-1.527$  to  $-1.053$ ) among emergency department physicians and  
15  
16 nurses were considered to be significant predictors of depression.  
17  
18  
19  
20  
21

22 **Conclusions:** The prevalence of depression among emergency department physicians  
23  
24 and nurses is high in the province of Sichuan, China. Compassion fatigue, burnout  
25  
26 and compassion satisfaction were significantly associated with depression in  
27  
28 emergency department physicians and nurses. Hospital administrations should  
29  
30 consider these findings to develop appropriate psychological interventions and  
31  
32 strategies, to prevent, alleviate or treat severe depression among emergency  
33  
34 department physicians and nurses in the province of Sichuan.  
35  
36  
37  
38  
39

40 **Keywords:** Compassion fatigue, burnout, compassion satisfaction, depression,  
41  
42 emergency department  
43  
44

### 45 **Strengths and limitations of this study**

46  
47  
48 •This is a novel study conducted in the province of Sichuan, China, which describes  
49  
50 the prevalence of compassion fatigue, burnout, compassion satisfaction and  
51  
52 depression and the influencing factors associated with depression among emergency  
53  
54 department physicians and nurses.  
55  
56

57  
58 •The causal association between compassion fatigue, burnout, compassion satisfaction  
59  
60

1  
2  
3  
4 and depression could not be established since this was a cross-sectional study.  
5

6 •Data on compassion fatigue, burnout, compassion satisfaction and depression were  
7  
8 collected based on the participants' self-reports, which may have led to information  
9  
10 bias.  
11  
12

### 13 14 **Introduction**

15  
16 Emergency departments are fast-paced, high-pressure environments in which the  
17  
18 medical staff encounter heavy workloads, violence, interpersonal conflict, high  
19  
20 patient load, mass casualty incidents; moreover, limited resources and poor skill mix  
21  
22 compound the problem.<sup>1 2</sup> Emergency department physicians and nurses who are at  
23  
24 the frontline of a demanding health care system take significant responsibility for the  
25  
26 care of emergency patients, regardless of overstretched and overburdened resources.<sup>3</sup>  
27  
28 Emergency physicians and nurses who witness alarming morbidity and mortality on a  
29  
30 daily basis, can experience adverse physical and mental health problems, such as  
31  
32 compassion fatigue, depression and burnout.<sup>4</sup> It has been reported that compassion  
33  
34 fatigue, burnout and depression afflicting emergency physicians and nurses can not  
35  
36 only harm individual mental health, but can also cause a series of fateful  
37  
38 consequences, including medical errors, poor-quality patient care and increased  
39  
40 patient mortality during hospital stay.<sup>5-7</sup>  
41  
42  
43  
44  
45  
46  
47  
48  
49

50  
51 Compassion fatigue, which is considered as an occupational hazard in healthcare,  
52  
53 is conceptualized as “the natural, consequent behaviors and emotions resulting from  
54  
55 knowing about a traumatizing event experienced by a significant other – the stress  
56  
57 resulting from helping or wanting to help a traumatized or suffering person”.<sup>8 9</sup>  
58  
59  
60

1  
2  
3  
4 Compassion fatigue can result in a series of physical, mental and work-related  
5  
6 symptoms that seriously affect quality of patient care and staff-patient relationships.<sup>10</sup>  
7  
8  
9 Chu reported that compassion fatigue has a significant adverse effect on job  
10  
11 performance and organizational citizenship behavior.<sup>11</sup> A study conducted in the U.S.  
12  
13 indicated that about 80% of emergency nurses had moderate to high levels of  
14  
15 compassion fatigue.<sup>12</sup> Barnett et al. noted that compassion fatigue was positively  
16  
17 associated with emotional display.<sup>13</sup> Burnout is a work-related syndrome and  
18  
19 predominantly defined as “high emotional exhaustion, depersonalization and a low  
20  
21 level of personal accomplishment”.<sup>14</sup> The prevalence of burnout among emergency  
22  
23 medical staff was very high and burnout can cause serious consequences.<sup>15-17</sup>  
24  
25 Moukarzel et al. noted that 34.6% emergency medical staff had severe burnout and  
26  
27 Soltanifar et al. found that 84.5% emergency physicians had experienced high  
28  
29 emotional exhaustion.<sup>15 18</sup> Jyothindran’s findings indicated that severe burnout was  
30  
31 highly correlated with medical error and turnover.<sup>19</sup> Compassion satisfaction is  
32  
33 defined as the emotions generated and the sense of achievement derived from helping  
34  
35 and caring for patients, whether related to direct assistance or support in improvement  
36  
37 of patients’ condition.<sup>20</sup>

38  
39  
40  
41  
42  
43  
44  
45  
46  
47  
48 Depression, a common and serious mental illness, is listed by the World Health  
49  
50 Organization (WHO) as one of the most important factors contributing to global  
51  
52 disability and the main contributor to suicide deaths at all ages.<sup>21</sup> The most common  
53  
54 symptoms associated with depression are persistent sadness, a loss of interest and  
55  
56 energy, insomnia, headache, unexplained pain, gastrointestinal symptoms,  
57  
58  
59  
60

1  
2  
3  
4 hopelessness and thoughts of self-harm or suicide.<sup>22</sup> Severe depression can lead to  
5  
6 many negative outcomes. For example, a recent study on emergency department  
7  
8 nurses during the COVID-19 pandemic in China showed that depression had an  
9  
10 adverse effect on quality of patient care and nurses' quality of life.<sup>23</sup> Vasconcelos et al.  
11  
12 found that depressive symptoms were significantly associated with burnout.<sup>24</sup>  
13  
14  
15  
16  
17 Emergency medical staff are exposed to all kinds of stress every day.<sup>25</sup> Hence, special  
18  
19 attention should be paid to the psychological status of emergency physicians and  
20  
21  
22  
23  
24  
25  
26  
27  
28  
29  
30  
31  
32  
33  
34  
35  
36  
37  
38  
39  
40  
41  
42  
43  
44  
45  
46  
47  
48  
49  
50  
51  
52  
53  
54  
55  
56  
57  
58  
59  
60

nurses.

Although extensive studies on depression have been conducted, most of the  
studies have only focused on nurses.<sup>23 24</sup> Moreover, few studies have been carried out  
to explore the factors that influence the development of depression in emergency  
physicians and nurses.<sup>5 25</sup> Considering that emergency physicians and nurses have  
emotionally demanding tasks and work in high-pressure situations, the aim of this  
study was to determine the prevalence of compassion fatigue, burnout, compassion  
satisfaction and depression and explore the interrelationship of these among this  
highly vulnerable population.

## Methods

### Study design and participants

A cross-sectional survey was conducted among emergency physicians and nurses  
across five different cities of Sichuan province, China. A convenience sample was  
used to recruit physicians and registered nurses working in the emergency department.

The eligibility criteria were as follows: (1) being licensed physicians and registered

1  
2  
3  
4 nurses; (2) with more than one year's work experience; (3) working in emergency  
5  
6 department; (4) provided consent to participate. The data were collected by five  
7  
8 trained research assistants from January to February 2021. A set of questionnaires was  
9  
10 distributed to all emergency medical staff by the five tertiary hospitals' administration.  
11  
12 All the participants were informed that their participation was voluntary and that their  
13  
14 data would be anonymised. A total of 350 emergency physicians and nurses filled in  
15  
16 the questionnaires, out of which 342 questionnaires were returned (an effective  
17  
18 response rate of 97.7%).  
19  
20  
21  
22  
23

### 24 25 **Measurements**

26  
27 The questionnaire comprised three instruments: a demographic survey, the  
28  
29 Professional Quality of Life (ProQOLv5) scale and the Center for Epidemiologic  
30  
31 Studies Depression (CES-D) scale. Sociodemographic data were collected with a  
32  
33 self-designed questionnaire, including position (physician, nurse), age (less than 35  
34  
35 years, 35 years or older), gender (male, female), marital status (married, unmarried),  
36  
37 education level (diploma, associate degree, bachelor's degree, master's degree or  
38  
39 higher), professional title (primary, intermediate, senior), work experience (less than 5  
40  
41 years, 5–10 years, over 10 years), weekly night shifts (none, 1–2, 3–4, more than 4),  
42  
43 daily work hours (less than 9 h, 9–12 h, over 12 h), cigarette use (yes, no), alcohol use  
44  
45 (yes, no) and history of chronic disease (yes, no). According to the level of experience  
46  
47 of the professionals, physicians and nurses' professional ranks in China were divided  
48  
49 into three categories, including primary titles (physicians, nurses, nurse practitioners),  
50  
51 intermediate titles (physicians in charge of a case, nurses-in-charge) and senior titles  
52  
53  
54  
55  
56  
57  
58  
59  
60



1  
2  
3  
4 (assistant director physicians, director physicians, assistant director nurses, director  
5  
6  
7 nurses).

### 9 **Professional quality of life scale**

10  
11  
12 Compassion fatigue, burnout and compassion satisfaction levels were assessed using  
13  
14 the ProQOLv5. The questionnaire includes 30 items with a Likert scale of 5 points  
15  
16 (1=never; 5=always), 10 items for compassion satisfaction, 10 items for burnout and  
17  
18 10 items for compassion fatigue.<sup>20</sup> The level of compassion satisfaction was divided  
19  
20 into less than 22 (low), 23–41 (middle) and more than 42 (high). For compassion  
21  
22 fatigue and burnout, a score of 22 or less represents low levels, 23–41 represents  
23  
24 middle levels, and a score of more than 42 high levels. The alpha reliability  
25  
26 coefficients for compassion satisfaction, burnout and compassion fatigue were 0.775,  
27  
28 0.775 and 0.807, respectively.  
29  
30  
31  
32  
33  
34

### 35 **Depression**

36  
37  
38 The CES-D is a 20-item questionnaire intended to measure the frequency of  
39  
40 occurrence of symptoms of depression over the past week using a 5-point Likert scale  
41  
42 (each item was scored as follows: 0=rarely or none of the time to 3=most or all of the  
43  
44 time; total score range, 0–60).<sup>26</sup> The CES-D scale has four reverse-scored items (items  
45  
46 4, 8, 12 and 16) and covers four major symptoms of depression, including (1)  
47  
48 depressed affect (e.g. sadness, crying); (2) absence of positive affect (e.g. hope,  
49  
50 enjoyment); (3) somatic symptoms (e.g., appetite problems, problems “getting  
51  
52 going”); and (4) interpersonal relations (e.g. perceiving others as unfriendly).  
53  
54  
55  
56  
57  
58 Standard cut-off value  $\geq 16$  indicates the likely presence of depression. The  
59  
60

1  
2  
3  
4 Cronbach's  $\alpha$  in the current study was 0.916.  
5

### 6 **Statistical analysis**

7  
8  
9 Statistical analysis was conducted using SPSS version 22.0 (SPSS Inc., Chicago, IL,  
10 USA). Continuous variables were summarized as mean with standard deviation (SD),  
11 while categorical variables were presented as frequencies and percentages.  
12  
13  
14 Independent samples t-test, and one-way analysis of variance (ANOVA) were used to  
15 compare participants' depression by demographic characteristics. Associations  
16 between compassion satisfaction, burnout, compassion fatigue and depression among  
17 emergency physicians and nurses were analysed using Pearson's correlation analysis.  
18  
19 A multiple linear regression model was used to estimate the effect of compassion  
20 satisfaction, burnout, compassion fatigue and other demographic variables on  
21 depression. A *p* value of less than 0.05 was considered statistically significant  
22 (two-tailed).  
23  
24  
25  
26  
27  
28  
29  
30  
31  
32  
33  
34  
35  
36  
37

### 38 **Patient and public involvement**

39  
40 Patients or members of the public were not involved in the design, reporting or  
41 dissemination plans of our research.  
42  
43  
44  
45  
46

### 47 **Results**

48  
49 The participants' baseline characteristics are shown in Table 1. The mean age was  
50 32.59 years (SD, 8.19; age range, 20–58 years). Most participants were female  
51 (70.5%), nurses (71.1%), married (68.7.0%), held a bachelor degree (62.9%) and had  
52 a primary professional title (57.0%).  
53  
54  
55  
56  
57  
58  
59

60 The differences in depression scores according to the characteristics of

emergency physicians and nurses are also presented in Table 1. There were significant differences in depression scores based on marital status ( $p<0.01$ ), professional title ( $p<0.05$ ), daily work hours ( $p<0.05$ ), alcohol use ( $p<0.05$ ) and history of chronic disease ( $p<0.01$ ).

**Table 1. Demographic characteristics of emergency department physicians and nurses (N=342).**

| Variables               | N (%)      | Depression Mean (SD) |
|-------------------------|------------|----------------------|
| Position                |            | $P=0.181$            |
| Physician               | 99 (28.9)  | 38.60 (11.76)        |
| Nurse                   | 243 (71.1) | 36.86 (10.52)        |
| Age (years)             |            | $P=0.991$            |
| <35                     | 236 (69.0) | 37.37 (10.23)        |
| $\geq 35$               | 106 (31.0) | 37.35 (12.32)        |
| Gender                  |            | $P=0.162$            |
| Male                    | 101 (29.5) | 38.64 (12.22)        |
| Female                  | 241 (70.5) | 36.83 (10.28)        |
| Marital status          |            | $P=0.002$            |
| Unmarried               | 107 (31.3) | 40.01(11.05)         |
| Married                 | 235 (68.7) | 36.16(10.64)         |
| Education level         |            | $P=0.071$            |
| Associate degree        | 102 (29.8) | 36.16 (9.97)         |
| Bachelor degree         | 215 (62.9) | 38.33 (11.49)        |
| Master degree           | 25 (7.3)   | 34.00 (8.24)         |
| Profession title        |            | $P=0.034$            |
| Primary                 | 195 (57.0) | 37.57 (10.56)        |
| Intermediate            | 108 (31.6) | 38.48 (11.51)        |
| Senior                  | 39 (11.4)  | 33.25 (10.18)        |
| Work experience (years) |            | $P=0.810$            |
| <5                      | 94 (27.5)  | 37.48 (10.09)        |
| 5-10                    | 95 (27.8)  | 37.88 (10.96)        |
| >10                     | 153 (44.7) | 36.97 (11.39)        |
| Weekly night shifts     |            | $P=0.063$            |
| 0                       | 46 (13.5)  | 33.60 (9.35)         |
| 1-2                     | 148 (43.4) | 37.89 (11.19)        |
| 3-4                     | 106 (31.0) | 37.46 (11.10)        |
| >4                      | 42 (12.3)  | 39.40 (10.35)        |
| Daily work hours(h)     |            | $P=0.017$            |
| <9                      | 161 (47.1) | 35.60 (10.29)        |
| 9-12                    | 118 (34.5) | 39.19 (11.13)        |

|                            |            |                 |
|----------------------------|------------|-----------------|
| >12                        | 163 (18.4) | 38.44 (11.45)   |
| Cigarette use              |            | <i>P</i> =0.244 |
| Yes                        | 38 (11.1)  | 39.31 (12.13)   |
| No                         | 304 (88.9) | 37.12 (10.74)   |
| Alcohol use                |            | <i>P</i> =0.019 |
| Yes                        | 50 (14.6)  | 40.70 (10.91)   |
| No                         | 292 (85.4) | 36.79 (10.82)   |
| History of chronic disease |            | <i>P</i> =0.001 |
| Yes                        | 58 (17.0)  | 41.79 (12.21)   |
| No                         | 284 (83.0) | 36.46 (10.41)   |

As depicted in Table 2, compassion satisfaction levels were moderate in approximately 70.8% of emergency physicians and nurses, low in 27.8% of them and high in 1.4%. Of the participants, 2.3% had a high burnout score, 66 (19.3%) had a low burnout score and 3% of the respondents had a high compassion fatigue score. The mean scores for depression, compassion satisfaction, burnout and compassion fatigue were 37.36 (SD, 10.91), 26.70 (SD, 6.36), 27.74 (SD, 6.19) and 30.19 (SD, 6.59), respectively.

**Table 2. Compassion satisfaction, burnout, compassion fatigue and depression levels among emergency physicians and nurses (N=342).**

| Dimensions              | N (%)      | Mean  | SD    |
|-------------------------|------------|-------|-------|
| Depression              |            | 37.36 | 10.91 |
| Compassion satisfaction |            | 26.70 | 6.36  |
| Low                     | 95 (27.8)  | -     | -     |
| Medium                  | 242 (70.8) | -     | -     |
| High                    | 5 (1.4)    | -     | -     |
| Burnout                 |            | 27.74 | 6.19  |
| Low                     | 66 (19.3)  | -     | -     |
| Medium                  | 268 (78.4) | -     | -     |
| High                    | 8 (2.3)    | -     | -     |
| Compassion fatigue      |            | 30.19 | 6.59  |
| Low                     | 43 (12.6)  | -     | -     |
| Medium                  | 286 (83.6) | -     | -     |
| High                    | 13 (3.8)   | -     | -     |

Both compassion satisfaction and burnout were significantly correlated with three depression metrics: depressed affect, somatic symptoms and inter-personal

relations. Apart from positive affect, there was no relationship between the other sub-scales of depression and compassion fatigue (Table 3).

**Table 3. Correlation between dimensions of compassion satisfaction, burnout, compassion fatigue and depression (N=342).**

|                         | Depression | Depressed Affect | Somatic | Positive Affect | Inter-personal |
|-------------------------|------------|------------------|---------|-----------------|----------------|
| Compassion satisfaction | 0.282**    | 0.319**          | 0.317** | 0.003           | 0.311**        |
| Burnout                 | 0.171**    | 0.214**          | 0.239** | -0.163**        | 0.247**        |
| Compassion fatigue      | -0.178**   | -0.092           | -0.021  | -0.430**        | 0.001          |

Note:\*\* $p < 0.01$

Depression was computed as outcome variable, and the independent variables comprised the demographic characteristics and the three dimensions of compassion fatigue. Table 4 shows that marital status, history of chronic disease, compassion satisfaction, burnout and compassion fatigue collectively accounted for 39.6% of the variance in depression ( $F = 28.952$ ,  $p < 0.001$ ,  $R^2 = 0.410$ , adjusted  $R^2 = 0.396$ ).

**Table 4. Multiple linear regression analysis of depression (N=342).**

| Dependent variables | Independent variables      | Unstandardised coefficient |       | Standardised coefficient |          | <i>P</i> | 95% CI      |             |
|---------------------|----------------------------|----------------------------|-------|--------------------------|----------|----------|-------------|-------------|
|                     |                            | B                          | SE    | Beta                     | <i>t</i> |          | Lower bound | Upper bound |
| Depression          | Marital status             | -2.997                     | 1.123 | -0.128                   | -2.670   | 0.008    | -5.205      | -0.789      |
|                     | History of chronic disease | -3.924                     | 1.290 | -0.135                   | -3.052   | 0.003    | -6.461      | -1.386      |
|                     | Compassion satisfaction    | 0.934                      | 0.173 | 0.545                    | 5.388    | <0.001   | 0.593       | 1.274       |
|                     | Burnout                    | 0.507                      | 0.215 | 0.288                    | 2.359    | 0.019    | 0.084       | 0.930       |
|                     | Compassion fatigue         | -1.290                     | 0.120 | -0.779                   | -10.707  | <0.001   | -1.527      | -1.053      |

## Discussion

1  
2  
3  
4 The findings of the current study regarding the frequency and distribution of  
5  
6 depression among emergency physicians and nurses show that the following  
7  
8 characteristics were significantly associated with higher levels of depression—marital  
9  
10 status: unmarried; intermediate professional title; consumption of alcohol; daily  
11  
12 worktime between 9 and 12 h; and a history of chronic disease. Similar to our study, a  
13  
14 statistically significant difference was observed in the levels of depression among  
15  
16 frontline doctors combating the COVID-19 pandemic in India with regard to marital  
17  
18 status.<sup>27</sup> One reason for this could be that spousal support is beneficial for maintaining  
19  
20 good mental health.<sup>28</sup> Our findings concur with those of Xiao et al. who found that  
21  
22 depression levels were different among different professional titles and that an  
23  
24 intermediate title was an independent influencing factor.<sup>29</sup> This could be explained by  
25  
26 the fact that compared to medical staff with an intermediate title, physicians and  
27  
28 nurses with a senior title have a richer work experience, a higher income and a lower  
29  
30 family burden.<sup>30</sup> The findings of this study are in accordance with those of two  
31  
32 previous studies that reported that working excessively long hours on a daily basis  
33  
34 was significantly associated with the frequency of depressive symptoms.<sup>31 32</sup>  
35  
36 Emergency physicians and nurses endure a heavy burden of work imposed on them  
37  
38 on a daily basis and most often without a day of safety rest. Work overload and  
39  
40 chronic sleep deprivation can increase the risk for depression.<sup>33</sup> A study conducted by  
41  
42 Sørensen et al. among 1,943 Danish physicians noted that the emergency department  
43  
44 had the highest proportion of risky alcohol use.<sup>34</sup> Besides, the study of Silva et al.  
45  
46 reported that the prevalence of depressive symptoms among emergency nurses in  
47  
48  
49  
50  
51  
52  
53  
54  
55  
56  
57  
58  
59  
60

1  
2  
3  
4 Brazil is 95.24%.<sup>35</sup> Emergency physicians and nurses who had severe depressive  
5  
6 symptoms were more likely to be drinking alcohol to regulate these emotional  
7  
8 states.<sup>36</sup> Our results are also similar to those reported in a study by Ngasa et al. that  
9  
10 found that the presence of a chronic disease was independently associated with  
11  
12 depression.<sup>37</sup>  
13  
14  
15  
16  
17

18 Our study found a considerably high prevalence of depressive symptoms among  
19  
20 emergency physicians and nurses, and the prevalence of depressive symptoms  
21  
22 reached up to 100%, which is much higher than the previous study.<sup>38</sup> The high level of  
23  
24 depression may be associated with factors, such as excessive workload, overcrowding  
25  
26 and resource shortages in the emergency department.<sup>39 40</sup> The COVID-19 pandemic  
27  
28 has added to the heavy workload and the life-threatening emergencies that medical  
29  
30 staff, especially physicians and nurses, were facing, thereby aggravating the  
31  
32 psychological pressure; this is one of the neglected important reasons causing the high  
33  
34 levels of depression.<sup>41</sup> The prevalence rates of burnout, compassion satisfaction and  
35  
36 compassion fatigue in our study were much lower than those in nurses in a study  
37  
38 conducted in an adult emergency and urgent care department.<sup>8</sup> However, these  
39  
40 differences may be due to the small sample size (87 nurses), which consisted of  
41  
42 emergency nurses only in the Portuguese study. However, in this study, the results  
43  
44 indicated an average to high level of compassion fatigue and burnout among  
45  
46 emergency nurses, which was much higher than that of a previous study.<sup>42</sup>  
47  
48  
49  
50  
51  
52  
53  
54  
55  
56  
57

58 We found that compassion satisfaction, burnout and compassion fatigue had a  
59  
60

1  
2  
3  
4 statistically significant correlation with depression. The current study shows that  
5  
6 compassion satisfaction has a significant positive correlation with depression and  
7  
8  
9 compassion fatigue has a significant negative correlation with depression, which is  
10  
11 not consistent with other recent studies. Jo et al. and Hegney et al. both found an  
12  
13 opposite association, that is, compassion satisfaction was negatively associated with  
14  
15 depression and compassion fatigue was positively correlated with depression.<sup>43 44</sup> The  
16  
17 reason for this may include differences in measurement tools. Interestingly, an  
18  
19 association analysis showed that burnout was significantly related to depression, a  
20  
21 finding similar to that of a survey of emergency physicians.<sup>45</sup>  
22  
23  
24  
25  
26  
27

### 28 **Limitations of the current study**

29  
30 Our study has a few limitations. First, our study sample was drawn from a single  
31  
32 Chinese region with predominantly emergency physicians and nurses and adopted the  
33  
34 method of convenient sampling, which may have caused the uncommonly high scores  
35  
36 of depression and limits the generalisability of the findings to other professional  
37  
38 groups. Second, most of the instruments used in this research were based on the  
39  
40 respondents' self-reports, which is prone to information bias. Therefore, more robust  
41  
42 methods of assessment and better tools should be used in future studies. Third, the  
43  
44 causal association between compassion satisfaction, burnout, compassion fatigue and  
45  
46 depression is not clear, due to the cross-sectional study nature of our study. Hence, we  
47  
48 recommend that future research should examine the interaction between compassion  
49  
50 fatigue, burnout, compassion satisfaction and depression and evaluate their potential  
51  
52 impact rather than focusing on these phenomena separately. Lastly, compassion  
53  
54  
55  
56  
57  
58  
59  
60



1  
2  
3  
4 fatigue, in our study, merely contributed to (did not cause) increase in depression.  
5

## 6 **Conclusion**

7  
8  
9 The prevalence of depression among emergency physicians and nurses in the province  
10  
11 of Sichuan was shown to be extremely high. Marital status and the presence of a  
12  
13 chronic disease among the staff affected their depression levels. We also examined  
14  
15 the relationship between compassion satisfaction, burnout, compassion fatigue and  
16  
17 depression among emergency physicians and nurses in Sichuan province and found a  
18  
19 significant association between these. Moreover, it was also determined that  
20  
21 independent variables, such as compassion satisfaction, burnout and compassion  
22  
23 fatigue strongly predict depression levels among emergency physicians and nurses.  
24  
25 Consequently, reducing the level of burnout and compassion fatigue and increasing  
26  
27 compassion satisfaction could be a key factor in addressing depression in emergency  
28  
29 department physicians and nurses. The findings of our study have the potential to  
30  
31 provide new directions and perspectives for future research. However, further studies  
32  
33 are needed to derive more specific details through in-depth interviews with physicians  
34  
35 and nurses to clarify the underlying causes of the high prevalence of depression  
36  
37 among emergency physicians and nurses.  
38  
39  
40  
41  
42  
43  
44  
45  
46

## 47 **Acknowledgements**

48  
49 We would like to thank all emergency department physicians and nurses who  
50  
51 completed questionnaires for their unbiased participation; we gratefully acknowledge  
52  
53 the contributions by the hospital administrators of the five hospitals and thank them  
54  
55 for their efforts and time.  
56  
57  
58  
59  
60

## Contributors

HM wrote the manuscript and conducted the statistical analysis and interpretation; BW was in charge of the study concept and design; and SQH and YZ were in charge of data acquisition. All authors revised and approved the final manuscript.

## Funding

No financial support was received to conduct this study.

## Competing interests

None declared.

## Patient consent for publication

Not required.

## Ethics approval

The study was approved by the Institutional Review Board of Xiangya Nursing School (Approval number E202062), Central South University, China.

## Data availability statement

Data are available upon reasonable request.

## REFERENCES

- 1 Johnston A, Abraham L, Greenslade J, et al. Review article: Staff perception of the emergency department working environment: Integrative review of the literature. *Emerg Med Australas* 2016;28(1):7-26.
- 2 Rasmus P, Marcinkowska W, Cieleban N, et al. Workload and coping with stress and the health status of emergency medical staff in the context of work-life balance. *Med Pr* 2020;71(5):587-93.

- 1  
2  
3  
4 Elder EG, Johnston A, Wallis M, et al. Work-based strategies/interventions to  
5  
6 ameliorate stressors and foster coping for clinical staff working in emergency  
7  
8 departments: a scoping review of the literature. *Australas Emerg Care*  
9  
10 2020;23(3):181-92.  
11  
12  
13  
14 4 Sawe HR, Murray B, Jamieson J. Compassion fatigue in emergency providers:  
15  
16 Experiences from Sub-Saharan Africa. *Emerg Med Australas* 2016 ;28(1):109-11.  
17  
18  
19 5 Guillén-Astete C, Penedo-Alonso R, Gallego-Rodríguez P, et al. Levels of anxiety  
20  
21 and depression among emergency physicians in Madrid during the SARS-CoV-2  
22  
23 pandemic. Niveles de ansiedad y depresión en médicos de urgencias de Madrid  
24  
25 durante la pandemia por el virus SARS-CoV-2. *Emergencias*. 2020;32(5):369-371.  
26  
27  
28  
29  
30 6 O'Callaghan EL, Lam L, Cant R, et al. Compassion satisfaction and compassion  
31  
32 fatigue in Australian emergency nurses: A descriptive cross-sectional study. *Int*  
33  
34 *Emerg Nurs* 2020; 48:100785.  
35  
36  
37  
38 7 Stehman CR, Testo Z, Gershaw RS, Kellogg AR. Burnout, Drop Out, Suicide:  
39  
40 Physician Loss in Emergency Medicine, Part I. *West J Emerg Med*.  
41  
42 2019;20(3):485-494.  
43  
44  
45  
46 8 Borges EMDN, Fonseca CINDS, Baptista PCP, et al. Compassion fatigue among  
47  
48 nurses working on an adult emergency and urgent care unit. *Rev Lat Am*  
49  
50 *Enfermagem* 2019; 27: e3175.  
51  
52  
53  
54 9 Deering D. Compassion Fatigue: coping with secondary traumatic stress disorder in  
55  
56 those who treat the traumatized. *Journal of Psychosocial Nursing & Mental Health*  
57  
58 *Services* 1996;34(11):52.  
59  
60

- 1  
2  
3  
4 10 Sorenson C, Bolick B, Wright K, et al. Understanding Compassion Fatigue in  
5  
6 Healthcare Providers: A Review of Current Literature. *J Nurs Scholarsh*  
7  
8 2016;48(5):456-65.  
9  
10  
11 11 Chu LC. The Influence of Compassion Fatigue on Job Performance and  
12  
13 Organizational Citizenship Behaviors: The Moderating Effect of Person-Job Fit. *J*  
14  
15 *Nurs Scholarsh* 2021;53(4):500-10.  
16  
17  
18 12 Hooper C, Craig J, Janvrin DR, Wetsel MA, Reimels E. Compassion satisfaction,  
19  
20 burnout, and compassion fatigue among emergency nurses compared with nurses  
21  
22 in other selected inpatient specialties. *J Emerg Nurs*. 2010;36(5):420-427.  
23  
24  
25 13 Barnett MD, Hays KN, Cantu C. Compassion fatigue, emotional labor, and  
26  
27 emotional display among hospice nurses. *Death Stud* 2019; 9:1-7.  
28  
29  
30 14 Maslach C, Schaufeli WB, Leiter MP. Job burnout. *Annu Rev Psychology*.  
31  
32 2001;52:397-422.  
33  
34  
35 15 Moukarzel A, Michelet P, Durand AC, et al. Burnout Syndrome among  
36  
37 Emergency Department Staff: Prevalence and Associated Factors. *Biomed Res Int*.  
38  
39 2019;2019:6462472.  
40  
41  
42 16 Ilić IM, Arandjelović MŽ, Jovanović JM, Nešić MM. Relationships of  
43  
44 work-related psychosocial risks, stress, individual factors and burnout -  
45  
46 Questionnaire survey among emergency physicians and nurses. Relationships of  
47  
48 work-related psychosocial risks, stress, individual factors and burnout -  
49  
50 Questionnaire survey among emergency physicians and nurses. *Med Pr*.  
51  
52 2017;68(2):167-178.  
53  
54  
55  
56  
57  
58  
59  
60

- 1  
2  
3  
4 17 Civita M, Laurita E, Di Stefano C, Gervasoni M, Viotti S, Zucchi S. Physicians  
5  
6 and nurses' burnout in the emergency departments of North West of Italy. Intern  
7  
8 Emerg Med. 2021;16(5):1381-1385.  
9  
10  
11 18 Soltanifar A, Pishbin E, Attaran Mashhadi N, Najaf Najafi M, Siahtir M. Burnout  
12  
13 among female emergency medicine physicians: A nationwide study. Emerg Med  
14  
15 Australas. 2018;30(4):517-522.  
16  
17  
18 19. Jyothindran R, d'Etienne JP, Marcum K, et al. Fulfillment, burnout and resilience  
19  
20 in emergency medicine-Correlations and effects on patient and provider outcomes.  
21  
22 PLoS One. 2020;15(10):e0240934.  
23  
24  
25 20 Stamm B. The concise ProQOL manual. 2nd ed. Pocatello, ID: ProQOL.org. 2010.  
26  
27  
28 21 World Health Organization. Depression and other common mental disorders:  
29  
30 global health estimates, 2017. Available:  
31  
32 <https://www.who.int/publications/i/item/depression-global-health-estimates> [accessed  
33  
34 3 Jan 2017].  
35  
36  
37 22 J Priyadarshini. Depression-Let's Talk, 2017. Available:  
38  
39 [http://www.who.int/campaigns/world-health-day/2017/handouts-depression/what-y  
40  
41 ou-should-know-01.pdf?ua=1.pdf](http://www.who.int/campaigns/world-health-day/2017/handouts-depression/what-you-should-know-01.pdf?ua=1.pdf) [accessed 7 Apr 2017].  
42  
43  
44 23 An Y, Yang Y, Wang A, et al. Prevalence of depression and its impact on quality  
45  
46 of life among frontline nurses in emergency departments during the COVID-19  
47  
48 outbreak. J Affect Disord. 2020;276:312-315.  
49  
50  
51 24 Vasconcelos EM, Martino MMF, França SPS. Burnout and depressive symptoms  
52  
53 in intensive care nurses: relationship analysis. Rev Bras Enferm.  
54  
55  
56  
57  
58  
59  
60

- 1  
2  
3  
4 2018;71(1):135-141.  
5  
6  
7 25 Crilly J, Greenslade J, Lincoln C, et al. Measuring the impact of the working  
8  
9 environment on emergency department nurses: A cross-sectional pilot study. *Int*  
10  
11 *Emerg Nurs* 2017; 31:9-14.  
12  
13  
14 26 Radloff LS. The CES-D scale: a self-report depression scale for research in the  
15  
16 general population. *Appl Psychol Meas* 1977; 1:385-401.  
17  
18  
19 27 Das A, Sil A, Jaiswal S, et al. A Study to Evaluate Depression and Perceived  
20  
21 Stress Among Frontline Indian Doctors Combating the COVID-19 Pandemic. *Prim*  
22  
23 *Care Companion CNS Disord.* 2020;22(5):20m02716.  
24  
25  
26  
27 28 Leong OS, Ghazali S, Hussin EOD, et al. Depression among older adults in  
28  
29 Malaysian daycare centres. *Br J Community Nurs* 2020;25(2):84-90.  
30  
31  
32  
33 29 Xiao X, Zhu X, Fu S, et al. Psychological impact of healthcare workers in China  
34  
35 during COVID-19 pneumonia epidemic: A multi-center cross-sectional survey  
36  
37 investigation. *J Affect Disord* 2020; 274:405-410.  
38  
39  
40  
41 30 Wang Y, Wang P. Perceived stress and psychological distress among chinese  
42  
43 physicians: The mediating role of coping style. *Medicine (Baltimore)* 2019;98(23):  
44  
45 e15950.  
46  
47  
48  
49 31 Alva-Diaz C, Nieto-Gutierrez W, Taype-Rondan A, et al. Association between  
50  
51 daily working hours and depressive symptoms in resident physicians in Peru. *Rev*  
52  
53 *Colomb Psiquiatr (Engl Ed)* 2021;50(1):22-28.  
54  
55  
56  
57 32 Ogawa R, Seo E, Maeno T, et al. The relationship between long working hours and  
58  
59 depression among first-year residents in Japan. *BMC Med Educ* 2018;18(1):50.  
60

- 1  
2  
3  
4 33 Marzouk M, Ouanes-Besbes L, Ouanes I, et al. Prevalence of anxiety and  
5  
6 depressive symptoms among medical residents in Tunisia: a cross-sectional survey.  
7  
8  
9 BMJ Open 2018;8(7): e020655.  
10  
11  
12 34 Sørensen JK, Pedersen AF, Bruun NH, et al. Alcohol and drug use among Danish  
13  
14 physicians. A nationwide cross-sectional study in 2014. Dan Med J.  
15  
16 2015;62(9):A5132.  
17  
18  
19 35 Silva MRG, Marcolan JF. Working conditions and depression in hospital  
20  
21 emergency service nurses. Rev Bras Enferm. 2020;73 Suppl1:e20180952.  
22  
23  
24 36 Tran TD, Hammarberg K, Kirkman M, et al. Alcohol use and mental health status  
25  
26 during the first months of COVID-19 pandemic in Australia. J Affect Disord 2020;  
27  
28 277:810-13.  
29  
30  
31  
32 37 Ngasa SN, Sama CB, Dzekem BS, et al. Prevalence and factors associated with  
33  
34 depression among medical students in Cameroon: a cross-sectional study. BMC  
35  
36 Psychiatry 2017;17(1):216.  
37  
38  
39  
40 38 Song X, Fu W, Liu X, et al. Mental health status of medical staff in emergency  
41  
42 departments during the Coronavirus disease 2019 epidemic in China. Brain Behav  
43  
44 Immun. 2020;88:60-65.  
45  
46  
47  
48 39 Ruiz-Fernández MD, Ramos-Pichardo JD, Ibáñez-Masero O, Cabrera-Troya J,  
49  
50 Carmona-Rega MI, Ortega-Galán ÁM. Compassion fatigue, burnout, compassion  
51  
52 satisfaction and perceived stress in healthcare professionals during the COVID-19  
53  
54 health crisis in Spain. J Clin Nurs. 2020;29(21-22):4321-4330.  
55  
56  
57  
58 40 Xu HG, Johnston ANB, Greenslade JH, et al. Stressors and coping strategies of  
59  
60

- 1  
2  
3  
4 emergency department nurses and doctors: A cross-sectional study. *Australas*  
5  
6 *Emerg Care*. 2019;22(3):180-86.  
7  
8  
9 41 Lu W, Wang H, Lin Y, Li L. Psychological status of medical workforce during the  
10  
11 COVID-19 pandemic: A cross-sectional study. *Psychiatry Res*. 2020;288:112936.  
12  
13  
14 42 Hunsaker S, Chen HC, Maughan D, Heaston S. Factors that influence the  
15  
16 development of compassion fatigue, burnout, and compassion satisfaction in  
17  
18 emergency department nurses. *J Nurs Scholarsh*. 2015;47(2):186-194.  
19  
20  
21  
22 43 Jo M, Na H, Jung YE. Mediation Effects of Compassion Satisfaction and  
23  
24 Compassion Fatigue in the Relationships Between Resilience and Anxiety or  
25  
26 Depression Among Hospice Volunteers. *J Hosp Palliat Nurs* 2020;22(3):246-53.  
27  
28  
29  
30 44 Hegney DG, Craigie M, Hemsworth D, et al. Compassion satisfaction, compassion  
31  
32 fatigue, anxiety, depression and stress in registered nurses in Australia: study 1  
33  
34 results. *J Nurs Manag* 2014;22(4):506-18.  
35  
36  
37  
38 45 de Wit K. Burnout and depression among Canadian emergency physicians. *CJEM*.  
39  
40 2020 ;22(5): 559-560.  
41  
42  
43  
44  
45  
46  
47  
48  
49  
50  
51  
52  
53  
54  
55  
56  
57  
58  
59  
60



STROBE Statement—Checklist of items that should be included in reports of *cross-sectional studies*

|                              | Item No | Recommendation                                                                                                                                                                                    | Page No |
|------------------------------|---------|---------------------------------------------------------------------------------------------------------------------------------------------------------------------------------------------------|---------|
| <b>Title and abstract</b>    | 1       | (a) Indicate the study's design with a commonly used term in the title or the abstract                                                                                                            | 1       |
|                              |         | (b) Provide in the abstract an informative and balanced summary of what was done and what was found                                                                                               | 1-2     |
| <b>Introduction</b>          |         |                                                                                                                                                                                                   |         |
| Background/rationale         | 2       | Explain the scientific background and rationale for the investigation being reported                                                                                                              | 3       |
| Objectives                   | 3       | State specific objectives, including any prespecified hypotheses                                                                                                                                  | 5       |
| <b>Methods</b>               |         |                                                                                                                                                                                                   |         |
| Study design                 | 4       | Present key elements of study design early in the paper                                                                                                                                           | 5       |
| Setting                      | 5       | Describe the setting, locations, and relevant dates, including periods of recruitment, exposure, follow-up, and data collection                                                                   | 5-6     |
| Participants                 | 6       | (a) Give the eligibility criteria, and the sources and methods of selection of participants                                                                                                       | 5-6     |
| Variables                    | 7       | Clearly define all outcomes, exposures, predictors, potential confounders, and effect modifiers. Give diagnostic criteria, if applicable                                                          | 5       |
| Data sources/<br>measurement | 8*      | For each variable of interest, give sources of data and details of methods of assessment (measurement). Describe comparability of assessment methods if there is more than one group              | 6-7     |
| Bias                         | 9       | Describe any efforts to address potential sources of bias                                                                                                                                         | 14      |
| Study size                   | 10      | Explain how the study size was arrived at                                                                                                                                                         | 5       |
| Quantitative variables       | 11      | Explain how quantitative variables were handled in the analyses. If applicable, describe which groupings were chosen and why                                                                      | 8       |
| Statistical methods          | 12      | (a) Describe all statistical methods, including those used to control for confounding                                                                                                             | 8       |
|                              |         | (b) Describe any methods used to examine subgroups and interactions                                                                                                                               | N/A     |
|                              |         | (c) Explain how missing data were addressed                                                                                                                                                       | N/A     |
|                              |         | (d) If applicable, describe analytical methods taking account of sampling strategy                                                                                                                | N/A     |
|                              |         | (e) Describe any sensitivity analyses                                                                                                                                                             | N/A     |
| <b>Results</b>               |         |                                                                                                                                                                                                   |         |
| Participants                 | 13*     | (a) Report numbers of individuals at each stage of study—eg numbers potentially eligible, examined for eligibility, confirmed eligible, included in the study, completing follow-up, and analysed | 9       |
|                              |         | (b) Give reasons for non-participation at each stage                                                                                                                                              | N/A     |
|                              |         | (c) Consider use of a flow diagram                                                                                                                                                                | N/A     |
| Descriptive data             | 14*     | (a) Give characteristics of study participants (eg demographic, clinical, social) and information on exposures and potential confounders                                                          | 8       |
|                              |         | (b) Indicate number of participants with missing data for each variable of interest                                                                                                               | N/A     |
| Outcome data                 | 15*     | Report numbers of outcome events or summary measures                                                                                                                                              | 10-12   |

|    |                          |    |                                                                                                                                                                                                              |
|----|--------------------------|----|--------------------------------------------------------------------------------------------------------------------------------------------------------------------------------------------------------------|
| 1  |                          |    |                                                                                                                                                                                                              |
| 2  | Main results             | 16 | (a) Give unadjusted estimates and, if applicable, confounder-adjusted estimates and their precision (eg, 95% confidence interval). Make clear which confounders were adjusted for and why they were included |
| 3  |                          |    |                                                                                                                                                                                                              |
| 4  |                          |    |                                                                                                                                                                                                              |
| 5  |                          |    |                                                                                                                                                                                                              |
| 6  |                          |    | (b) Report category boundaries when continuous variables were categorized                                                                                                                                    |
| 7  |                          |    |                                                                                                                                                                                                              |
| 8  |                          |    | (c) If relevant, consider translating estimates of relative risk into absolute risk for a meaningful time period                                                                                             |
| 9  |                          |    |                                                                                                                                                                                                              |
| 10 |                          |    |                                                                                                                                                                                                              |
| 11 | Other analyses           | 17 | Report other analyses done—eg analyses of subgroups and interactions, and sensitivity analyses                                                                                                               |
| 12 |                          |    |                                                                                                                                                                                                              |
| 13 |                          |    |                                                                                                                                                                                                              |
| 14 | <b>Discussion</b>        |    |                                                                                                                                                                                                              |
| 15 | Key results              | 18 | Summarise key results with reference to study objectives                                                                                                                                                     |
| 16 |                          |    |                                                                                                                                                                                                              |
| 17 |                          |    |                                                                                                                                                                                                              |
| 18 | Limitations              | 19 | Discuss limitations of the study, taking into account sources of potential bias or imprecision. Discuss both direction and magnitude of any potential bias                                                   |
| 19 |                          |    |                                                                                                                                                                                                              |
| 20 |                          |    |                                                                                                                                                                                                              |
| 21 | Interpretation           | 20 | Give a cautious overall interpretation of results considering objectives, limitations, multiplicity of analyses, results from similar studies, and other relevant evidence                                   |
| 22 |                          |    |                                                                                                                                                                                                              |
| 23 |                          |    |                                                                                                                                                                                                              |
| 24 |                          |    |                                                                                                                                                                                                              |
| 25 | Generalisability         | 21 | Discuss the generalisability (external validity) of the study results                                                                                                                                        |
| 26 |                          |    |                                                                                                                                                                                                              |
| 27 | <b>Other information</b> |    |                                                                                                                                                                                                              |
| 28 | Funding                  | 22 | Give the source of funding and the role of the funders for the present study and, if applicable, for the original study on which the present article is based                                                |
| 29 |                          |    |                                                                                                                                                                                                              |
| 30 |                          |    |                                                                                                                                                                                                              |
| 31 |                          |    |                                                                                                                                                                                                              |
| 32 |                          |    |                                                                                                                                                                                                              |

\*Give information separately for exposed and unexposed groups.

**Note:** An Explanation and Elaboration article discusses each checklist item and gives methodological background and published examples of transparent reporting. The STROBE checklist is best used in conjunction with this article (freely available on the Web sites of PLoS Medicine at <http://www.plosmedicine.org/>, Annals of Internal Medicine at <http://www.annals.org/>, and Epidemiology at <http://www.epidem.com/>). Information on the STROBE Initiative is available at [www.strobe-statement.org](http://www.strobe-statement.org).
